# Supplementary material for: Novel Zebrafish Mono-α2,8-sialyltransferase (ST8Sia VIII): An Evolutionary Perspective of α2,8-Sialylation
Source: PubMed Central journal article supplement (PMC6387029; doi:10.3390/ijms20030622), 2019-01-31
Supplement: ijms-20-00622-s001.pdf [file ijms-20-00622-s001.pdf]

**Novel zebrafish mono-alpha2,8-sialyltransferase (ST8Sia VIII): an evolutionary perspective of alpha2,8-sialylation.**

Lan Yi Chang<sup>1</sup>, Roxana Elin Teppa<sup>2</sup>, Maxence Noel<sup>1</sup>, Pierre-André Gilormini<sup>1</sup>, Mathieu Decloquement<sup>1</sup>, Christine Thisse<sup>2</sup>, Bernard Thisse<sup>2</sup>, Anne Marie Mir<sup>1</sup>, Virginie Coge<sup>1</sup>, Philippe Delannoy<sup>1</sup>, Kay Hooi Khoo<sup>4</sup>, Daniel Petit<sup>5</sup>, Yann Guérardel<sup>1</sup>, Anne Harduin-Lepers<sup>1‡</sup>

<sup>1</sup>Université de Lille, CNRS, UMR 8576 - UGSF - Unité de Glycobiologie Structurale et Fonctionnelle, F-59000 Lille, France

<sup>2</sup>Bioinformatics Unit, Fundación Instituto Leloir-IIBBA CONICET, Av. Patricias Argentinas 435, C1405BWE, Buenos Aires, Argentina

<sup>3</sup>Department of Cell Biology, University of Virginia, Charlottesville, Virginia 22903, USA

<sup>4</sup>Institute of Biological Chemistry, Academia Sinica, Taipei, 11529, Taiwan

<sup>5</sup>Glycosylation et différenciation cellulaire, EA 7500, Laboratoire PEIRENE, Université de Limoges, 123 avenue Albert Thomas, 87060 Limoges CEDEX, France

‡Corresponding author : Anne Harduin-Lepers, Unité de Glycobiologie Structurale et Fonctionnelle, UMR CNRS 8576, Université de Lille, Faculté des sciences et Technologies, 59655 Villeneuve d'Ascq, France. Phone: +33 320 33 62 46; Fax: +33 320 43 65 55; E-mail: [anne.harduin-lepers@univ-lille.fr](mailto:anne.harduin-lepers@univ-lille.fr)

[orcid.org/0000-0002-1233-3799](https://orcid.org/0000-0002-1233-3799)

**Supplemental figures legends**

**Supplemental Figure S1 : Molecular Phylogenetic analysis by Maximum Likelihood (ML) method.**

**Supplemental FigureS2 : Molecular Phylogenetic analysis by Minimum Evolution (ME).**

### **Supplemental Figure S1 : Molecular Phylogenetic analysis by Maximum Likelihood (ML) method.**

The evolutionary history of vertebrate oligo- and mono- $\alpha$ 2,8-sialyltransferases was inferred using the Maximum Likelihood method based on the JTT matrix-based model [1]. The tree with the highest log likelihood (-26151.14) is shown. Initial tree(s) for the heuristic search were obtained automatically by applying Neighbor-Join and BioNJ algorithms to a matrix of pairwise distances estimated using a JTT model, and then selecting the topology with superior log likelihood value. A discrete Gamma distribution was used to model evolutionary rate differences among sites (5 categories (+G, parameter = 1.3753)). The rate variation model allowed for some sites to be evolutionarily invariable ([+I], 4.68% sites). The tree is drawn to scale, with branch lengths measured in the number of substitutions per site. The analysis involved 147 amino acid sialyltransferase sequences. All positions with less than 95% site coverage were eliminated. That is, fewer than 5% alignment gaps, missing data, and ambiguous bases were allowed at any position. There were a total of 283 positions in the final dataset. Evolutionary analyses were conducted in MEGA7 [2].

### **Supplemental Figure S2 : Molecular Phylogenetic analysis by Minimum Evolution (ME).**

The evolutionary history of vertebrate oligo- and mono- $\alpha$ 2,8-sialyltransferases was inferred using the Minimum Evolution method and the optimal tree with the sum of branch length = 21.18281333 is shown. The tree is drawn to scale, with branch lengths in the same units as those of the evolutionary distances used to infer the phylogenetic tree. The evolutionary distances were computed using the JTT matrix-based method and are in the units of the number of amino acid substitutions per site. The rate variation among sites was modeled with a gamma distribution (shape parameter = 1.5). The ME tree was searched using the Close-Neighbor-Interchange (CNI) algorithm at a search level of 1. The Neighbor-joining algorithm [1] was used to generate the initial tree. The analysis involved 147 amino acid of vertebrate oligo- and mono- $\alpha$ 2,8-sialyltransferases sequences, all positions with less than 95% site coverage were eliminated and there were a total of 283 positions in the final dataset. Evolutionary analyses were conducted in MEGA7.0 [2].

Additional references for supplemental figure legends :

1. Saitou N, Nei M: **The neighbor-joining method: a new method for reconstructing phylogenetic trees.** *Mol Biol Evol* 1987, **4**(4):406-425.
2. Kumar S, Stecher G, Tamura K: **MEGA7: Molecular Evolutionary Genetics Analysis Version 7.0 for Bigger Datasets.** *Mol Biol Evol* 2016, **33**(7):1870-1874.



# ME tree

Tetrapods  
ST8Sia VII

Vertebrate  
ST8Sia V

Fish  
ST8Sia VI-like

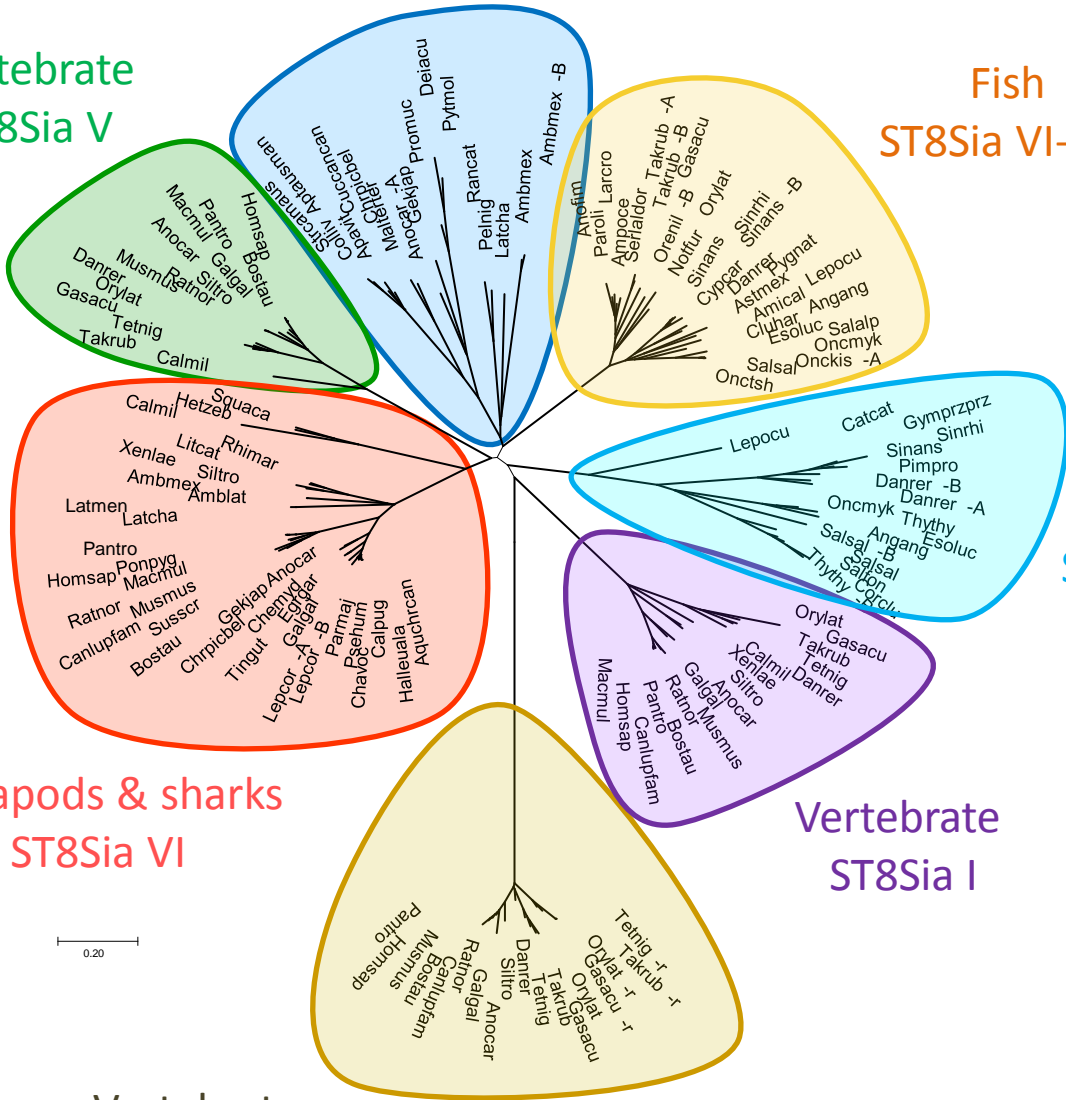

Fish  
ST8Sia VII

Vertebrate  
ST8Sia I

Tetrapods & sharks  
ST8Sia VI

Vertebrate  
ST8Sia III

## Color Key

- ST8Sia I
- ST8Sia III
- ST8Sia V
- ST8Sia VI
- ST8Sia VI-like
- Fish
- ST8Sia VII
- ST8Sia VII
- Tetrapods
- Fish

**Novel zebrafish mono- $\alpha$ 2,8-sialyltransferase (ST8Sia VIII): an evolutionary perspective of  $\alpha$ 2,8-sialylation.**

Lan Yi Chang<sup>1</sup>, Roxana Elin Teppa<sup>2</sup>, Maxence Noel<sup>1</sup>, Pierre-André Gilormini<sup>1</sup>, Mathieu Decloquement<sup>1</sup>, Christine Thisse<sup>2</sup>, Bernard Thisse<sup>2</sup>, Anne Marie Mir<sup>1</sup>, Virginie Cogez<sup>1</sup>, Philippe Delannoy<sup>1</sup>, Kay Hooi Khoo<sup>4</sup>, Daniel Petit<sup>5</sup>, Yann Guérardel<sup>1</sup>, Anne Harduin-Lepers<sup>1‡</sup>

<sup>1</sup>Université de Lille, CNRS, UMR 8576 - UGSF - Unité de Glycobiologie Structurale et Fonctionnelle, F-59000 Lille, France

<sup>2</sup>Bioinformatics Unit, Fundación Instituto Leloir-IIBBA CONICET, Av. Patricias Argentinas 435, C1405BWE, Buenos Aires, Argentina

<sup>3</sup>Department of Cell Biology, University of Virginia, Charlottesville, Virginia 22903, USA

<sup>4</sup>Institute of Biological Chemistry, Academia Sinica, Taipei, 11529, Taiwan

<sup>5</sup>Glycosylation et différenciation cellulaire, EA 7500, Laboratoire PEIRENE, Université de Limoges, 123 avenue Albert Thomas, 87060 Limoges CEDEX, France

‡Corresponding author : Anne Harduin-Lepers, Unité de Glycobiologie Structurale et Fonctionnelle, UMR CNRS 8576, Université de Lille, Faculté des sciences et Technologies, 59655 Villeneuve d'Ascq, France. Phone: +33 320 33 62 46; Fax: +33 320 43 65 55; E-mail: [anne.harduin-lepers@univ-lille.fr](mailto:anne.harduin-lepers@univ-lille.fr)

[orcid.org/0000-0002-1233-3799](https://orcid.org/0000-0002-1233-3799)

**List of supplementary data**

**Supplementary data1 : Full length sequences of 147 vertebrate mono- and oligo- $\alpha$ 2,8-sialyltransferases.**

**Supplementary data2: Multiple sequence alignments of 147 vertebrate mono- and oligo- $\alpha$ 2,8-sialyltransferases.**

**1 – Supplementary data1: Full length sequences of 147 vertebrate mono- and oligo- $\alpha$ 2,8-sialyltransferases.** Protein sequence of 147 selected vertebrate ST8Sia sequences: 129 mono- $\alpha$ 2,8-sialyltransferases *i.e.* 17 ST8Sia I (green), 15 ST8Sia V (blue), 63 ST8Sia VI (black and teleost fish sequences in red) and 34 ST8Sia VII (violet) and 18 oligo- $\alpha$ 2,8-sialyltransferases ST8Sia III (brown), which are used as an outgroup. Corresponding abbreviated names are as follows: Homsap: Homo sapiens; Pantro : Pan troglodytes; Macmul: Macaca mulatta; Musmus: Mus musculus; Ratnor: Rattus norvegicus; Bostau: Bos Taurus; Canlupfam: Canis lupus familiaris; Galgal: Gallus gallus; Siltro: Silurana tropicalis; Anocar: Anolis carolinensis; Susscr ; Sus scrofa ; Ponpyg: Pongo pygmaeus; Latcha: Latimeria chalumnae; Chemyd: Chelonia mydas; Chrcpicbel: Chrysemys picta bellii; Aquchrca: Aquila chrysaetos Canadensis; Egrgar: Egretta garzetta; Psehum: Pseudopodoces humilis; Lepcor: Lepidothrix coronata; Halleuala: Haliaeetus leucocephalus alascanus; Chavoc: Charadrius vociferous; Calpug: Calidris pugnax; Tingut : Tinamus guttatus ; Parmaj : Parus major ; Gekjap : Gekko japonicus ; Xenlae : Xenopus laevis ; Calmil : Callorhynchus milii ; Amblat : Ambystoma laterale ; Litcat: Rana catesbeiana; Hetzeb: Heterodontus zebra; Squaca: Squalus acanthias; Ambmex: Ambystoma mexicanum; Rhimar: Rhinella marina; Latmen: Latimeria menadoensis; Colliv: Columba livia; Deiacu: Deinagkistrodon acutus; Pytmol: Python molurus; Strcamaus: Struthio camelus australis; Apavit: Apaloderma vittatum; Promuc : Protobothrops mucrosquamatus ; Rancat : Rana catesbeiana ; Malterter : Malaclemys terrapin terrapin ; Gymprzprz : Gymnocypris przewalskii przewalskii ; Catcat : Catla catla ; Pimpro : Pimephales promelas ; Salfon : Salvelinus fontinalis ; Corclu : Coregonus clupeaformis ; Thythy : Thymallus thymallus ; Pelnig : Pelophylax nigromaculatus ; Aptausman : Apteryx australis mantelli ; **Lepocu : Lepisosteus oculatus ; Anofim : Anoplopoma fimbria ; Amical : Amia calva ; Sinans : Sinocyclocheilus anshuiensis ; Sinrhi : Sinocyclocheilus rhinoceros ; Cypcar : Cyprinus carpio ; Pygnat: Pygocentrus nattereri; Onckis: Oncorhynchus kisutch; Esoluc: Esox Lucius; Salsal: Salmo salar; Astmex: Astyanax mexicanus; Salalp: Salvelinus alpinus; Cluhar : Clupea harengus ; Notfur : Nothobranchius furzeri ; Serlaldor ; Seriola lalandi dorsalis ; Larcro : Larimichthys crocea ; Paroli : Paralichthys olivaceus ; Ampoce : Amphiprion ocellaris ; Gasacu : Gasterosteus aculeatus ; Tetnig : Tetraodon nigroviridis ; Takrub: Takifugu rubripes; Gasacu: Gasterosteus aculeatus; Danrer: Danio rerio; Oncmyk: Oncorhynchus mykiss; Orylat: Oryzias latipes; Angang: Anguilla Anguilla; Orenil: Oreochromis niloticus; Onctsh: Oncorhynchus tshawytscha;**

>Homsap\_GT29\_ST8Sia6

```
MRPGGALLALLASLLLLLLLRLWCPADAPGRARILVEESREATHGTPAALRTLRS PATAVP
RATNSTYLNEKSLQLTEKCKNLQYGI EFSNKTKRYSENDYLQIITDIQSCPWKRQAE EYAN
FRAKLASCCDAVQNFVVSQNNTPVGTNMSYEVE SKKEIPIKKNIFHMFVVSQPFVDYPYNQC
AVVGNGGILNKSLCGTEIDKSDVFVRCNL PPTTGDVSKDVGSKTNLVTINPSIITLKYGNLK
EKKALFLEDIATYGDAFFLLPAFSFRANTGTSFKVYYTLEESKARQKVLFFHPKYLKDLALF
WRTKGV TAYRLSTGLMITSVAVELCKNVKLYGF WPF SKTVEDIPVSHHYYDNKLPKHGFHQM
PKEYSQILQLHMKGILKLQFSKCEVA
```

>Pantro\_GT29\_ST8Sia6

MRPGGALLALLASLLLLLLLLRLLWCPADAPGRARILVEESREATHGTPAALRTLRS PATAVP  
RATNSTYLNEKSLHLTEKCKNLQYGI ESFSNKTKGYSENDYLQIITDIQSCPWKRQAE EYAN  
FRAKLASCCDAVQNFVVSQNNTPVGTNMSYEVE SKKEIPIKKNIFHMFVVSQPFVDY PYNQC  
AVVGNGGILNKSLCGTEIDKSD FVFR CNLPPTTGDVSKDVGSKTNLVTINPSIITLKYGNLK  
EKKALFLEDIATYGEAFFLLPAFSFRANTGTSFKVYYTLEESKARQKVLFFHPKY LKDLALF  
WRTKGV TAYRLSTGLMITSVAVELCKNVKLYGFWPFSKTVEDIPVSHHYYDNKLPKHGFHQ M  
PKEYSQILQLHMKGILKLQFSKCEVA

>Macmul\_GT29\_ST8Sia6

MRPGGALLALLASLLLLLLLLRLLWCPADAPAHTRILVEESKEATHGTPAALRTLRS PATAVP  
RATNSTYLNEKSLQLTEKCKNLQYGI ESFSNNTKGYSENDYLQIITDIQSCPWKRQAE EYAN  
FRAKLASCCDAVQNFVVSQNNTPVGTNMSYEVE SKKKIPIKKNIFHMFVVSQPFVEY PYNQC  
AVVGNGGILNKSLCGAEIDKSD FVFR CNLPPTTGDVSKDVGSKTNLVTINPSIITLKYGNLK  
EKRALFLEDIATYGDAFFLLPAFSFRANTGTSFKVYYTLEESKARQKVLFFHPKY LKHLALF  
WRTKGV TAYRLSTGLMITSVAVELCENVKLYGFWPFSKTVEDIPVSHHYYDNKLPKRGFHQ M  
PKEYSQILQLHMKGILKLQFSKCEVA

>Musmus\_GT29\_ST8Sia6

MRSGGTLFALIGSLMLLLLLLRLWCPADAPARSRLMEGSREDTSGTSAALKTLWSPTTPVP  
RTRNSTYLDEKTTQITEKCKDLQYSLNSLSNKTRRYSEDDYLQITITNIQRC PWNRQAE EYDN  
FRAKLASCCDAIQDFVVSQNNTPVGTNMSYEVE SKKHIPIRENI FHMFPVVSQPFVDY PYNQC  
AVVGNGGILNKSLCGAEIDKSD FVFR CNLPPI TGSASKDVGSKTNLVTVNPSIITLKYQNLK  
EKKAQFLEDISTYGDAFLLLPAFSYRANTGISFKVYQTLKESKMRQKVLFFHPRYLRHLALF  
WRTKGV TAYRLSTGLMIASVAVELCENVKLYGFWPFSKTIEDTPLSHHYYDNMLPKHGFHQ M  
PKEYSQMLQLHMRGILKLQFSKCEVA

>Ratnor\_GT29\_ST8Sia6

MRPGGTLFALVGSMLLLLLLRLFWCPADAPARS RMLGEESREETGGTSAALKTLWSPTTPVP  
RTRNSTYLDEKTPETA EKCKGLKYS LDSLANKTRRYSEDDYLQIVTNIQRC PWKRQAE EYEN  
FRAKLASCCDAIQDFVVSQNNTPVGSNMTYEVE SKKQIPIRENI FHMFPVVSQPFVDY PYNQC  
AVVGNGGILNKSLCGAEIDKSD FVFR CNLPPI TGSASQDVGSKTNLVTVNPSIITLKYKNLK  
EKKARFLEDISAYGDAFLLLPAFSYRVNTGISFKVYQTLKESKVRQKVLFFHPRYLRHLALF  
WRTKGV TAYRLSTGLMIASIAVELCENVTLYGFWPFSKTVEEIPLSHHYYDNKLPKHGFHQ M  
PKEYSQMLQLHMKGILKLQFSKCEAA

>Bostau\_GT29\_ST8Sia6

MRPGGALFALLASLLLLLLLLRLLWCWTDAPARS RFLVEESREATHSSPAAPRKLRS SATLPP  
RTGNSTYLNEKSLHLMERCQNLQAGLETLSNR TKGYSEDEYLQIITNIQSCPWKRQVE EYEN  
FRAKLASCCDAVQNFIVSQNNTPIGTNMTYEVE SKSKIQIKENIFDMLPVVQPFVGY SFNQC  
AVVGNGGILNQSLCGAEIDKADFVFR CNLPPTTGNVTNDVGTKTNLVTLNPSIIK LRYGNLK  
EKKAI FLEDVAA YGDAFVLLPAFSFRANTAASFVYYTTLKESKARQKVLFFHPKY LKNLALF

WRTKGVTEYRLSSGLMITSVAVELCENVKLYGFWPF SRTGENMPVSHHYYDNKLPKRGFHEM  
PKEYSQILQLHVKGILKLQFSKCETA

>Canlupfam\_GT29\_ST8Sia6

MRPGGALLALLASLLLLLLLRLCCSTDAPARSRLSAERSRDGPRGTPAAPRTLRS PATQLP  
RPANSTYPNEKSLQLTEMCKSLRDGFQRLYSKAKNYLES DYLQIIRNIQNC PWKRQEEYEN  
FRAKLASCCDAAQNFIVSQNNTPAGTNMSYEVE SKNEILIRENIFNMFPVSQP FVEYPYNQC  
AVVGNGGILNKSLCGAEIDKSDVFVRCNLPPITGNISKDVGSKTNVVTVNPSIIRLKYGNLK  
KKKEIFLEDIATYGDAFLLLPAFSFRANTIASFKVYSTLKESNARQKVIFFHPKYLRNLALF  
WRTEGVTEFRLSSGLMITSVAVELCEHVKLYGFWPF SRTVKDTPVSHHYYDNNLPKRGFHEM  
PKEYRQILQLHLKGILKLQFSKCEIA

>Galgal\_GT29\_ST8Sia6

MPAGQRPSGSGRRPVAALAGFDNFCYPVLLARGWEEEA EVATVTPKVVRALRSPLTSLPQTE  
NRTTANKDGIYQFELDTKCKAIQDNILSSSFKKKRY PEDYYLHIVKKLQNC TWVRRPEESAK  
FRSELASCCNAVHNF IASQNNTPLGSNMSYEVD SKKTLITEDI FRMLPVSSPLSVYPFKNC  
AVVGNGGILKNSSCGAEIDRSDFVRCNLPP TMGSI SKDVGNKTKLVTVNPSIIAQKYNKLN  
EKKTEFVENVAVYGDAFLLLPAFSFRSNTATSFKVYHTLQEFKATQRAIFFHPTYLKNLAQF  
WRTKGVKAYRLSSGFMITSA AVELCENVKLYGFWPF SKSTEKMPI SHHYYDNQLPKPGFHAM  
PKEYNQILQLHGKGIKKLQFGKCESD

>Siltro\_GT29\_ST8Sia6

MRGHNMKKTLLVLLGTSLLL FVLT VWLSIGESAHYRPGTVTSTFGLVKPEVNFIVTSQS NYT  
TSPVNNSYCRDVQDRLLTVSLKKRYSEDYIYIQT VNDLQNC TWHKRPEERSKFRLLDSSCCNG  
VKNFIVSQNNTSVGINITYEVESKKRILITEE IYRMLPKSQPF DGTPFKQCAVVGNGGILAN  
SGCGVEIDQSDVFVRCNLPP TSGNVSDVGNKTNLVTVNPSIISQKYRKLNVKNVFLKYVS  
NYGNSLLLLPAFSYSSNTAISFEVHRVLEKNQAKQKAVFFHPNYLKNLAKFWKGGV RAYRL  
STGLMITSAAAMELCEEVILYGFWPF SKDLEGKPI SHHYYDNMLPKPGFHAMPKEFYQVLQLH  
HKGVLRLQIGKCEKR

>Takrub\_GT29\_ST8Sia6-A

MRGKFLKTRFCLGIVIVCLMGLLSILSWYLS DNKQESHSSWKTGSPPAVGRTVLR LQEITDK  
VNRLYAQTLEKKEDKSKILRSELSSKCQGF EKAIITQANTVVGSKI VYDGERKSLVQVTPEM  
FNTFPKEHPFPNKTWETCAVVGNGGILSDSGCGKMIDSAQFVIRC NLPLNNGYQDHVGVKT  
DLVTANPSILVEKYGALMGRRRPFIESLRSYGN SLLLLPTFSYRSNTPVSLRAFYSIEDFGS  
PTRAISFNPQYLQKLDVFWRSKGLRAVRLSSGLMVASLAL ELC SNVHLYGFWPF SNHPNGLR  
TLKNHYDDIPPKKFFHAMPVEFELLLKLHTEGVLRLHLDDCVPGEVNL MGSTGGDRP

>Takrub\_GT29\_ST8Sia6-B

MRGQFLKNLFSLGIVVVCLGGLLTLSWYLS DNKNHTAPVRQEVPPQADDLSSGCREIIDK  
VNRLYAQTWEKKEDKYKKFRSELSSKCQGF EKAIITQANTVVGSKI VYDGERKRSVKVSTEM  
FNTFPKEHPFPNKTWETCAVVGNGGILSDSGCGKMIDSAQFVIRC NLPLNNGYQDHVGVKT  
DLVTANPSILFEKYGALMGRRRPFIESLRSYGN SLLLI PAFSYGNNTPVSLRAFYSIEDFGS



PTRTIFFNPQYLQKLAVFWRKGLRAVRLSSGLMVASLALCLCSNVHLFGFWPFSNHPHGLR  
TLKNHYDDIQTKKKFHAMPVEFELLLQLHTEGVLRLHLDDCVPGEVNLMGSTRGDGPPL

>Gasacu\_GT29\_ST8Sia6

MRGRRLKPLFSLGIALFCLGILLTALVWYNGNSNVETRQLSLEKKRAPPSELCKGCRQFID  
KVRERYNKTWIKQVDDYLEFRSRLSRKCHGFDSAFITQYNTPVGAKIVYDGEKTRTLQVTPE  
IFSTFPKEHPFSNKIWGTCVVGNGGILSNSSCGKMIDSAEFVMRCNLPPLDNGYENDVGIK  
TDLVTANPSILIKKYGSLQRRRPFVESLRSYGNSLLLLPAFSYGFNTPLSLRAVYSIEDFK  
SPTRPVFFNPEYLESGLFWRSRGLKAVRASTGLMMASLALHCTDVHLYGFWPFGNHPQGL  
HALTNHYDDVQPKNTVHAMPVEFEFLLQLHSQGVRLRLHLEDCQPGEK

>Danrer\_GT29\_ST8Sia6

MRVMRTLMRWLLPVILLCSFCSVAFWIFI SNNNVI PHPASRI POKASNTQSCKACKDSVIIG  
KALGNYSNSWKKHEANYKFRLLLNEKCHAVSKAVVTQNNTPLGSNVVYDGERRKPLQVTQA  
LYNILAKEQPFGNATWESCAVVGNGGVLANS SCGEEINSAQFVIRCNLPPLD DRYEKDVGNK  
TNLVTANPSILHEKYSGLMERRRPFVESLHSYGQALLLP AFSYGHNTPVSLRAFYTLEDFG  
REGPLPIFLNPEYLRKLT KFWREQGLNSVRPSTGLIMASLAL EICTNVHLYGFWPF GKHPND  
SRPITNHYYDNRESKKNVHSM PSEFEQLLKLHKQGVVHIHLGECQPAHR

>Oncmyk\_GT29\_ST8Sia6

MRGLFSFMLTILSILGTVLTALVWYFFSKHNVQGRPPHKSPIMNSGPFPSRTCKGCRDVTVD  
KVLELYSHSWRKQEDKFRKFRSLLSNRCHGLTKAMVTQANTPLGSKVVYDGEKRRKPLQVTPE  
LFSTFAKENPFVNTTWDTCVVGNGGILANS SCGEKIDSAQFVIRCNLPPLENGYERDVGNK  
TDLVTANPSILMEKYGGLQERRRPFVESLRSYGD SLMLLPAFSYGHNTPVSLRALYTIQDFD  
SPSRPVFLNPEYLQSLARFWQGLRTRVRLSTGLIVASLAL ELCANVHLYGFWPFNEHPHRH  
QPLTNHYDNRQSKKTVHAMP AEFDHLRLHTQGVLR IHLGECAPTASPGCSSKMAWTPASV  
SGLSLPVGSLGSAMPTLVQRNTTSQSRKPWAGPDTNVSGPSGL

>Anocar\_GT29\_ST8Sia6

MHRAVLSLAALLGSLLLCLCLAWLSADGSSGARGWEKELRATTAESSPRVMMMMRSLRSPT  
APLPRPPTGSLAPNRTPSNQTGTQKSEQVSKCKETWNNNWSSSIKKKRYSEDYYLQIVGKLQ  
NCTWKKRPQEYAKFRSELTSCCDAIHNFISSQNNTPLGSNMSYEVDNKKTIHITEEIFKMLP  
ESQPLDYPFKQCAVVGNGGILKNSNCGAEIDKSD FVFRCNLPTEGSVSQDVGNKTNLVTVN  
PSIIAQKYNKLNKATFLENIASYGDAFLLLPAFSFRSNTATSFKVHHTLREFSAKQKAI F  
FYPRYLKNLAQFWRTKGVKAYRLSSGFMITSA AVELCENVKLYGFWPFSSKIAGNPISHHY  
DNQLPKPGFHAMPKEYNQILQLHGRGILKLQLGKCHTE

>Susscr\_GT29\_ST8Sia6

MRPGGALLALLASLLLLLLLRLWCSTDAPASSRFLVEESREATHSTPAALRTLRSRATQPP  
HTTSSTYLNAKSLQPTERCQNLQDDLKALS NKTRKYSEDDYLQIITNIQSCPWKRQAEAYEN  
FRAKLASCCDAVQNFIVSQNNTPVGTNMSYEVESKSEIQIRESIFDMLPVFQPFIFGYPNQC  
AVVGNGGILNQS LCGAEIDKSD FVFRCNLPPTTGNISNDVGSKTNLVTLNPSIIRLRYGNL K  
EKKAVFLEDIATYGDAFVLLPAFSFRANTAASFKVYYALKESNSRQKVLFFHPKYLKHLAVF

WRTKGVTEYRLSSGLMIASVAVELCENVKLYGFWPFSTGENTPVSHHYYDNKLPKRGFHEM  
PKEYRQILQLHVKGILQLQFSKCDTS

>Orylat\_GT29\_ST8Sia6

MKRHPLNELFSMMITFLFVGSLLTSLGWYMVDSNNVHPPLPPQKKSPPKLPDPCKNCDENIM  
KALELYSEPWKKQEDNYHQFRSQLNSKCHGLEKAIITQANTPQGTKLVYDAERKRTLTVVNAE  
VFNTFIKENPFPNKTWDTCAVVGNGGILANSSCGKTIDSAQFVIRCNLPPLSNGFEKDVGIK  
SDIVTANPSIITEKYFSLMRHRRPFAEAMRIYGNMVLPPAFSFGHNTALSMRAFYTLEDFE  
SSARAVYFNPEYLNLANFWRSEGLKSPRLSTGIMMASIALEVCSEVHLYGFWPFVHPYSH  
QGLTNHYYDDRKAKNKFHAMPTEFNLLQLHRKGVLRRLHLDGCTPDEK

>Ponpyg\_GT29\_ST8Sia6

MRPGGALLALLASLLLLLLLRLWCPADAPARARI PVEESREATHGTPAALRTLRS PATAVP  
RATNSTYLNEKSLQLTEKCKNLQYGI EFSNKTKGYSENDYLQIITDIQSCPWK RQAE EYAN  
FRAKLASCCDAVQNFVVSQNNTPVGTNMSYEVE SKKEIPIKKNIFHMFPVSQPFVEYPYNQC  
AVVGNGGILNKSLCGTEIDKSDVFVRCNL PPTTGDVSKDVGSKTNLVTINPSIITLKYGNL K  
EKKALFLEDIATYGDAFFLLPAFSFRANTGTSFKVYYTLEESKARQKVLFFHPKYLKDLALF  
WRTKGV TAYRLSTGLMITSVAVELCKNVKLYGFWPFSTVEDTPVSHHYYDNKLPKRGF HQM  
PKEYSQILQLHMKGILKLQFSKCEVA

>Latcha\_GT29\_ST8Sia6

MWMCRRKICILLWILLASGVFFLLTFWIKYDAALHYREIANKDWRDCLATACGRRGMRELE  
SAVSPHRPLPTSNSNNTNQN GSTFNKLNLLKADSSSCKELHNRMSATTPRKRYSDDYYIQTV  
NELQKCSWVIRPEEHEKFRSELSVCCNAVRNFIVSQNNTPLGTNMSYEVENGRTFLITQRIF  
KMFPQSQPFAGYPYNQCAVVGNGGILKNSACGTEIDQADFVRCNL PPTLGNISIDVGSKTS  
LVTLNPSIITHRFGLNEKRKPFVETVSHYGEAFLLLPAFSFRSNTALSFKVYHTLEAFRGK  
QKTIFHHPKYLKSLALFWR SKGIKVYRLSSGFMIAANAIELCKEVRLYGFWPF SKNNEGKNI  
SHHYYDNQLPKPGIHSMPKEFYHFLKLNKGI IKLQFGRCDIT

>Chemyd\_GT29\_ST8Sia6

MRAVIALIAMLSLLLLFLC LLWLTADGSLSTRSWEKETKSATDITPKGLRKLRSPLTSVQLA  
TQTENRTTHKNAIYQLQLASKCKEMQDYIWSSSIKKKRYSEDYYLQIVTKIQNCTWKRRPEE  
YTKFRLELASCCDAVHNFIASQNNTALGSNMSYEVDNKKTLITEDI FRMLPESPPLLDYPF  
KHCAVVGNGGILKNSSCGAEIDKSDVFVRCNL PPTTGSVSKDVGNKTNLVTVNPSIIAQKYN  
KLNEKKVTFLENIASYGNAFLLLP AF SFKSNTAASFVYHTLQEFRAKQRAIFFHPRYLKSL  
AQFWRTKGVKAYRLSSGFMIASAAIELCENVKLYGFWPFSTTEEMPI SHHYYDNQLPKPGF  
HAMPKEYNQILQLHGKGIVKLQFGKCDSDXKGTSDSSKIKHFRLSFRAKLPFLQPGAVPQIC  
TLFPKRL

>Chrpicbel\_GT29\_ST8Sia6

MRAVIALIAMLSLLLLFVCLLWLTADGSLSTRSWEKETKSATDVTPKGLRKLRSPLTSVQLA  
TQTENRTILKNAIYQLQQASKCKEMQDNIWSSSIKKKRYSEDYYLQIVTKIQNCTWKRRPEE  
YTKFRLELASCCDAVHNFIASQNNTLLGSNMSYEVDNKKTILITEDI FRMLPESPFLGYPF

KHCAVVGNGGVLKNSSCGAEIDNSDFVFR CNLPPTTGSVSKDVG NKTSLVTVNPSIIAQKYN  
KLNEKKVTFLENIASYGNAFLLLPAFSFKSNTAASFKVYHTLQEFRAKQRAIFFHPRYLK NL  
AQFWRTKGVKAYRLSSGFMIAAAIELCENVKLYGFWPFSKTTEEMPISHHYDNQLPKPGF  
HAMPKEYNQILQLHGKGILKLQFGKCDS

>Aquchrcan\_GT29\_ST8Sia6

MRAVVALAAALG SLLLGGCLLRLGGQQPLRARGWEEDAGVATVTPKVVRALRSPLTSLPQTE  
NRTTVNKNGIYQFEQASKCKAIQDNILSSSIKKKRYSEDYLLHIVTKLQ NCTWIRRPEESTK  
FRSELASCCDAVHNF IASQNN SPLGSNMSYEVD SKKTILITEDI FKMLPVSSPLSVYPFKTC  
AVVGNGGILKNSSCGAEIDHSDFVFR CNLPPTTGSISKDVG NKTNLVTVNPSIIAQKYNKLN  
EKKTEFLENI AVYGDAFLLLPAFSFRSNTATSFKVYHTLQEFKATQRAIFFHPTYLKSLAQF  
WRTKGVKAYRLSSGFMITSAALELCENVKLYGFWPFSKST EKMPI SHHYDNQLPKPGFHAM  
PKEYNQILQLHGKGILKLQFGKCESD

>Egrgar\_GT29\_ST8Sia6

MPRQTATEGSVRGLGWVSCSHSTGASHPHSEQQRANSSVLWPTSAPLGTEEIQGVESQKLDL  
LWRITVPYKLARGWEEDA AVAAVTPKVVRALRSPLPSLPQ TENRTNVNKKGIYRFEQASKCK  
AIQDNILSSSIKKKRYSEDYLLHIVTKLQ NCTWIRRPEESMKFRSELASCCDAVHNF IASQ N  
NTPLGSNMSYEVD SKKTILITEDI FKMLPVSSPLSVYPFKTC AVVGNGGILKNSSCGAEIDR  
SDFVFR CNLPPTTGSISKDVG NKTNLVTVNPSIIAQKYNKLN EKKTEFLEDVAVYGDAFLLL  
PAFSFRSNTATSFKVYHTLKEFRASQRAIFFHPTYLKSLAQFWRTKGVKAYRLSSGFMITSA  
ALELCENVKLYGFWPFSKST EKMPI SHHYDNQLPKPGFHAMPKEYNQILQLHGKGILKLQF  
GKCESD

>Psehum\_GT29\_ST8Sia6

MRAVIALAAALG SLLLGGCLLRLGGQQPLRARGWEEEEAGVAAVTPKVVRALRSPLTPLPHE  
NRYGLAARRTTLNKNGIYQFEQASKCKAIQDNILSSSIKKKRYSEDYLLHIVTKLQ NCTWIR  
KPEESTKFRSELASCCDAVHNF IASQNN SPLGSNMSYEVD SKKTILITEDI FKMLPVSSPLS  
VYPFKNCAVVGNGGILKNSSCGAEIDSSDFVFR CNLPPTTGNISKDVG NKTNLVTVNPSIIA  
QKYNKLN EKKTEFLENI AAYGDAFLLLPAFSFRSNTATSFKVYHTLKEFKATQRAIFFHPSY  
LKSLAQFWRTKGVKAYRLSSGFMITSAALELCENVKLYGFWPFSK SIEKMPI SHHYDNQLP  
KPGFHAMPKEYNQILQLHGKGV LKLQFGKCESD

>Lepcor\_GT29\_ST8Sia6-B

MRAVIALAAALG SLLLGGCLLRLGGQQPLRARGWQEEEAGVAAVTPKVVRALRSPLTPLPQT  
ENRTTANKNGIYQFEQASKCKAIQDNILSSSIKKKRYSEDYLLHIVTKLQ NCTWIRRPEEST  
KFRSELASCCDAVHNF IASQNN SPLGSNMSYEVD SKKTILITEDI FKMLPVSSPLSVYPFKT  
CAVVGNGGILKNSSCGAEIDSSDFVFR CNLPPTTGSISKDVG NKTNLVTVNPSIIAQKYNKLN  
NEKKTEFLENI AVYGDAFLLLPAFSFRSNTATSFKVYHTLKEFKATQRAIFFHPAYLKSLAQ  
FWRTKGVKAYRLSSGFMITSAALELCENVKLYGFWPFSKST EKMPI SHHYDNQLPKPGFHA  
MPKEYNQILQLHGKGILKLQFGKCESD

>Halleuala\_GT29\_ST8Sia6

MRAVVALAAALGSLLLGGCLLRLGGQQPLRASPVLLARGWEEDAGVATVTPKVVRALRSPLT  
SLPQTENRKPVNKNGIYQFEQASKCKAIQDNILSSSIKKKRYSEDYYLHIVTKLQNCWIR  
PEESTKFRSELASCCDAVHNFIA SQNNSPLGSNMSYEVD SKKTILITEDI FKMLPVSSPLSV  
YPFKTCAVVGNGGILKNSSCGAEIDHSDFVFR CNLPPTTGSISKDVG NKTNLVTVNPSIIAQ  
KYNKLNEKKTEFLENI AVYGDAFLLLPAFSFRSNTATSFKVYHTLQEFKATQRAIFFHPTYL  
KSLAQFWRTKGVKAYRLSSGFMITSAALELCENVKLYGFWPFSKSTEKMPI SHHYDNQLPK  
PGFHAMPKEYNQILQLHGKGILKLQFGKCESD

>Lepcor\_GT29\_ST8Sia6-A

MRAVIALAAALGSLLLGGCLLRLGGQQPLRARGWQEEEAGVAAVTPKVVRALRSPLTPLPQT  
ENRYGLPARRTTANKNGIYQFEQASKCKAIQDNILSSSIKKKRYSEDYYLHIVTKLQNCWIR  
RRPEESTKFRSELASCCDAVHNFIA SQNNSPLGSNMSYEVD SKKTILITEDI FKMLPVSSPL  
SVYYPFKTCAVVGNGGILKNSSCGAEIDSSDFVFR CNLPPTTGSISKDVG NKTNLVTVNPSII  
AQKYNKLNEKKTEFLENI AVYGDAFLLLPAFSFRSNTATSFKVYHTLKEFKATQRAIFFHPA  
YLKSLAQFWRTKGVKAYRLSSGFMITSAALELCENVKLYGFWPFSKSTEKMPI SHHYDNQL  
PKPGFHAMPKEYNQILQLHGKGILKLQFGKCESD

>Chavoc\_GT29\_ST8Sia6

MSKTGKLV TMDKERGIRGEESGAAHARWCLIPGFDNFVSP LSLGRGWEEEDAGVAAVTPRVVR  
ALRSPLPSLAQGGNRTTVN KNGIYQFEQASKCKAIQDNILSSSIKKKRYSEDYYLHIVTKLQ  
NCTWTRRPEESTKFRSELASCCDAVHNFIA SQNNTPLGSNMSYEVD SKKTILITEDI FKMLP  
VSSPLSAYPFKTCAVVGNGGILKNSSCGAEVDRSDFVFR CNLPPTTGSISKDVG NKTNLVTV  
NPSIIAQKYNKLNEKKTEFLENI AVYGDAFLLLPAFSFRSNTATSFKVYHTLQEFKATQRAI  
FFHPTYLRLSLAQFWRTKGVKAYRLSSGFMITSAALELCENVKLYGFWPFSKSTEKMPI SHHY  
YDNQLPKPGFHAMPKEYNQILQLHGKGILKLQFGKCESD

>Calpug\_GT29\_ST8Sia6

MRAVIALAAALGSLLLGGCLLRLGGQQPLRARGWEEEEEEEEAGAAVTPKVGRALRSPSAAL  
PQAGNRTTVN KNGIYQFEQASKCKAIQDNILSSSIKKKRYSEDYYLHIVTKLQNCWIRRPE  
ESTKFRSELASCCDAVHNFIA SQNNTPLGSNMSYEVD SKKTVLITEDI FKMLPVSSPLSVYP  
FKTCAVVGNGGILKNSSCGAEIDRSDFVFR CNLPPTTGSISKDVG NKTNLVTVNPSIIAQKY  
NKLNEKKTEFLDNI AVYGDAFLLLPAFSFRSNTATSFKVYHTLQEFKATQRAIFFHPTYLKS  
LAQFWRTKGVKAYRLSSGFMITSAALELCENVKLYGFWPFSKSTEKMPI SHHYDNQLPKPG  
FHAMPKEYNQILQLHSGKILKVQFGKCESD

>Tingut\_GT29\_ST8Sia6

MLMSRLEHCQDELIWKRPCKLLGEVPAAMTQAPLRAPSQGGANVPQSMLPGTEEMQAAVWQ  
KVMFIELSLVYSHFSWFKLQLQKDHFLTELKQRGETTISDKNGIYQFEQASKCKEIQDN  
ILSSLTKKRYSEDDFLHLVTKLQNCWVWRPEECTKFRSELASCCDAVHNFV ASQNNTPLG  
SNMSYEVESKKTILITENIFRMLPVSSPFSAYPFKNC AVVGNGGILKNSSCGAEIDRADFV  
RCNLPPTTGSMSKDVG NKTNLVTVNPSIIAQKYNKLNKKKTEFLQNI AVYGDAFLLLPAFSY  
RSNTATSFKVYQTLKEFKAMQRAIFFHPTYLKSLAQFWRTKGVKAYRLSSGFMITSAAEILC

ENVKIYGFWPFSSKSTEKMPI SHHYDNQLPKPGFHAMPKEYNQILQLHGKGILKLQFGKCES  
E

>Parmaj\_GT29\_ST8Sia6

MRAVIALAAALGSLLLGGCLLRLGGQQPLRARGWEEEEAGVAAVTPKVVRALRSPLTPFPHTE  
NRYGLAARRTTLNKNGIYQLEQASKCKAIQDNILSSSIKKKRYSEDYYLHIVTKLQNCTWIR  
KPEESTKFRSELASCCDAVHNFIASQNNSPGLSNMSYEVDSSKKTILITEDIKMLPVSSPLS  
VYPFKNCAVVGNGGILKNSSCGAEIDSSDFVFRNLPPTTGNISKDVGKTNLVTVNPSIIA  
QKYNKLNEKKTEFLENIAAYGDAFLLLPAFSFRSNTATSFKVYHTLKEFKATQRAIFFHPAY  
LKSLAQFWRTKGVKAYRLSSGFMITSAALELCENVKLYGFWPFSSKSIKMPI SHHYDNQLP  
KPGFHAMPKEYNQILQLHGKGILKLQFGKCESD

>Gekjap\_GT29\_ST8Sia6

MPGIELACQVDAPYLSHGPAWRKLDLQDDGRLEQLTDMIKVTMEKPPLRWRSLLTTWACLAC  
LLARGWEKEVKAATDAAPRVMSLRSPVASLQLTPHMATNRTPNQSGIQKPETASKCKEMW  
SNSWAASVKKRYAEDYQLQVVGRLQNCTWNKRPOEYAKFKSELASCCDAAHNFITSQNNTP  
LGSNMSYEVDNKKTIHITEEIFRMLPESQPLEQPFKNCAVVGNGGILKNSSCGAEIDQSDVF  
FRNLPPTMGSIQDVGSKTNLVTINPSIISQKYNKLNEKKATFLENIASYGDTFLLLPAFS  
FRSNTAASFVHHTLKEFSKQKAIFFYPYLRNLAQFWRTKGVKAYRLSSGFMITSAALEL  
CENVKLYGFWPFSSKNVAGTPI SHHYDNQLPKPGFHAMPKEYNQILQLHGRGILKLQFGKCL  
PD

>Xenlae\_GT29\_ST8Sia6

MRGRNMKKTFLLLLGTSLLLFILTVWLSIGESARYRSGTVTSRVGLVKPELSYTVPSQSNYT  
TSPVISSFCRDVEDRLLTVSLKKRYSEDYIYQTVNELQNCTWQKRPQEYSKFRLYLSTCCNG  
LKNFIVSQNNTSLGSNITYEVESKKKILIAEEIYRMFPKSQPFVVGAPFKQCAVVGNGGILAN  
SGCGAEIDQSDVFVFRNLPPTWGNISVDVGKTNLVTVNPSIISRKYRKLNVKKNVFLKNVS  
NYGYSFLLLPAFSYSNTAISFEVHRILEKNQAKQKAIFFHPYLLKNLAQFWKGRGVRAYRL  
STGLMITSAAIELCEEVKLYGFWPFSSKNQEGKPI SHHYDNILPKPGFHAMPKEFYQVLQLH  
HKGVLRLQIGKCEKR

>Calmil\_GT29\_ST8Sia6

MVHQCVRVTVLISCGVCIFLFGILVNFEEPLNYRSQANQNESLDVPTDCSSCESTSQRKLSL  
FLEDKRPACEKLYNRIASASNQWRSEEDVLRNIAKIHQCKWKGQKRAVENFRWELRKCCRT  
LSGSFVTQRNTPVGTTELFYEAEPKKIKITPSIFAIFPKDSPFRGRSIQRCAVVGNAAGILHN  
SSCGAEIDQADFVFRNLPMPGNGFTKDVGSKTHLVTANPKVIERIYAEHLKRRKPFANTLV  
IYNDALLLFPAFYHSKNTALSFRAYHTLQDFKSKQRVIFFNPIYLLKHLAHFWLSKGMQVQNL  
STGITVASMAMELCSEVWIYGFWPFSGKNTGELMSHHYFDSLLAEPDLHSTSNEFYQLLRMH  
SKGIVKLQMGQCEAEETDEFTLKP

>Amblat\_GT29\_ST8Sia6

MGARGMKMFTLLVFLSTCLLLLSFWITSGELPTSRDKQTKERNIFTNNSQPGHSQQKRNNGG  
ATTSKPDHHTSGSNLRSANSSVAFRFLKEDKLYLIQTNAQSNVAKVQLCKETQDRYLSATL

RKRYSEDFYIQSFRKVQNCTWTRRPEEYKFRSKLASCCNAVNNFIVSQNNTSLGNSMSYEV  
DNKKNIVISETIFKMLPQSQPFVVERSYKHCAVVGNGGILQNSSCGAEIDESDFVFRCNLPPV  
NGDFHKDVGNKTNVTVNPSIIALRYGKLSQKKTVFLQNTKYGDAYFLLPAFSYRSNTAVC  
FKVFNALKEAKANQKAIFFHPKYLKNLGQFWRANGVRAYRLSTGLMIASAAIELCDHVKLYG  
FWPFSKNTEGNLISHHYDNQLPKPGFHAMPKEFIQYLQLHNKGILKLQVGECENKTKI

>Lepocu\_GT29\_ST8Sia6

MRKALLMLLFSLTCLVIVGIMVTSLSNRSEAARGALKLVAGKQAATQCKEAREKANI  
DKLAQVHSQTRKQESRLQTFRAQLNMKCQGFSAIITQANTLLGSKVTYDGERRKPEVTP  
KLYSTFPKEHPFGNVSFQSCAVVGNGGILANS SCGEEIDGAQFVIRCNLPPVDRKYQDDVGN  
KTDLVTANPSILLERFEGLMELRRPFVESLGDYQPMALPAFSYGHNTPVSLRAVYTLQDF  
NSPVRAVFLNPEYLQNLARFWKAHGLRTVRLSTGLIVASLALCASCVTLYGFWPFSLHPFS  
KQHLTNHYYDDQOSKKSFHAMPAEFEQLLRLHSQGVIRVHLGSC

>Anofim\_GT29\_ST8Sia6

MRGHLLQSFFSLVITLFFLGSLMTTLIWYMVDTNNVKQPQRPSPOKKS DPQPSSELCKGCREVI  
NKVIERYSKTWKKQEENYQKFRSQLSSKCHGFDKAIITQANTPVGAKLVYDGEKKRTLQVTP  
EIFSTFAKEHPFQNKIWDTCVAVVGNGGILTNS SCGKTIDSAQFVMRCNLPPLDKGYEKHVGI  
KTDLVTANPSILLEKYGALMGRRRPFVESLRSYGNSLLLLPAFSFGFNTPVCLRAVYSIEDF  
ESPTRPVFFNPEYLQKLALFLRSQGLRAPRPSTGIIMASLALHCANVHLYGFWPFSSHPHG  
LHALTNHYYDDRQTKKKFHSMAPAEFDLLLQLHSQGVLRLLHLGDCPPGER

>Amical\_GT29\_ST8Sia6

MRRFIVKLLFSLMLCLFILGTVLMSFWYTFSSYSNVRVTHPAVKKTVSEKQNCREQSVIDRL  
LQTHIVDWEKQEHKFQSFRAQLNSRCDGLSKAIISQTNTPLGSKVVYDGEKRKPIQVTPKLF  
STFPKEHPFGNRTFTSCAVVGNGGILMNSSCGGEIDEAQFVIRCNLPPVDHGYQRDVGNKTS  
LVTANPSILLDKFNGLMELRRPFVDSLGSYGDPLLVLPAFSYSRNTPVSLRALYTLQDFDSP  
VRPVFLNPEYLHNLARFWKAQGLQAIRLSTGLIMASLALCANVQLYGFWPFKDPHSHKP  
LTNHYYDDQAKKTIHAMSTEFSHLLMLHNQGIIRVQLGKCQAGTRRATPSLHPPVSPLRH

>Sinans\_GT29\_ST8Sia6

MRVMRTLMLWLFVILLCSFCSVAFWIFLSNNNVI PHPSSRIPOKSSETKSKGCSKDNVLI  
AKALENYSHKWKKHEANFKRFRSLLSSKCHAVSKAVVTQNNTPLGNSVIYDGERRKPLQVTQ  
ALFNILAKEQPFGNATWESCAVVGNGGILANS SCGEEINSAQFVIRCNLPPLDNRYEKDVGN  
KTSLV TANPSILHEKYSGLMERRRPFVESLRPYQALLLPAFSYGHNTPVSLRAFYTTLEDF  
GSDSPLPVFLNPEYLRLSKFWRERGLNSVRPSTGLIMASLALICSNVHLYGFWPFNKHPN  
DSRPITNHYYDDRESKKNVHSMPTFEHLLKLHKQGVIRIHLGECQPT

>Sinrhi\_GT29\_ST8Sia6

MRVMRTLMLWLLPIILLCSFCSVAFWIFLSNNNVI PHPSSRIPOKSSETKSSKGCSKDNVLI  
AKALENYSHKWKKHEANFKRFRSLLSSKCHAVSKAVVTQNNTPLGNSVIYDGERRKPLQVTQ  
ALFNILAKEQPFGNATWESCAVVGNGGILANS SCGEEINSAQFVIRCNLPPLDNRYEKDVGN  
KTSLV TANPSILHEKYSGLMERRRPFVESLRPYQALLLPAFSYGHSTPVSLRAFYTTLEDF

GSDSPLPVFLNPEYLRRLKFWRERGLNSVRPSTGLIMASLALEICSNVHLYGFWPFNKHPN  
DSRPITNHYYDDRESKKNVHSMPTFEHLLKLHKQGVIRIHLGECQPT

>Sinans\_GT29\_ST8Sia6-B

MHVMRTLMLWLLPVIIFLCSFCSVAFWIFLSNNNVI PHPLSRIPQKRPEQTQSCKECKDSVLIA  
KALENYSKWKKEANLKRFRSLMSSKCHAVSKAVVTQNNTPLGSNVIYDGERRKPLQVTQA  
LFNILAKEQPFGNATWESCAVVGNGGILANS SCGEEINSAQFVIRCNLPLDKGYEKDVGKK  
TNLVTANPSILHEKYSGLMERRRPFVESLRPYGQALLLPAFSYGHNTPVSLRAFYTLEDFG  
SNSPLPVFLNPEYLRRLSKFWREQGLNSVRPSTGLIVASLALEICSNVHLYGFWPFKHPYD  
SQPITNHYYNDRESKKNVHSMNEFAHLLKLHKQGVIRIHLGECQPTH

>Cypcar\_GT29\_ST8Sia6

MRVMRTLMLWLLSIIILLCFCSVTFWIFLSNNNVNPRPSYKIPQKRQSCKECNDVLIKAL  
ENYSKWKKEQETNFKKFRSLLSNKCHAVSKAVVTQNNTPLGSNVIYDGERRKPLHVTQALFN  
ILAKEQPFGNATWESCAVVGNGGILANS SCGEEINSAQFVIRCNLPLDKGYEKDVGKNTNL  
VTANPSILHEKYSGLMERRRPFVESLRPYGQALLLPAFSYGHNTPVSLRAFYTLEDFGSNS  
PLPVFLNPDYLRRLSKFWRERGLNSVRPSTGLIVASLALEICSNVHLYGFWPFKHPYDSQA  
ITNHYYDNRESKKNVHSMPTFEYLLKLHNQGVIRIHLGKCQPTH

>Pygnat\_GT29\_ST8Sia6

MRVLLLRLLAVLSLASFCSVLLWFLSNSDAGLRGPRYTKKERADSIKPDSCKVCRENVIID  
KALRVYSSRWRRQEANFKRFRSLLSRNCHALS KAVVTQANTPVGSKLVYDGEKTKPLQVTS  
LFNTFAKEQPFGNATWDTCVAVVGNGGILANS SCGEEKINSADFI IRCNLPLGSGYEKDVGNQ  
TSLVTANPSILIEKFGLMERRRPFVESLRPYGDSLLVLPFSYGHNTPVSLRAFYTLEDFG  
ITSARPVFLNPEYLSLARFWRGQGLRSARLSTGLIVASLALELCTNVHLYGFWPFHQHPYG  
RQPITNHYYDDRQSKKNVHSMPEAFDHLRLHMVGVIQMHGACSM LNRTSN

>Onckis\_GT29\_ST8Sia6-A

MRGLFSFMLTLSILGTVLTALVWYFFSKHNVQPGRPPHKSHIMNSGPVPSRTCKGCRDTVTD  
KVVELYSHSWKKQEDKFRNFRSLLSNRCNGLTKAMVTQANTPLGSKVVYDGEKRKPLQVTPE  
LFSTFAKENPFVNTTWDTCVVGNGGILANS SCGEEKIDSAQFVIRCNLPLENGYERDVGNK  
TDLVTANPSILMEKYGGLQERRRPFVESLRSYGDSLMLLPAFSYGHNTPVSLRALYTIQDFD  
SPSRPVFLNPEYLQSLARFWGQGLRTRVRLSTGLIVASLALELCANVHLYGFWPFNEHPPRH  
QPLTNHYYDDRQSKKTVHAMP AEFDHLRLHTQGVLR IHLGECAPTARCRPSSPLILWVFIP  
VLYLSVCASSCLFKSTSVLSQCLLFP

>Esoluc\_GT29\_ST8Sia6

MRGLLKLLFSLMVILLILGTILTALLGYIFNNSVGPSPHQSQGN SGTSGTCKGCRDT  
TIIKVVVEHYSHSWKKQEDNFRKFRSLLRNTCHGLTKAVVTQSNTPLGSKVVYDGEKRKPLQ  
VTAE LFSTFAKEHPFNATWDTCVVGNGGILANS SCGERIDSAQFI IRCNLPLLANGYERD  
VGNKTDLVTANPSILQEKYKGLQEHRLPFVKSLHSYGDSFVLLPAFSYGHNTPLSLRALYTI  
QDFNSPSRPIFLNPEYLRSLARFWSQGLKTARLSTGLIVASLALELCANVHLYGFWPFHQH  
PQHHRPLTNHYYDDRQSKKTVHAMP AEFDQLQRLHNQGVLR LHLGECAPAAT

>Salsal\_GT29\_ST8Sia6

MRGLFSFMLTSLILGTVMTALVWYVFSNRNVQPGRLRHKSNIMNSGPVPSRTCKGCRDVTVE  
KVVERYSHSWKKQEDKFRNFRSLLSNRCHGLTKAMVTQANTPLGSKVVYDGEKRKPLQVTPE  
LFSTFAKENPFVNTTWDTCVVGNGGILANSSCGEKIDSAQFVIRC�LPLENGYERDVGNK  
TDLVTANPSILMEKYGGLQERRRPFVESLRSYGDSLMLLPAFSYGHNTPVSLRALYTIQDFD  
SPSRPVFLNPEYLQSLARFWQGQGLRTVRLSTGLIVASLALCANVHLYGFWPFNKHPHRH  
QNLTNHYYDDRQSKKTVHAMPDEFDHLRLHTQGVLRHLGECTPTASPGCSSKMAWASASV  
SGFSLPVGSLGSAMPTLVQHNTTSQTQKPWAGPNINVSGPSGLGQASEDPIQGSSEQRTK  
HRRGNRRRPGK

>Astmex\_GT29\_ST8Sia6

MRLLLLRLLGVLFITSFVSVLWHFLSNSAAGLHGPRYSERKAAGPIKPTTSRAVKDNAIID  
RLLKSYSRWKRREANFSKFRSLLSSSCHAVSKAVVTQSNTPVGSKVVYDGEKTKPLQVTKA  
LFSTFAKEQPFGNASWDTCVVGNGGILVNSSCAEKINSANLVIRC�LPPLNGYEKDVGNK  
TSLVTANPSILIEKFSGLMERRRPFVESLRPYGDSLMLLPAFSYSHNTPVSLRALYALEDFN  
AVGPRPVFFNPEYLSSLARFWRGRGLRTARLSTGLIVTSLALELCTNVHLYGFWPFSLHPHG  
RQITTNHYYDNRQSKKNVHSMPSFEFEHLLRLHVSQVLIQLHLGECSTTDLNHTEKT

>Salalp\_GT29\_ST8Sia6

MRGLFCFLLTSLILGTVLTALVWYVFRDRNVQGRPPHKDPIMNSGPVPSGTCKGCRDVTVE  
KVVERYSHSWKKQEDKFRNFRSLLSNRCHGLTKAMVTQANTPLGSKVVYDGEKRKPLQVTPE  
LFSTFAKENPFVNTTWDTCVVGNGGILANSSCGERIDSAQFVIRC�LPLENGYERDVGNK  
TDLVTANPSILMEKYGGLQERRRPFVESLRSYGDSLMLLPAFSYGPNTPVSLRALYTIQDFD  
SPLRPVFLNPEYLQSLAHFWQGQGLRTVRLSTGLIVASLALCANVHLYGFWPFNEHPPHRH  
QPLTNHYYDNRQSKKTVHAMPDEFDHLRLHSQGVLRHLGECAPAAR

>Cluhar\_GT29\_ST8Sia6

MKLVLKLLLSLMLIVVALGSFFTLLLWIVSSESDTTPRSPFHVKKSPLDLDCTGCRDSVID  
KVLERYSKNWKQENNYKRFRALLSSRCHGATKAVVTQANTPLGSKVVYDGEKRKPLQVTSAL  
LFNVFPKEPPFGNTSWDTCVVGNGGILANSSCGRRIDSAQFVIRC�LPLEHGYEEDVGNK  
TDLVTANPSILHEKFGLMERRRPFVEGLRPYGNLILLPAFSYSHNTPVSLRAVYTLEDFR  
SPARPVFLSPDYLTSLARFWSQGLRSVRLSTGLIVASLALCANVHLYGFWPFHQHPHG  
QPLTNHYYDNRETKKKIHAMPADEFDHLRLHGQGILRVHLGQCPRSDG

>Notfur\_GT29\_ST8Sia6

MRGHLLKPLLSLMFVGSLLTMLIWTLDNNNVDPNPQAKTEPQSSASCKDCREDIKKALEL  
YSQTWKKQEDSYQNFRSLLNRKCKCFDKAIITQNNTPLGSKLVYDGERKRTLQVNQEIFNTF  
PKGHPFSNKTLHTCAVVGNGGILANSSCGKTIDSAEFVIRC�LPPLSNGYEKHVGIKTHLVT  
ANPSILMEKYAALMARRRPFVENLRSYGDSLMLLPAFSYGRNTPVSLRAFYTLEDFESPIQS  
IFFNPAYLRNLAAFWSQGLKAVRLSTGIIMTSLALEICENVHLYGFWPFVHPYSSQDLTN  
HYYDDRKTIKKFHAMPDEFNLLNLHSQGVLMHLGDCEPDEKRFHRSD

>Serlaldor\_GT29\_ST8Sia6



MRGQLLKTFLSLMITLLFVGSLLTTFIWFMFNDNNVEPHRTNPQKKSAPQSSDPCKGCREII  
DNVIERYSQTWKKQEDNYQKFRSQLNSKCRGFNKAIITQANTPVGSKLVYDGEKRRSLQVTP  
EIFSTFVKEHPFSNKTWGTCAVVGNGGILTNSSCGQTIDSAQFVIRC�LPPLKNGYEKHVGN  
KTDLVTANPSILVEKYGALMAHRRPFVDSLHTYGNLLLLPAFSFGHNTPVSLRAAYTIEDF  
GSPKPVFFNPEYLQRLAVFWRSQLRAVRLSTGIIMASLALCADVHLYGFWPFSTHPHG  
FHPLTNHYYDDRKTMMKFHAMPAEFDLLLRLHSQGVRLHLGDCRPHEK

>Larcro\_GT29\_ST8Sia6

MRGLLKSFLSLAITLLCLGSLTTFIWYMFHDHNNVEPRKPHPQKKSTPQSSEICKGCREVID  
KVMERYSQSWERQEDNYQKFRAQLNNKCHGFDKAIITQANTPVGSKLAYDGEKKRILQVTPE  
IFSTFAKERPFPNKTWDTCAVVGNGGILTNSGCGKVIDSAQFVIRC�LPPLNGYEKHVGIK  
TDLVTANPSIFLEKYGGLMGRRRPFVESLHSYGNLLLLIPAFSYGHNTPVSLRVAYSLEDFK  
SSTRPIFFNPEYLHSLALFWRSQGLRAVRLSTGIIMASLALCANVDLYGFWPFNSHHPHG  
HTLTNHYYDDRQTKVKFHAMPAEFELLRLHSQGVRLHLGDCQPSEK

>Paroli\_GT29\_ST8Sia6

MRGQLLKSLSMMITLLFVGSLLTTLIWYVFNDNNVQPQELHPQKKSAPQSDPCKGCREII  
DKVIQRYSQTWKRQEDNYQKIRSQLSSKCHGFDKAIITQANTPVGSKLVYDGEKKRTLQVTP  
EVFSTFIKERPFNKTWDTCAVVGNGGILTNSSCGQMIDSAQFVIRC�LPPLNGYEKHVGT  
KTDLVTANPSILMEKYGALMGRRRPFVESLRIYGDSLLLLIPAFSYGHNTPVSLRVVYTIEDF  
ESPTRPIFFNPEYLQSLAVFWRSQLKAVRLSTGIIMASLALCNSVHLYGFWPFNSHHPHG  
LHVLNNHYYDDRKTCTKFHAMPAEFDLLLRLHSQGALRLHLGDC

>Ampace\_GT29\_ST8Sia6

MRGQLLKSFLSLMVTLLFLGSLFTSLIWFMFISNNVEPHRPPQKKNAPQHSDPCKGCREVID  
KVVARYSQPWKRQEDSYQKFRFQLSSKCHGFNKAIITKTNTPVGSKLVYDGEKKRTLQVTPE  
IFSTFIKDHPFSNKTWDTCAVVGNGGILTNSSCGKTIDSAQFVIRC�LPPLANGYEKHVGVK  
TDLVTANPSILLEKYGALMGRRRPFVESLRTYGDSLLLLPAFSFGHNTPVSLRAAYTIEDFE  
SPTRPVFFNPEYLHSLALFWRSQGLKAVRLSTGLIMASLALCNSVHLYGFWPFNSHHPHGL  
QPLTNHYYDNRQTKTKFHAMPAEFDLLLRLHSQGVRLHLGDCPTSGK

>Angang\_GT29\_ST8Sia6

MRGLLLKLLFSLMLCLFILGTVLTAHVWYVFSYSDVKPRSSPSQVRKSPESDTSACKDCREY  
TIDKMVELYSYAWKKQANFNKFRSQLSSRCRGVSTAIVTQNNTPLDISKIYDGEKRPLOV  
TPKLYSTFAKEQPFENVWKTCAVVGNGGILVNSSCGEAIIDSAHFVIRC�LPPLDKAYQKDV  
GNKTNLVTANPSILIEKFEGLMEYRRPFVESLSDYGEALLLPAFSYAHNTPVSLRAFYTTLR  
DFGGRARPAFLSPAYLQSLAHFWRAQGLRTVRLSTGLIVASLALCANVHLYGFWPHAQHP  
HRRRPLTNHYYDDRQGKKKVHAMPAEFGHLLRLHRQGVVRVHLGQCEDRPR

>Orenil\_GT29\_ST8Sia6-B

MRGQLSKSLMITVFLGSLMTTLIWYMSVGKHVEPQRPASQKHKHAPKPSEICKGCKEIIISKV  
QERYNQTWKKQEDNYLKFRTNLSVKCNGFDKAIITKNNTPVGLKLVYDGEKKRTLQVNKDF  
NIFTKENPFNKKWDTCSVVGNGGILSESSCGKMIDSADFVIRC�LPPLNGYEKDVGIKTS

LVTANPSIFTQRYGSLVGRRLPFVESLHXYGNSLLLLPAFSFGINTAVCQRVAYTIEDFKSP  
IRPVFFNPQYLDLSLAQFWRSEGLKERRLSTGLIMASMALELCENVHLYGFWPFNSHPYGFYT  
LTNHYYDDKPAKTSFHAMPAEFDRLQLHTEGVLRLHLEDCK

>Litcat\_GT29\_ST8Sia6

MRRSGLIILLGTSLLLVLITVWLAIGEAPRYRRIQAVLDAKHHFGLHLSIRPTQQDKSEGSTH  
LSHQFIWSGKKPGNITTRVGLVKPEVSHIIPAHNYTASFFCRDVQDRLLSVSLRKRYSEDYY  
IQAVNDVQNTWKKKQPQEYSRFRLYLSSCCNAVNNFIVSQNNTSLGSNITYEVESKKNILIA  
EDIYKMLPKSQPFDPGIPFKQCAVVGNGGILKNSSCGAEIDQSDVFVRCNLPPIWGNVSIIDVG  
NKTDLVTVNPSIIALKYGKLNMDKTAFLKNLTNYGYSFLLLPAFSYSSNTAISFEVHLLLRK  
YQAKQKAIFHPNYLKSLSAQFWKGRGVRAYRLSTGFMITSAAIELCQDVTLYGFWPFKSKNLD  
GKPISSHYYDNQLPKPGFHAMPKEFYQVLQLHHKGVLLKQLGCECEKR

>Onctsh\_GT29\_ST8Sia6

MRGLFSFMLTSLILGTVLTALVWYFFSKHNVQPGRTPHKSHIMNSGPVPSRTCKGCRDVTVD  
KVVELYSHSWRKQEDKFRNFRSLLSNRCHGLTKAMVTQANTPLGSKVVYDGEKRKPLQVTPPE  
LFSTFAKENPFVNTTWDTCVVVGNGGILANSSCGEKIDSAQFVIRCNLPPENGYERDVGNK  
TDLVTANPSIILMEKYGGLQERRRPFVESLRSYGDLSMLLPAFSYGHNTPVSLRALYTIQDFD  
SPSRPVFLNPEYLQSLARFWQGLRTRVRLSTGLIVASLALCANVHLYGFWPFNEHPPHRH  
QPLTNHYYDDRQSKKTVHAMPAEFDHLLRLHTQGVLRIHLGECAPTASPGCSSKMAWAPASV  
SGLSLPVGSLGSAMPTLVQRNNTTSQSQKPWAGPDTNVSGPSGLGQGASEDPTQGSEQRTKHR  
TGNRRRPGK

>Hetzeb\_GT29\_ST8Sia6

MAASKCTLGIILLSCGIFILCAIFVVNFEPQPSNYRLQGNDTERKGIHYSGKTAGDRGCDKCT  
YSQVQNFWPLQQKNFTACERIYWEIASSPIQWKTEKDVIKSVAKLQKCQWHKQEVAAEELRS  
ELKRCCHAAAYNYLVTQKNMPVGTELIYDAESKNKINITPQIFSIFFPKNSFFSQRQYRRCABI  
GNGGILANSSCGAEIDQADVFVRCNLPMPGGEFTRDIGTKTNLVTANPSIILERYAKLQDRR  
RSFFTNLAVYDEALLLLPAFSYSKNTDLCFRALYTLQDFQAKQKVVFNPVYLKKNLANFWLS  
KGIQVKRLSTGIMIVSVAVELCEEVWIYGFWPFGRNVEGKVVSHHYFDNLLPKPDTHSMPL  
FHLLQMHKGMIKLQMTQCQADPK

>Squaca\_GT29\_ST8Sia6

MASICALRIMVLSCGICIFLCGILVVNFEEPLNYRYMVQLSKLKLNYVFGSNLQVNDSEGKR  
INDSEKTGGDQDCEKCTYRQTEEEVIKTVAQLQQCQWHKQELEAEKFRSELKRCCYAADGL  
VTQRNTPVGTELTIDAEPKKKIKITHPIFTIFPKDSAFSSRQYRRCABIGNGGILANSSCGA  
EIDQADVFVRCNLPVGGDFAQDVGTKTNLVTANPSIIAERYAELHDRRKPFFTNTLVYNEA  
LLLLPAFSYTKNTVLCFRALYTLQDFQAKQKVVFNPVYLKHLTEFWLSKGIQVNRLSTGIM  
VVSVAIELCEEVWIYGFWPFGRNVEGRVMSHHYFDNLLPKPDVHSMPSEFHQLLQMHKGI  
KLQTAQCQADPKEMGNI

>Ambmex\_GT29\_ST8Sia6

MGARGMKMFTLLVFLSTCLLLLSFWITSGELPTSRDKQTKERNIFTNNSQPGHSQQLKRNGG  
ATTSKPDHHTSRSNLRSANSSVAFRFLKQDKLYLMQNAQSNVAVVQLCKETQDRYLSATL  
RKRYSEDFYIQSFRKVQNTWTRRPEEYKFRSKLASCCNAVNNFIVSQNNTSLGNSMSYEV  
DTKKNIVISETIFKMLPQSQPFFVERSYPKCAVVGNGGILQNSSCGAEIDESDFVFRCNLPPV  
NGDFHKDVGNKTNVVTVNPSIIALRYGKLSQKKTVFLQNI TKYGDAYFLLPAFSYRSNTAVC  
FKVFNALKEAKANQKAIFFHPKYLKNLGQFWRANGVVRAYRLSTGLMIASAAIELCDHVKLYG  
FWPFSKNTEGNLISHHYDNQLPKPGFHAMPKEFIQYLQLHNKGILKLQVGEENKTKI

>Rhimar\_GT29\_ST8Sia6

MKRSAGILLTCLLLLLLTGWLTI RDPPHYRPGNITTRVGLVKPEVNHLISTPNNYTTDLFC  
RDIPDRLLTVSLRKRYSEDCYIQAVNEVQNTWQKKPQEYSRFRFYLSGCCNAVNNFIVSQN  
NTSLGNSNITYEVESKKNILIAEDIYKMLPKSQPFEGIPFKQCAVVGNGGILTNSCCGAEIDR  
SDFVFRCNLPPPIWGNAAVDVGNKTDLVTVNPSIIALKYKLNEMKTAFLRNLT SYGGSFLLL  
PAFSYSSNTAISFEVHNLLKKYQAKQRAIFFHPNYLKSQAQFWRGRGVRAYRLSTGFMITSA  
AIELCEDVKLYGFWPFSKNPNGKPI SHHYDNQLPKPGFHAMPKEFYQVLQLHYKGVKLQI  
GECQKR

>Latmen\_GT29\_ST8Sia6

MWMCRMKRCILLWILLASGVFFLLTFWIKYDAALHYREIANKDWRDCLATACGGRRGMRELE  
SAVSPHRPLPTSNSNNTNONGSTFNKLNLLKADSSSCKELHNRMSATTPRKRYSDDYIQT  
NELQKCSWVIRPEEHEKFRSELSVCCNAVRNFIVSQNNTPLGTNMSYEVENGRFTLITQRI  
KMFPQSQPFAGYPYNQCAVVGNGGILKNSACGTEIDQADFVFRCNLPPTLGNISIDVGSKTS  
LVTLNPSIIITHRFKLNKRKPFVETVSHYGEAFLLLPAFSFRSNTALSFKVYHTLEAFRGK  
QKTIFFHPKYLKSLALFWRSKGIKVYRLSSGFMIANAARRLCKEVRLYGFWPFSSKNNEGKNI  
SHHYDNQLPKPGIHSMPKEFYHFLKLHNKGI IKLQFGRCBIT

>Homsap\_GT29\_ST8Sia1

MSPCGRARRQTSRGAMAVLAWKFPRTRLPMGASALCVVLCWLYIFPVYRLPNEKEIVQGV  
LQQGTAWRRNQTAARAFRKQMEDCCDPAHLFAMTKMNSPMGKSMWYDGEFLYSFTIDNSTYSL  
FPQATPFQLPLKKCAVVGNGGILKKS GCGRQIDEANFVMRCNLPLSSEYTKDVGSKS  
QLVTANPSIIRQRFQNLWSRKT FVDNMKIYNHSYIYMPAFSMKTGTPEPSLRVYYT  
LSDVGANQTVLFANPNFLRSIGKFWKSRGIHAKRLSTGLFLVSAALGLCEEVAIYGF  
WPFSSVMHEQPI SHHYDNVLPFSGFHAMPEEFLQLWYLHKIGALRMQLDPCEDTSLQPTS

>Musmus\_GT29\_ST8Sia1

MSPCGRALHTSRGAMAMLARKFPRTRLVPGASALCVVLCWLYIFPVYRPPNEKEIVQGV  
LAQSTAWRTNQTASALFRRQMEDCCDPAHLFAMTKMNSPMGKSLWYDGEFLYSFTIDNSTYSL  
FPQATPFQLPLKKCAVVGNGGILKMSGCGRQIDEANFVMRCNLPLSSEYTRDVGSKTQLV  
TANPSIIRQRFENLLWSRKKFVDNMKIYNHSYIYMPAFSMKTGTPEPSLRVYYT  
LSDVGANQTVLFANPNFLRNIGKFWKSRGIHAKRLSTGLFLVSAALGLCEEVSIYGS  
WPFSSVMQGDPI SHHYDNVLPFTGYHAMPEEFLQLWYLHKIGALRMQLDPCPEE  
PSPQPTS

>Ratnor\_GT29\_ST8Sia1

MSPGGGPLHTSRGAMAMLARKFPRTRLPVGASALCVVVLWCWLYVFPVYRLPNEKEIVQGVLA  
QRTAWRRNQT SARLFRKQMEDCCNPAHLFAMTKVNSPMGKSLWYDGEFLYSLTIDTSTYSLF  
PQATPFQLPLKKCAVVGNGGILKMSGCGRQIDEANFVMRCNLPLSSEYTRDVGSKTQLVTA  
NPSIIRQRFENLLWSRKKFVDNMKIYNHSYIYMPAFSMKTGTEPSLRVYYTLKDAGANQTVL  
FANPNFLRNIGKFWKGRGIHAKRLSTGLFLVSAALGLCEEVSIYGFWPFVSNMQGEPISHHY  
YDNVLPFSGFHAMPEEFLQLWYLHKMGALRMQLDPCENPPSPQPTS

>Macmul\_GT29\_ST8Sia1

MSPCGRARRQTSRGAMAVLAWKFPRTRLPVGASALCVVVLWCWLYIFPVYRLPNEKEIVQGVLA  
QQGTAWRRNQTAAARAFRKQMEDCCDPAHLFAMTKMNSPMGKSMWYDGEFLYSFTIDNSTYSL  
FPQATPFQLPLKKCAVVGNGGILKMSGCGRQIDEANFVMRCNLPLSSEYTKDVGSKSHLVT  
ANPSIIRQRFQNLWSRKT FVDNMKIYNHSYIYMPAFSMKTGTEPSLRVYYT LSDVGANQTV  
LFANPNFLRSIGKFWKSRGIHAKRLSTGLFLVSAALGLCEEVAIYGFWPFVSNMHEQPISSH  
YYDNVLPFSGFHAMPEEFLQLWYLHKIGALRMQLDPCEDTSLQPTS

>Bostau\_GT29\_ST8Sia1

MSPCGRARRHTSRGAMAVLAWKFPRTRLPVGASALCVVVLWCWLYVFPVYRLPDEKEIVQGVLA  
QQGTAWRRNR TAAGIFRKQMEDCCDPAHLFAMTKMNAPMGKSLWYDGEFLYSFTIDNSTYSL  
FPQATPFQLPLKKCAVVGNGGILKMSGCGRQIDEAD FVMRCNLPLSSEYTKDVGSKSHLVT  
ANPSIIRQRFQNLWSRKT FVDHMKVYNHSYIYMPAFSMKTGTEPSLRVYYT LSDVGANQTV  
LFANPNFLRSIGKFWKSRGIHAKRLSTGLFLVSAALGLCEEVAIYGFWPFVSNMHEQPISSH  
YYDNVLPFSGFHAMPEEFLQLWYLHKIGALRMQLDPCEDNSLQPTS

>Canlupfam\_GT29\_ST8Sia1

MSPCGRARRHTSRGAMAILAWKFPRTRLPVGASALCVVVLWCWLYIFPVYRLPNEKEIVQGVLA  
QQGTAWRRNQTAAARVFRKQMEDCCDPAHLFAMTKLNSPMGKSMWYDGEFLYSFTIDNSTYSL  
FPQATPFQLPLKKCAVVGNGGILKMSGCGRQIDEANFVMRCNLPLSSEYTKDVGSKSHLVT  
ANPSIIRQRFQNLWSRKT FVDNMKIYNHSYIYMPAFSMKTGTEPSLRVYYT LSDVGANQTV  
LFANPNFLRSIGKFWKSRGIHAKRLSTGLFLVSAALGLCEEVAIYGFWPFVSNMHEQPISSH  
YYDNVLPFSGFHAMPEEFLQLWYLHKIGALRMQLDPCEDTSLQPTS

>Galgal\_GT29\_ST8Sia1

MAGLAWKWPRTRLPVGASALGVFVLCWLYIFPVYRLPDEKEIVQGVLMQQGKAWRRNHTAVA  
VFRKLLDCCDPGQLFAMTKQNSPMGKNLWFDGEFLYSFTIDNTTYSLFPQATPLQLPLKKC  
SVVGNGGILKMSGCGKQIDQADFVMRCNLPLSREYSKDVGLKTQLVTANPSIIQKRFQNL  
WSRKAFVDSVKVYNHSYIYMPAFSMKTGTGPSLRVYYTLKDFGAKQAVLFANPNFLRDIGKF  
WKNKGIHAKRLSTGLFLVSAALGLCEEVTIYGFWPFVSDLHGKFI SHHYDNVLPD SGFHAM  
PEEFLQLWFLHKSGVLRMQLEQCEDPLTQSSA

>Xenlae\_GT29\_ST8Sia1

MWGRWRGAGGRRGVAQPVIPQMKLLGGRVPLGASALGLLIVCWFYIFPGERLPGHKEMIRQ  
VLQFGPRWGRNRSSGDSFRKLLQCCDPPRLFSMTKANTALGENLWYDGEFFQSLTIDNTTR  
SLFPQDTPIKLPKRC SVVGNGGILKNSRCGEQIDEAD FVMRCNLPLSREYTD DVGTKTQL

VTVNPSIIDKRFQNL LWSRKS FVESVSVYKQSYVYMPAFSTKRGTDP SLRVYYTLEDFGTNQ  
TVL FANPNFLRN V GKFWKSKGVH SKRLSTGLFMVSAALS LCEEVTIYGFWPFQMDLGGRRHIS  
HHYYDNMLPLSGVHAMPEEFLQLWHLHKSGVLQMQLDQCKKDVSSKKPH

>Siltro\_GT29\_ST8Sia1

MKLQGSRMWLCPRTRL PVGASALGFLILCWLYVFPYRLPGHKEMVREVLRF GPGWRKNRTE  
MDSFRKLLQDCCDPPHLFSLTKVNTPLGENLWFDGEEFFHSLTIDNSTRSLFPQDTPFKLPLK  
RCSVVGNGGILKNSRCGEQIDEADFMRCNLPPLSREYTEDVGTTRTQLVTVNPSIIDKRYQN  
LLWSRKS FVENLRVYQQSYVYMPAFSTKRGTDP SLRVYYTLADFGTNQTVL FANPNFLRN V G  
KFWKSRGIH SKRLSTGLFMVSAALS LCEEVTIYGFWPFQMDLGGRYISHHYYDN TLPLSGVH  
AMPEEFLQLWLLHKSGVLQMQLDQCKKDVSSQKPH

>Takrub\_GT29\_ST8Sia1

MLARCCRGKLSVWAGVCVLVLCWFYIFPGYRLPADKEIVDEVLRQGEAWQKNQTGIDL YRKL  
LTECCDPPRMFAVTKQNSPLGKVMWYDGEFYHSHTVNNETYPLFVQENPLQLPLKKCAVVG N  
GGILRGSKCGKDIDRADFIMRCNLPPLSKEYLEDVGT KTHLVTANPSIIENRFQNL LWSRKH  
FVDSMKVYGT SYIYMPAFS MSPGTNPSLRAYYALADASANLTMLFANPEFLRSV GKFWKARN  
VHAKRLSTGLFMVSLALALCKEVTVYGFWPF AIDLDEQPVS HHYYDNILPYKWFHTMPEEFV  
QLWHLHKSGTLRMRVGRCP PEDGGR

>Tetnig\_GT29\_ST8Sia1

MLARCCRGKVS VWAGVCVLVLCWFYIFPGYRLPGDKEIVA EVLRQGEAWHRNQTGIDL YRRL  
LTDCCDPPKMF AVTKRNSPLGKVMWYDGEFYHSHTVNNETYRLFVQDNPLQLPLKKCAVVG N  
GGILRASKCGKDIDQADFIMRCNLPPLSEEYLEDVGT KTHLVTANPSIIENRFQSLLWSRKH  
FVDSIKVYGT SYIYMPAFS MRPGTEPSLRAYYALADTSSNLTVL FANPEFLRTV GKFWKARN  
VHAKRLSTGLFMVSLALALCEEVTVYGFWPF AIDLDEQPVS HHYYDNILPYKWFHTMPEEFV  
QLWHLHKSGTLRMRVGRCSSQGGGR

>Gasacu\_GT29\_ST8Sia1

MLVRCYRGKLSVWAAMCVLVLCWFYVFPVYRLPRDKDIVEEV LKQGGVWQKNQTGIDL YRKL  
LTECCDPPRMFAVTKENSPTGKVLWYDGEFYHSHTVNNETYPLL VKDNPLRLPLKKCAVVG N  
GGILRHSQCGRDIDQADFLRCNLPPLSKEYVDDVGT RTHLVTANPSII EKRFQNL LWSRKV  
FVDSMKVYGSYIYMPAFS MKTGTDPSLRAYHALADSSSNLTMLFANPEFLRTVGRFWKARG  
VHARRLSTGLFLVSLALGLCEEVTAYGFWPF SVGLDEQPVS HHYYDNILPYTW FHAMPEEFV  
QLWHLHKSGALRVRVGRCSAQGGGG

>Danrer\_GT29\_ST8Sia1

MVSLRCHRSKYIWATLGV LALLWLYIFPVYRIPSDKEMVEEVLRQGTW SRNQTAVELYRKL  
LTDCCNPKRMFAVTKENSPLGKVLWYDGEFYHYHTVTNETYPIFVQDTP LQLPLKRC SVVG N  
GGVLKHS GCGNEIDRADFIMRCNLPPLSKDYTD DVGT KTHLVSANPSII EKSFQNL LWSRKS  
FVESMKAYGSSYIYIPAFS MKPGTDPSLRAYHALADSSSNQTVL FANPDFLKNVGI FWKNHG  
VHGKRLSTGLFLVSLALGLCEEVTAYGFWPF SVGLDERPVSHHYYDNILPSSRFHAMPEEFL  
QLWHLHKSGTLRMRVGS CAKERMELKREK

>Anocar\_GT29\_ST8Sia1

GPRTRLPVG TNALGFFFFVLCWLYVFSVYHLPGEKEIMCGMRLQQKCKAWQRGHAAHAFRKL  
LKECCDPGQLFAMTKENSPVGKNLWYDGEFLYSFTIDNETFSLFPKATPFQLPLKKCSVVG  
GGILKKSNCGRQIDQADFVMRCNLPPLTSEYSKDVGSKTQLVTANPSIIKKRFQNLWSRKA  
FVDSVKVYNQSYIYMPAFSMKAGTEPSLRVYYTLADV GARQTVIFANPNFLRDIGKFWKSKG  
IHGKRLSTGLFLVSAALGMCEEVTIYGFWPF SMDLHG NFI SHHY YDNILPDSGFHAMPEEFL  
QLWFLHKSGVLRMQLEHCEDSIFHPAS

>Calmil\_GT29\_ST8Sia1

MNRDSALPPRSVFCFTTMWSIWKCYRSRLPVGAALCVFVLCWLYVFPVYRIPDQKEIVNDVL  
HQPVWRRNQ TATTA FRRLLENC CETKRMFAVTQHNSPMGKNLWFDGEFLHLSLVNNEMFAMF  
PQDTPFQIPLKKCSVVGNGGILKRSACGDKIDKADFVMRCNLPPLSNEYARDVGHRTQLVTA  
NPSIIKKRYQNL MWSRKAFVESMKVYGRSIIYMPGF SMKAGTEPSFRTYYT LSDV N ANQTII  
FANPDFLRNVQKFWKGGVHAKRLSTGLFLV SVALGLCEEVTLYGFWPFSTDLEERTISHHY  
YDNVMPDTSYHAMPEEFLQLWLLHKSGILKIHVGKCGQIPM

>Pantro\_GT29\_ST8Sia1

MSPCGRARRQTSRGAMAVLAWKFPRTR LPMGASALCVVLCWLYIFPVYRLPNEKEIVQGV  
QQGTAWRRNQTAARAFRKQMEDCCDPAHLFAMTKMNSPMGKSMWYDGEFLYSFTIDNSTYSL  
FPQATPFQLPLKKCAVVGNGGILKKS GCGRQIDEANFVMRCNLPPLSSEYTKDVGSKS QLVT  
ANPSIIRQRFQNLWSRKT FVDNMKIYNHSIIYMPAF SMKTGTEPSLRVYYT LSDV GANQTV  
LFANPNFLRSIGKFWKSRGIHAKRLSTGLFLVSAALGLCEEVAIYGFWPF SVNMHEQPI SHH  
YYDNVLPFSGFHAMPEEFLQLWYLHKIGALRMQLERCEDTSLQPTS

>Orylat\_GT29\_ST8Sia1

MLARCYRAKLSVWAALCVLVLCWFYVFPGYRLPRDKDIVAEVLRQGDVWRKNQTGIDL YRDL  
LTKCCNPKMFAVTKENSPIGKVLWYDGEIYHSHTVNSETYQLFIKRRGAASSCRRC AVVGN  
GGILKGSKKGKEIDHHHYIFRCNLPPLSREYVEDVGT KTHLVTANPSII EKRFQNLVWSRKT  
FVDSMKVYGSSYIYMPAFSMAPGTDPSLRAYFALTDVPSNL TMLFANPDFLLSVSKFWKAHG  
VHARRLSTGLFLVSLAMGLCDEVTTYGFWPF SVDLDEQPI SHHY YDNILPYKWFHAMPEEFV  
QLWHLHKSGILRMKVGHCSPQN

>Homsap\_GT29\_ST8Sia3

MRNCKMARVASVLGLVMLSVALLI LSLISYVSLKKENIF TTPKYASPGAPRMYMFHAGFRSQ  
FALKFLDPSFVPITNSLTQELQEKPSKWKFNRTAFLHQRQEILQHVDVIKNFSLTKNSVRIG  
QLMHYDYSSHKYVFSISNNFRSLLPDVSPIMNKHYNICAVVGNSGILTFIQCGREIDKSDFV  
FRCNFAPSEAFQRDVGRKTNL TTFNPSILEKYNNLLTIQDRNNFFLSLKKLDGAILWIPAF  
FFHTSATVTRTLVDFFVEHRGQLKVQLAWPGNIMQHVNRYWKNKHLSPKRLSTGILMYTLAS  
AICEEIHLYGFWPF GFDPNTR EDLPYHYDKKGT KFTTKWQESHQLPAEFQLLYRMHGEGLT  
KLTL SHCA

>Pantro\_GT29\_ST8Sia3

MRNCKMARVASVLGLVMLSVALLNLSLISYVSLKKENIFATPKYASPGAPRMYMFHAGYRSQ  
FALKFLDPSFVPIITNSLTQELQEKPSKWTFNRTAFLHQRQEILQHVDVIKNFSLTKNSVRIG  
QLMHYDYSSHKYVFSISNNFRSLLPDVSPIMNKHYNICAVVGNSGILTGSQCGQEIDKSDFV  
FRCNFAPTEAFQRDVGRKTNLTTFNPSILEKYNNLLTIQDRNNFFLSLKKLDGAILWIPAF  
FFHTSATVTRTLVDFFVEHRGQLKVQLAWPGNIMQHVNRWKNKHLSPKRLSTGILMYTLAS  
AICEEIHLYGFWPFQFDPNTREDLPYHYDDKKGTFKFTTKWQESHQLPAEFQLLYRMHGEGLT  
KLTLSHCA

>Musmus\_GT29\_ST8Sia3

MRNCKMARVASVLGLVMLSVALLILSLISYVSLKKENIFTTPKYASPGAPRMYMFHAGFRSQ  
FALKFLDQSFVPIITNSLTHELQEKPSKWTFNRTAFLHQRQEILQHVDVIKNFSLTKSSVRIG  
QLMHYDYSSHKYVFSISNNFRSLLPDVSPIMNKRYNVCVVGNSGILTGSQCGQEIDKSDFV  
SRCNFAPTEAFHKDVGRKTNLTTFNPSILEKYNNLLTIQDRNNFFLSLKKLDGAILWIPAF  
FFHTSATVTRTLVDFFVEHRGQLKVQLAWPGNIMQHVNRWKNKHLSPKRLSTGILMYTLAS  
AICEEIHLYGFWPFQFDPNTREDLPYHYDDKKGTFKFTTKWQESHQLPAEFQLLYRMHGEGLT  
KLTLSHCA

>Ratnor\_GT29\_ST8Sia3

MRNCKMARVASILGLVMLSVALLILSLISYVSLKKENIFTTPKYASPGAPRMYMFHAGFRSQ  
FALKFLEPSFVPIITNFLTHELQEKPSKWTFNRTAFLHQRQEILQHVDVIKNFSLTKNSVRIG  
QLIHYDYSSHKYVFSISNNFRSLLPDVSPILNKRYNICAVVGNSGILTGSQCGQEIDKSDFV  
FRCNFAPTEAFHKDVGKKTNLTTFNPSILEKYNNLLTIQDRNNFFLSLKKLDGAILWIPAF  
FFHTSATVTRTLVDFFVEHRGQLKVQLAWPGNIMQHVNRWKNKHLSPKRLSTGFLMYTLAS  
AICEEIHLYGFWPFQFDPNTREDLPYHYDDKKGTFKFTTKWQESHQLPAEFQLLYRMHGEGLT  
KLTLSHCA

>Bostau\_GT29\_ST8Sia3

MRNCKMARVASVLGLIMLSVALLILSLISYVSLKKESIFTTPKYANPGAPRMYMLHAGFPNL  
RLEKLLDSSLVPPHVSVTHELQARPKWTFNRTAFLHQRQEILQHVDVIKNFSLTKNSVRIGQ  
LMHYDYSSHKYVFSISNNFRSLLPDVSPIVNKRYNICAVVGNSGILTGSRCGPQIDKSDFV  
RCNFAPTEAFQRDVGRKTNLTTFNPSILEKYNNLLTIQDRNNFFLSLKKLDGAILWIPAFF  
FHTSATVTRTLVDFFVEHRGQLKLQLAWPGNIMQHVNRWKNKHLSPKRLSTGILMYTLASA  
VCEEIHLYGFWPFQFDPNTREDLPYHYDDKKGTFKFTTKWQESHQLPAEFQLLYRMHGEGLT  
LTLSHCA

>Canlupfam\_GT29\_ST8Sia3

MSHYKMARVASVLGLVMLSVALLILSLISYVSLKKENIFTTPKYANPGAPRMYMFHAGFRSQ  
FALKFLDPSVPIITNSLTHELQEKPSKWTFNRTAFLHQRQEILQHVDVIKNFSLTKNSVRIGQ  
LMHYDYSSHKYVFSISNNFRSLLPDVSPIVNKHFNICAVVGNSGILTGSRCGQEIDKSDFV  
RCNFAPTEAFQRDVGRKTNLTTFNPSILEKYNNLLTIQDRNNFFLSLKKLDGAILWIPAFF  
FHTSATVTRTLVDFFVEHRGQLKVQLAWPGNIMQHVNRWKNKHLSPKRLSTGILMYTLASA  
ICEEIHLYGFWPFQFDPNTREDLPYHYDDKKGTFKFTTKWQESHQLPAEFQLLYRMHGEGLT  
LTLSHCA

>Galgal\_GT29\_ST8Sia3

MVRVASVLGLVMLSIALLLILSLISYVSLKKNIFGAPRAAGPGGPRMYMFHAGFRSQFALKF  
LDPSFVPIITNSLGQELQEKPSKWFNRTAFAQQRQEILQHVDVIKNFSLTKNSVRIGQLMHY  
DYSSHKYVFSISNNFRSLLPDVSPILNKHYNVCAVVGNSGILTGSCGQOEIDKSDFVFRCNF  
APTEAFQKDVGRKTNLTTFNPSILEKYNNLLTIQDRNNFFLSLKKLDGAILWIPAFFFHTS  
ATVTRTLVDFFVEHRGQLKVQLAWPGNIMQHVNRWYKWKHLSPKRLSTGILMYTLASAICEE  
IHLYGFWPFQFDPNTREDLPYHYYDKKGTKFTTKWQESHQLPAEFQLLYRMHGEGLAKLTLS  
RCA

>Siltro\_GT29\_ST8Sia3

MVRVASVLGLVMLSVALLLILSLISYVSLKKENIFTTTPKYASAGGPRMYMFHAGFRSQFAMKF  
LDPSFVPIITNSLTQELQEKPAKWFNKTAYARQRREILQNVDVIRNFSLTKNSVRTGQLMHY  
DYSSHKYVFSISNNFRSLLPDTSPVMNKRYNVCAVIGNSGILTESQCGAEIDKADVFVFRCNF  
APTEGFQKDVGRKTNLTTFNPSILEKYNNLLTIQDRNNFFLSLKKLDGAILWIPAFFFHTS  
ASVTRTLVDFFVEHRDQLKVQLDWPGNIMQHVNRWYKWKHLSPKRLSTGILMYTLASSVCEE  
IHLYGFWPFQFDPNTGKDLPHYHYYDKKGTKFTTKWQESHQLPAEFKLLYKMHREGTLKLTLS  
QCA

>Takrub\_GT29\_ST8Sia3

MVRIASALGLVMFSVLLILSLISYVSIRKDFLLGSPRYGGPRMSMFHSGFRSQLAMKYLDP  
VFTPLTSSSEDLQNASKWSFNSSAFAQLKNEISQYIDVPRNFTLTRDSVRIGQLMHYDYSS  
HKYVFSIGENFRSLLPETSPILQKHYNVCAVVGNSGILTGSRGQQIDRFDFVFRCNFAPTE  
IFKKDVGRRTNMTTFNPSILEKYNNLLTVQDRNNFFLSLKKLDTTILWIPAFFFHTSATVT  
RTLVDFFVEHRGQLKVRRLAWPGNIMQYINNYWKTQKLSPKRLSTGILMYTLASSMCDQIHLY  
GFWPFQFDPNTGKELPHYHYYDKKGTKFTTKWQESHQLPTEFKLLYKMHREGLLKLSLSHCA

>Takrub\_GT29\_ST8Sia3-r

MVRVAKALGLVILCVAVLILSLISYVSLRKDSFFSSKYTTGGPRIMFHAGFRSQLAVNSLNP  
SFIPLTNALNEELHGKASKWKFNKTAFHQQRKDILGFIDIPNNFSLTKDRVRVQQLMHFDYS  
SHKYVFSISNNFKSLLPDTSPIHNKHYSLCSVVGNSGILTGSHCGANIDQADVFVFRCNFAPT  
EVYSKDVGRKTNMTTFNPSILERYNNLLTIQDRNNFFLNKLGAILWIPAFFLHTSATV  
TRTLVDFFVEHKGQLKVELAWPGNIMHDVNKYWKNKNSPKRVSTGIFMYTLASAMCDEIHL  
YGFWPFQFDPNTGKELPHYHYYDKKGTKFTTKWQETHQLPTEFKLLYKMHREGVIRLSLTHCT

>Tetnig\_GT29\_ST8Sia3

MVRIASVLGLVVMFSVLLILSLITYVSIRKDFVPGRYGGGPRMSLLHAGFRSQLAVNSLNP  
FIPLTSALSEDLQNSSKWSHNGSAFTQLKKEISQYIDIPRNFTLTRDSVRIGQLMHYDYSS  
KYVFSIGENFRSLLPEVSPIRQKHYNVCAVVGNSGILTGSRGQOEIDSLDFVFRCNFAPTEL  
FKKDVGRRTNMTTFNPSILEKYNNLLTVQDRNNFFLSLKRDPAILWIPAFFFHTSATVTR  
TLVDFFVEPRGQLKVQLAWPGNIMQYINNYWKTQKLSPKRLSTGILMYTLASSMCERIHLYG  
FWPFQFDPNTGRELPYHYYDKKGTKFTTKWQESHQLPTEFKLLYKMHREGVLKLSLSHCG

>Tetnig\_GT29\_ST8Sia3-r



MVRVAKALGLVILCVAVLILSLISYVSLRKDSFFSSKYTTGGPRIMFHAGFRS<sub>Q</sub>LAVNSLNP  
SFIPLTALNEELHGKASKWKFNKTA<sub>F</sub>HQQRKDILGFIDIPNNFSLTKDRVRVG<sub>Q</sub>LMHFDYS  
SHKYVFSISNNFKSLLPDTSP<sub>I</sub>HNKHYS<sub>L</sub>CSVVGNSGIL<sub>T</sub>GSHCGANID<sub>Q</sub>AD<sub>F</sub>V<sub>F</sub>RCNF<sub>A</sub>P<sub>T</sub>  
EVYSKDVGRKTNMTTFNPSILERYNNLLTIQDRNNFFLN<sub>L</sub>KKLGAILWIPAFFLHTSATV  
TRTLVDFFVEHKG<sub>Q</sub>LKVELAWPGNIMHDVNKYWKN<sub>N</sub>LSPKRVSTGIFMYTLASAMCDEIHL  
YGFWPF<sub>G</sub>WDPNTGKELPYHYD<sub>K</sub>KGTKFTTKWQETHQLPTEFKLLYKLHREGVIRLSLTHCT

>Danrer\_GT29\_ST8Sia3

MVRVSVLGLVMFSVALLILSLISYVSIKKDFIFTAPKYANAGGPRMYMFHAGFRS<sub>Q</sub>LAMKF  
LDP<sub>A</sub>FTSLNTALNENLQESSN<sub>W</sub>RFNRSAYAE<sub>L</sub>NKEIAQHIDVPHNFTLTKNSVRVG<sub>Q</sub>LMHYD  
YSSHKYVFSIGENLRSLLPDASV<sub>L</sub>NKRYNTCAVVGNSGIL<sub>T</sub>GSRGPEIDKYDFV<sub>F</sub>RCNF<sub>A</sub>  
PTEVFR<sub>R</sub>DVGRRTNL<sub>T</sub>TFNPSILEKYNNLLTIQDRNNFFLSLKKLDGAILWIPAFFHTSA  
TVTRTLVDFFVEHKG<sub>Q</sub>LKVQLAWPGNIMQYVNKYWKT<sub>Q</sub>LSPKRLSTGILMFTLASSLCEQV  
HLYGFWPF<sub>G</sub>WDPNTGKELPYHYD<sub>K</sub>KGTKFTTKWQESHQLPTEFKLLFKMHADGV<sub>L</sub>KL<sub>S</sub>LSH  
CA

>Anocar\_GT29\_ST8Sia3

MRSCKMVRVSVLGLV<sub>M</sub>LSVALLILSFISYVSLK<sub>D</sub>NI<sub>F</sub>TPKYANTGVPRMYMFHAGFRS<sub>Q</sub>  
FALKFLDPSFVPNTNSLNHELQDKSPK<sub>W</sub>IFNRTAFLQQRREILQHVDVIKNFSLTKNMVRIG  
QLMHYDYSSHKYVFSISNSFRMLLPDVSP<sub>I</sub>QNKHYNICAVVGNSGILVGSQCGQEIDKYDFV  
FRCNFAPTEAFHKDVGRKTNITTFNPSILEKYNNLLTIQDRNNFFLSLKKLDGAILWIPAF  
FFHTSATITR<sub>T</sub>LVDF<sub>F</sub>IEHRAQLKVQLAWPGNIMQHV<sub>N</sub>RYWKNKHLAPKRLSTGILMYTLAS  
AICDEIHL<sub>Y</sub>GFWPF<sub>G</sub>FNPNREDLPYHYFD<sub>K</sub>KGTKFTTKWQESHQLPAEFQQLFRMHSEGLA  
KLTL<sub>S</sub>HCA

>Orylat\_GT29\_ST8Sia3

MLRYTSTFGLIIFSVALLILSFISFVSIKKDVNPRYGPNGGPRMYMFHAGFRS<sub>Q</sub>VAMKYLDP  
AFTSLSSAINEDLKNSSKWTYNSTAFIQLRTEISHHIDMPHNFTLTRDAVKVG<sub>Q</sub>LMHFDYSS  
HKYVYSIGENFRSLLPEVSPILNRHYNVCAVVGNSGIL<sub>T</sub>GSLCGAQIEKYDFV<sub>F</sub>RCNFAPTE  
IFK<sub>D</sub>VGRRTNMTTFNPSILEKYNNLLTVQDRNNFFLSLKKLDGAILWIPAFFHTSATVT  
RTLVDFFVEHRG<sub>Q</sub>LKVQLAWPGNIMQYINNYWKT<sub>Q</sub>LSPKRLSTGILMYTLASSMCDQIHLY  
GFWPF<sub>G</sub>WDPNTGKELPYHYD<sub>R</sub>KGTKFTTKWQESHQLPAEFKLLHKMHTEGLLKLTL<sub>S</sub>HCA

>Orylat\_GT29\_ST8Sia3-r

MVRIAKALGLGILCAVVLILSLISYVSLRRDSL<sub>F</sub>SSVGGPRIMFHAGFRS<sub>Q</sub>SAMNFLDPSFI  
PLTTALNEELQ<sub>G</sub>KPYKWKFNRTAFYQQRKDIFSYIDIPNNFSLTKNSVRVG<sub>Q</sub>LMHFDYSSHK  
YVFSISNNFKSLLPEISPILNKHYSVCAVVGNSGIL<sub>T</sub>GSHCGPEID<sub>Q</sub>AD<sub>F</sub>V<sub>F</sub>RCNFAP<sub>T</sub>DVY  
SKDVGRKTNMTTFNPSILERYNNLLTIQDRNNFFLHLKKLEGAILWIPAFFLHTSATVTRT  
LVDFFFVEHKG<sub>Q</sub>LKVELAWPGNIMHNVN<sub>K</sub>YWKT<sub>N</sub>LSPKRLSTGILMYTLAFSMCDEIHL<sub>Y</sub>GF  
WPF<sub>G</sub>WDPNTGKDL<sub>P</sub>YHYD<sub>K</sub>KGTKFTTKWQETHQLPSEFKLLYKLHREGVTKLGL<sub>S</sub>HCT

>Gasacu\_GT29\_ST8Sia3

MVRIVSALGLVMFSVALLILSLISYVSIKKDFLLSTPRYGANGGPRMSMLHAGFRSQLALKY  
LDPAFSPLTNALGEDLQNSSKWTYNSSAFLQKNEISQYIDIPHNFTLTRDSVRIGQLMHYD  
YSGHKYVFSIGENFRSLLPEVSPILNKHYNVCAVVGNSGILTGSRCPQIEKFDFVFRCNFA  
PTEIFKKDVGRRTNM TTFNPSILEKYNNLLTVQDRNNFFLSLKKLDGVILWIPAFFHTSA  
TVTRTLVDFFVEHRGQLKVRRLAWPGNIMQYVNSYWKTKQLSPKRLSTGILMYTLASTMCDQI  
HLYGFWPFGWDPNTGKELPYHYD KKGTKFTTKWQESHQLPAEFKLLYKMHTQGLLKL SLSH  
CA

>Gasacu\_GT29\_ST8Sia3-r

MVRIAKALGLVILCVAVLILSLISYVSLRKDSLFGSSKYYMGGPRIMFHAGFRSQFAMNFLD  
PSFIPLTNALNEELQGKPSKWKFNKTAHFLQKKDIFSYIDIP TNFSLTKNSVRVGQLMHFDY  
SSHKYVFSISNNLKSLLPDASPIRNKHYSVCAVVGNSGILTGSHCGPEIDQADFVFRCNFAP  
TEVYSKDVGKKTNL TTFNPSILERYNNLLTIQDRNNFFLNK KLEGAILWIPAFFLHTSAT  
VTRTLVDFFVEHKGQLKVELAWPGNIMHDVNKYWKTKNLSPKRLSTGILMYTLASAMCDEIH  
LYGFWPFGWDPNTGNDLPYHYD KKGTKFTTKWQETHQLPSEFKLLYKLHRDGVIKLSLTHC  
S

>Homsap\_GT29\_ST8Sia5

MRYADPSPNRDLLGSRTLLFIFICAFALVTLLQQIILYGRNYIKRYFEFYEGPF EYNSTRCLE  
LRHEILEVKVLSMVKQSE LFD RWKSLQMCKWAMNISEANQFKSTLSRCCNAPAF LFTTQKNT  
PLGTKLKYEVDTSGIYHINQEIFRMFPKDMPYRSQFKKCAVVGNGGILKNSRCGREINSAD  
FVFRCNLPPISEKYTMDVGVKTDVVTVNPSI ITERFHKLEKRRPFFYRVLQVYENASVLLPA  
FYNTRNTDVSIRVKYVLDDFESPQAVYYFHPQYLVNVSRYWLSLGVR AKRISTGLILVTAAL  
ELCEEVHLFGFWAFPMNPSGLYITHHYD NDKPRPGGHAMPSEIFN FLHLHSR GILRVHTGT  
CSCC

>Pantro\_GT29\_ST8Sia5

MRYADPSANRDLLGNRTLLFIFICAFALVTLLQQIILYGRNYIKRYFEFYEGPF EYNSTRCLE  
LRHEILEVKVLSMVKQSE LFD RWKSLQMCKWAMNISEANQFKSTLSRCCNAPAF LFTTQKNT  
PLGTKLKYEVDTSGIYHINQEIFRMFPKDMPYRSQFKKCAVVGNGGILKNSRCGREINSAD  
FVFRCNLPPISEKYTMDVGVKTDVVTVNPSI ITERFHKLEKRRPFFYRVLQVYENASVLLPA  
FYNTRNTDVSIRVKYVLDDFESPQAVYYFHPQYLVNVSRYWLSLGVR AKRISTGLILVTAAL  
ELCEEVHLFGFWAFPMNPSGLYITHHYD NDKPRPGFHAMPSEIFN FLHLHSR GILRVHTGT  
CSCC

>Musmus\_GT29\_ST8Sia5

MRYADPSANRDLLGNRTLLFIFICAFALVTLLQQIILYSKSYIKRYFEFYKEPLEFNSTRCLE  
LRQEILEVKVLSMVKQSE LFERWKS LQICKWAMGASEASL FKSTLSRCCNAPN FLFTTQKNT  
PVETNLRYEVESSGLYHIDQEIFKMFPKEMPYRSQFKKCAVVGNGGILKNSGCGKEINSAD  
FVFRCNLPPISGIYTTDVGEKTDVVTVNPSI I IDRFHKLEKRRPFFSVLQRYENASVLLPA  
FYNVRNTLV SFRVKYMLDDFQSRQP VYFFHPQYLSSVSRYWLSLGVRARRISTGLSLVTAAL  
ELCEEVHLFGFWAFPMNPSGFFITHHYD NDKPKPGFHAMPSEIFTF LRMHSR GILRVHTGT  
CNCC

>Macmul\_GT29\_ST8Sia5

MRYADPSANRDLLGNRTLLFIFICAFALVTLLQQILYGRNYIKRYFEFYEGPFEYNSTRCLE  
LRHEILEVKVLSMVKQSELFDRWKS LQMCKWAMNISEANQFKSTLSRCCNAPAFLETTQKNT  
PLGTKLKYEVDTSGIYHINQEIFRMFPKDMPYYSQFKKCAVVGNGGILKNSRCGREINSAD  
FVFRCNLPPISEKYTMDVGVKTDVVTVNPSIIITERFHKLEKWRPFFYRVLQVYENASVLLPA  
FYNTRNTDVSIRVKYVLDDFESPQAVYYFHPQYLVNVSRYWLSLGVRAKRISTGLILATAAL  
ELCEEVHLFGFWAFPMNPSGLYITHHYDNDVKPRPGFHAMPSEIFNFLHLHSRGILRVHTGT  
CSCC

>Ratnor\_GT29\_ST8Sia5

MRYADPSANRDLLGNRTLLFIFICAFALVTLLQQILYSKSYIKRYFEFYKEPLEFNSTRCLE  
LRQEILEVKVLSMVKQSELFERWKS LQICKWAMDASEASLFKSTLSRCCNAPNFLETTQKNT  
PVETNLRYEVESSGLYHIDQEIFKMFPEMPYYSQFKKCAVVGNGGILKNSGCGKEINSAD  
FVFRCNLPPIISGIYTTDVGEKTDVVTVNPSIIIDRFHKLEKWRPFFSVLQRYENASVLLPA  
FYNVRNTLVSFRVKYMLDDFQSGEPVYFFHPHYLSVSRYWLSLGVRARRISTGLILVTAAL  
ELCEEVHLFGFWAFPMNPSGFFITHHYDNDVKPKPGFHAMPSEIFTFMRMHSRGILRVHTGT  
CNCC

>Bostau\_GT29\_ST8Sia5

MHYADPSANRDLLGNRTLLFIFICAFALVTLLQQILYGRNYIKRYFEFYEGPFEYNSTRCLE  
LRHEILEVKVLSMVKQSELFDRWKS LQMCKWAMNISEANQFKSTLYRCCNAPPFLETTQKNT  
PLGTKLKYEVDTSGIYHINQEIFRMFPKDMPYYSQFKKCAVVGNGGILKNSRCGREINSAD  
FVFRCNLPPISEKYTMDVGVKTDVVTVNPSIIITERFHKLEKWRPFFYRVLQLYENASVLLPA  
FYNTRNTDVSIRVKYVLDDFESPQAVYYFHPQYLVNVSRYWLSLGVRAKRISTGLILATAAL  
ELCEEVHLFGFWAFPMNPSGLYITHHYDNDVKPRPGFHAMPSEIFNFLHLHSRGILRVHTGT  
CSCC

>Galgal\_GT29\_ST8Sia5

MGYTDPSSGRDLLGNRTLFFIFICAFVVTLLQQILYGRNYLKRYFEFYEGPFEYNSTRCLE  
LRHEILEVKVLSMVKQTELFDRWKS LQMCKWEMNVTEANILKSTLSRCCNAPAFLETTQKNT  
PLGTKLKYEVDTSGIFHINQEIFKMFPEMPYHRSQFKKCAVVGNGGILKNSRCGREIDSAD  
FVFRCNLPPISEKYLTVDVGVKTDVVTVNPSIIITERFHKLEKWRKPFYDVLQVYENASVLLPA  
FYNTRNTDVSIRVKYVLDDFESQQAVYYFHPQYLINVSRYWLGQGVRAKRISTGLILVTAAL  
ELCEEVHLFGFWAFPMNPSGIFITHHYDNDVKPRPGFHAMPSEIFNFLHMHSKGILRVHTGT  
CGCC

>Siltro\_GT29\_ST8Sia5

MGYADPSGGRDLLGNRTLLFIFICAFALVTLLQQILYGRNYIKRYFEFYEGPLDFNSTKCLE  
LRRDITNVKVLMSVKESDLFDRWKS LQVCKWEMNVTEANAFKSALTRCCNAPSFLLETTQKNT  
PLGTKLRYEVDTSGIFPISSEIFNIFPKQDMPYYSQFKKCAVVGNGGILKDSKCGKDIDST  
DFVFRCNLPPIITPKYVEDVGMKTDVVTINPSIIITERFNKLEKWRPFFYEV LQGYENASLLLP  
AFYNTRNTDVSIRVKYVLDDFESQQAVYYFHPQYLINVSRFWLMQGVHAKRISSGLILVTAA

LELCEEVHLYGFWGFPMPSGNFITHHYDENVKPRPGFHAMPSEIFNFIHMHSGILRVHTG  
TC

>Takrub\_GT29\_ST8Sia5

MLRRKKAYADTSSGKDILGNRSLCFIFICAFGLVTLIQQILSGKNYIKRYLGNYDGPFEYNS  
TTCRELRQEIMDVKVLTMVKTSDLFERWRNLQICRWEQNKEETSNEFKMSLSRCCNAPSFLFT  
TKRNTPAGTKLRYEVDTSGLILPITAEVFKMFPDDMPYSKSQFKKCAVVGNGGIKNSKCGKE  
IDSADFVFRNCNIPPISEKYSADVGTKTDLVSNPSIITERFQKLEKWRPFFYEVLQNYENSS  
AVLPAFYNTRNTDVSFRVKYMLDDFDSQRGVFFFHPQYLLNVQRFWAVQGVRAKRLSSGLML  
VTAALEMCEEVHLYGFWAFPMNPSGIFITHHYDENVKPRPGFHAMPHEIFNFIHMHTRGIVN  
VHTGQCT

>Tetnig\_GT29\_ST8Sia5

MLRRKKTYPDTSSGKDILGNRSLCFMFICAFGLVTLIQQILYGKNYIKRYLGSYDGSLEFNS  
TTCRELKQEIMDVKVLTMVKTSDLFERWRNLQVCKWEQNKEETSNEFKMSLSRCCNAPSFLFT  
TRRNTPAGTKLRYEVDTSGLILPITAEIFKMFPDDMPYAKSQFKKCAVVGNGGIKNSKCGTE  
IDSADFVFRNCNIPPISEKYSADVGTKTDLVSNPSIITERFQKLEKWRPFFYEVLQNYENSS  
VVLPAFYNTRNTDVSFRVKYMLDDFDSQRGVFFFHPQYLLNVQRFWAVQGVRAKRLSSGLML  
VTAALEMCEEVHLYGFWAFPMNPSGIFITHHYDENVKPRPGFHAMPHEIFNFIHMHTRGIVN  
VHTGRCV

>Gasacu\_GT29\_ST8Sia5

MLRRRMGYADPSSGKDILGNRSLCFMFLCAFGVTLTLLQQIILYGKNYIKRYLENYDGSYFYNS  
TACRELKQEIMDVKVLTMVKTSDLFERWRNLQVCRWEQNKEETSNEFKMSLTRCCNAPSFLFT  
TKKNTPAGTKLRYEVDTSGLILPITTEVFKMFPDDMPYSKSQYKCAVVGNGGIKSTKCGKE  
IDSADFVFRCNLPPLDNGYENDVGIKTDLVTANPSILVCRFQKLEKWRPFFYEVLQKYENSS  
VVLPAFYNTRNTDVSFRVKYMLDDFDSQRGVFFFHPQYLLNVQRFWAVQGVRAKRVSSGLML  
VTAALEMCEEVHLYGFWAFPMNPSGIYITHHYDENVKPRPGFHAMPHEIFNFIHMHTRGIVN  
VHTGQCT

>Danrer\_GT29\_ST8Sia5

MGYSDPTASRDLLGNRSLCFIFICAFGLVTLTLLQQIILYGKNYIKRYLERIDGSLQFNSSSCKE  
LRQDITDVKVLTMVKTSSELFERWRNLQVCKWDQNKETDNFKMSLSRCCNAPSFLFTTKRNT  
PSGTKLRYEVDTSGLILHISPEIFKMFPDDMPFSKSQFKKCAVIGNGGIKNSKCGREIDASD  
FVFRNCNIPVSDLYSQDVGSKTDLVTINPSIITERFQKLEKWRKPFYEVLQNYENSSVVLPA  
FYNTRNTDVSFRVKYMLDDFESSRGVFFFHPQYLLNVQRFWAVQGVRAKRLSSGLMLVTAAM  
ELCEEVHLYGFWAFPMNPSGIFITHHYDENVKPRPGFHAMPYEIFNFMHMHARGIVHVHTG  
CR

>Anocar\_GT29\_ST8Sia5

MGYTDPTSSRDLLGNRALLFIFVCAFAVVTLVQQIILYGRNYLRRYFDYEGPLEFNSSKCLE  
LRKGITDVKVLMSVKQTELFERWKNLQMCCKWEMNITQANIFKATLLRCCNAPAFLETTQKNT  
PLGTKLKYEVDTSGIFHVNQETFRMFPQEMPYSRSQFKKCAVVGNGGILKNSRCGREIDSAD

FVFRCNLPPISEKYIADVGVKTDIVTVNPSIITERFHKLEKWRKPFNVLQTYENASVLLPA  
FYNTRNTDVSIRVRYALDDFESQQSVYFFHPQYLINLSRYWLNQGVRAKRISTGLILVTAAL  
ELCEEVHLFGFWAFPMNPSGIYITHHYDENVKPRPGFHAMPSEIFNFLMHMSKGLRVHTDA  
CNCC

>Calmil\_GT29\_ST8Sia5

MGYSERSGKDILGNRSLFFIFISAFAIIVTLLQHILNGKNYIKRYFELTEGSYDYNSSSTCREL  
RNDITEVKVLSMVKQSELFERWRTLQCKWELNKTEANTARLTNCCNAIQNFTVTQVNTALG  
ANLTYDAQPKKQITITEDIENLLPQEMPYSRSQFKKCAVVGNGGILKKSECGKEINSADFV  
SCNLPPLSNEYARDVGHRTQLVTANPSIIKKRFQKLDKWRPFFVELLQVYENTSVVMPAFYN  
TRNTDVSLRVRYALDDFSAPQDLFYFHPRYLENVARFWGRQGVRAKRPSGLMLVTAAMELC  
QEVHLYGFWGFPMDPSGIHITHHYDENVKPRPGFHSMNPNEIFTFNHMHSRGLVQVHTTPCR

>Orylat\_GT29\_ST8Sia5

MRRRMGYSDPSSGKDILGSRSLCFMFICAFGLVTLQIILYKKNYIKRYLETYDRSLEFNST  
TCRELRQEIMDVKVLTMVKTSDFERWRNLQVCKWEQSKEETSNEFKLSLRCCNAPSFLFTT  
KRNTPAGSKLRYEVDTSGLPITNEVFKMFPHDMPYSKSQFKKCAVIGNGGIKNSKCGKEI  
DSADFVFRCNIPPIKEKYSTDVGSKTDLVTINPSIITERFQKLEKWRPFFYDVLQNYENSSV  
VLPAYNTRNTDVSFRVKYMLDDFDSQRSVFFHHPQYLLNVQRFWAVQGVRAKRLSSGLMLV  
TAALEICEEVHLYGFWAFPMNPSGVYITHHYDENVKPRPGFHAMPHEIFNFIMHTRGIINV  
HTDQCM

>Danrer\_GT29\_ST8Sia7-A

MALTSLRWGSTFLVLIIFQCVCVMFYKQNTPSFGDVMTDTFQKMGCAKLRHKFSVIKPAKS  
IKFKSFAREVSDFLSCPYKSNETEQLNRIRLRFCNATESFVLTKRNTAISQSIPYETNSR  
RTYKMNADVHKLLEPESPWSAGALGLCAVVGSSGILKNSSCGRQIDSADYVIRFNLALINDS  
DVGLKTNLITINPSQIRGYRNLEKKPGPLVKRVSVYGNSSLIIPAFAYVICTSPSLRVLRVL  
QPIRPQQPVLFFSPHYLRALDRFWKGRGLKERRLSTGFMLISAALEMCEHVHVYGFWPFPGTD  
LQENPIPYHYYDQMRSGSVHRMPEEFLRLLQLHSQGALTLHLQPCDTH

>Danrer\_GT29\_ST8Sia7-B

MALVQWVFRLLVVLIVSQSVCVMFFYTLDTHSHGCRMRLQYCCNATHSLIILTKRNTAVDHI  
TYETEGKRTYRVKADLHKMLPEDSPWSAGALGLCAVVGSSGILKNSSCGRQIDSADFVIRFN  
LALVNDSDVGLKTDLMNINPSQIRRYKTMEQDPGPLVERISVYGNSSLIIPAFAYGFCTSPS  
LRVLRVLQPIRPQQPVVFFFNPHYLRALDRFWKWRGLKEPRLSSGFILISAALEMCEHVHVY  
FWPFGTDLQENPVYHYYDQSKPSPYMHRMPEEFLRLLQLHSQGALTLHLQPCHTHRAVFPN  
PVPLGTPTVLIIGCLPYLRHPGFSSKS

>Anocar\_GT29\_ST8Sia7-A

TQLQQCCNASFRFVTTKENIRLGSYIIFDGNPTRKLRVDTKLLDLLPEKSPFMDTSYRKCAV  
VNGGILLNSSCGQEIDRADLVIRFNLPPMNFSEDIGTKTSLVTINPSILQNRFKLLQERRK  
PFVEALHSYSDATFLLPVLSFVGHNILGYRVLYTLEDFGVEQQAFFLNPQYLSNLANFWKKR

GLKTNRLSSGFMLVSMALFQCQHITLYGFWPFSDYDLNNQSI PHHYDNNMPTPGVHAMPTEF  
SYLMSYAEGVLRRLRVGKCQ

>Oncmyk\_GT29\_ST8Sia7

MCYLVLFFILLCSGTLISITLIDYYQHQRDGFLLDSVQKGLQCRRLRKRLVTMSTIKKVDIALF  
SQDVRELMDCPWRLNLTHRELYRTELWSCCNASDRLMVTRQNTNLNQSLSYEIHRRWKKRKVD  
QALWEMPLPQTVPWKGLSRCAVVGSGGILQNSSCGAEIDNADYVIRFNLAPINKSCDVGVK  
TDLVTANPSQIIKGYTDLQONPGHLAEVLSFYGHALLLPAFSSASGTAPCFKVYHALRKAR  
PQQEVVFFHPDYLFELGRFWRHRGQRARRLSTGLMLASTALEICEQVHLYGFWPFPLDLSHN  
SLPHHYDNDVGNPKMHAMPEEFLLLLQLHSQGALQLHVGPCTLTPTP

>Esoluc\_GT29\_ST8Sia7

MRCWSAATRFCLLFVFLFVLSSTIMNDYQFPRDGFMEVSVQKSLRRCRKLRLVAMTTMKKV  
DIVPFSQVRELMDCPWRLNLTHRELHRTTELWACCNASDRLIVTRQNTLVNQTLTYEAERWR  
KKLVDQTLWEMFPKNVPWSKGLLGRCAVVGSGGILQNSSCGEEDRAHYIIRFNLAPVNQSR  
DVGLKTDLITANPSQIIKQYPLHKNPGRLAEQMSVYGNARLLLPAFSFAFGTAPCFKVYHA  
LQKALPQQEVVFFHPDYLFELGQFWRRRGQKASRISTGLMLASSALEICDQVHLYGFWPFV  
DLSHNPLQHYYFDVGNPHYMHAMPEEFLLLLQLHSQGALQLHVGHCR

>Colliv\_GT29\_ST8Sia7

MFMAFSKMPNNIIQKEYVRQGLLKMHLWLTLLPVAASLVYMYFLVLNDRPDIEVPEAEAC  
QRLLSNLTQPQKAELGRCCNASAWLAVTQDNTPLGSEIVYDAYPSKRLKVSSGLLEILPEKS  
PFQESPYKTCVAVGNGGILRNSSCGSKIDGHEFVIRFNLPSVDFPEDVGGKSSIVTVNPSIL  
HKRFHGLNGRRLPFVKAASYGKTWFLIPAFSYPNSSEASYRALYALQDSASQSHIFFHPQ  
YLSSLSKYWHDHGFHTPRLSSGFMLVNAALELCQHITLYGFWPFSLHPDGHSLPHHYDNLV  
PNSRIHIMPKEFTYYVDMHFHGVLLHLGR

>Latcha\_GT29\_ST8Sia7

MSEENRKRCGELRENLTSQLPKETDLNKCSNLTQRLVLTRENAPIGHEIEYEVAEQRVVVE  
EPLFKLLPRFPFFYQESPFKKAPYKRCVAVGNAGILLNSGCGRRIDQADVFVRCNLPPLNY  
SKDVGSKTDLVTANPSIIQKYHGLKESRRLFVERMKVYKDALIILMAAFSOSFATEISLAVA  
YALEDFGSKQKAIFFHPAYLRQLGSLWRSWGVRRARRLSSGLMLVSAALELCDSVALYGFWPF  
STGLDGEAVLHHYDNDVPEPVGHAMSSSEFVHYLQMHSGVLQLHVGKC

>Chrpicbel\_GT29\_ST8Sia7

MLRRQSWALVLAVGITLSFSLSVLWRLQSPEATGMDAEQCRELGQELSQRVLPVRLHEAWIW  
RRLKLMQSCPWAYNARALGRYREQLGHCCNASADLVLTTRDNTPLGSRIVCDGQPAKLLVQE  
ALLEILPQGAPYDSCAVVGNNGILHNSGCGPEIDRAQFVIRFNLPPMGFAEDVGTSSVITV  
NPSILVLRFGALSRRRPFAMGTYGAPLLLI PAFSFI SFAAVSSQALYTLDFGSPARAV  
FMNPEYLAGLDGHWHRRLRAKRLSSGFMLVNAALELCQHITLYGFWPFPTDPEGRPLPYHY  
YDKQTPKPGVHAMPDEFTRYLGMHLQALRLHLGRQEGLAGGHAQQGSDGG

>Lepocu\_GT29\_ST8Sia7

MALRCLQLQREVLGMQSLKKVNSTLLCGQVTQLMRCPWTLNLTQLEQQRTELRLSCNATGRL  
VVTQDNTPLGGTITYDAEKWTRQVDTEIFNMLPQSPPWAGGPGARLRRCAVVGNGGILRNSS  
CGAHIDRADFVIRFNLPLNYSRDVGVKSSLVTVNPSQIINSYRNLNYPARRPFVQRVSTYEN  
AHLVLPFAFAFSFCTDPCFRVYYTLQDNRPHQALFYHPDYLRQLATYWQEKGLRETRLSTGL  
MMVSAALELCDRVELYGFWPFSSFDLSEPLSNHYDDVPPNRMHAMPEEFLRLLRMHSQGV  
LRLRVGQCP

>Deiacu\_GT29\_ST8Sia7

MKPLRRPHAPDLVFDMSALDSSLQVIILLPAPLNGVLLKKSSKWTPTSANLFCSRALDCCV  
CGFHLGFSLSCFSFEDSKTWCVLRCATGERTAGIHPPFDGVKVKIITVDSKLTNMLLERFPL  
ADAQYSKCALIGNGGILQDSRCGQEIDQADFIIRFNLPLNRTEVDGKTKHLVTINPSILTN  
RFKSLVRSVAFIDAVRAYPNALFLIPALSFDHIELGYRALHILKDIGLPHQAFFLNPHYL  
GALDITYWKQKGMTEIRLSTGFMFTSFALEFCDHITLYGFWPFDFDLTGKPINHHYYDNVLP  
PFVHSMSEEFSTRYIDMYAQQVLRILQLGKC

>Pytmol\_GT29\_ST8Sia7

MKPLRRPHAPDLVFDMSALDSSLQVIILLPAPLNGVLLKKSSKWTPTSANLFCSRALDCCV  
CGFHLGFSLSCFSFEDSKTWCVLRCATGERTAGIHPPFDGVKVKIITVDSKLTNMLLERSPL  
AGFYQNKCALIGNGGILRHSSCGQEIDQADLIIRFNLPPMNYTEDVGTKTSVLTINPSILNN  
KFQSLQGPQKPFDAQAYRDALFLIPSLSFSSHVLCRAVSIMKDSGLTHRAFFLHPPHYL  
GAIRKYWEQKGLKEIRLSTGFLFISIALEFCEHITLYGFWPFSDYDLTGEPLSHHYDNILPN  
AGFHTMSEEFLLHYLNMYAQQVLRILQLGKC

>Strcamaus\_GT29\_ST8Sia7

MPNNISTEEYVNPGLLKVRKLWTGLLTMAAVSVVSMFFLVWSDGRPDIRVPEPEACQVLSSS  
LTESFLKRVDEVWLSHLKLMQSCRWNFNASALAQYRAELGHCCNASAWLALTQVNTPLGSN  
IVYDGYRSKSLKVSSGLLEILPEESPFQEPFYKTCVVNGGILRNSSCGSEIDEHQFVIRF  
NLPSMDFPEDVGRKSSIVTVNPSILQKRFHGLNGRRLPFVKAAPYGETWFLIPAFSYPGQN  
EASRALYALQDSGSRSPIFFFHPPQYLSALTRYWHEHGFHPTRLSSGFMLVNAALELCQHIT  
LYGFWPFSLHPDGHLPHHYDNQLPNPRMHLMPQEFACYVMHFQGVLLQHLVHGKC

>Apavit\_GT29\_ST8Sia7

MPHSISRREYVKPGLLKMHKLWVMLLAVAAVSFVSMCFLVLNRPDIKVSEAEACQELLSNI  
TQPHKAELGHCCNASAWLAVTQENAPLGSEIVYDGYPSKRLKVSSGLLEILPEKSPFQNP  
KTCVVNGGILRNSSCGAKIDEHQFVIRFNLPSMDFPEDVGRKSSIVTVNPSILQKRFHGL  
NGRRLPFVKAAPYKGTWFLIPSFSPDDTEASYRALYALQDSASESHVFFFHPPHYLSALS  
YWHDLGFHTYRLSSGFMLVNAALELCQHITLYGFWPFSSFHDPGHSLPHHYDNVLPKQNIHI  
MPKEFSYYVDMHFHGVLLQHLHGRC

>Gekjap\_GT29\_ST8Sia7

MYHHLRLAKRDFMLVVSVVFLVSLTSLMQRTTRSVLLHMTAREEELVRAVEKLPQKLDEE  
ILAHLLLTQGCPWQASARAMAQYRTELGRCCNASFWLAIKENTPLGSDILLDGNKGKLPV  
GAELMDLLPERSPIPGILYDQCAVVNGGILQNSSCGQEIDQADLIIRFNLPPMNYSEDVGT

KTSLVTINPSILQTKFNKLEAHRKPFADALRPYRSALVFI PAFS FVGHSELAYRALYTMEDF  
GTGQRAYFWNPHYLDTLGIYWKARGFYPHRLSSGFMLVNMALFCKRITLYGFWPF SHDPAG  
RPIPHHYDNTWPKPGVHAMSQEF SHYLHMYAQGV LQLRLGSCQ

>Promuc\_GT29\_ST8Sia7

MDEVLRWQLMLIQECPWKPNATAVMQHRAELGQCCNASHRLVVTKENAPLGSTIHF DGVKVK  
IITVDSKLTNMLLERFPLADAQYSKCALIGNGGILQDSRCGQEIDQADFIIRFNLPPLNRTE  
DVGTKTHLVTINPSVLTNRFKNLVGP PMAFIDAVRAYPNALFLIPALSFHDHIELGYRALHI  
LKDIGLPHQAFFLNPHYLGALDMYWKQKGMTEIRLSTGFMTSFALEFCDHITLYGFWPF LF  
DLTGKPI SHHYDNLVLPNAFVHSMSEEF SRYIDMYAQGV LR IQLGKCQ

>Ambmex\_GT29\_ST8Sia7

MRLKGRPVNHLALMVVSC TTFILLYTFSVPADREQEELVCKRSPEVTITHSKAKCQKLRRIF  
ATLSAHHKIGEKSIMRNAEELQRCPWQENREKKEFYRSEINQCCNSSHGLIVTQENTRVGEN  
IVYETQKSVKINVTTEIFNMFPKESPFSGKAYKTCAVVGNGAILVDSCCGQQIDQAEFVFRF  
NLPPLNYTKDSGKKVDLVTANPSIMINRFQSLNHRRAKAVDMLRAYRGALILMPTFSHTFGT  
QLAFKVQYTLDDFGLGSRMLS FHPVYLENLAKYWRKGLYVKRLSSGIMLVSAAMELCDSIT  
LYGFWPFYSNLEGRITIGYHYDKMAPNIQVHAMPKEFLIYSQMHAQGALKLQVGQCS

>Rancat\_GT29\_ST8Sia7

HHRVWKHGANVSTSECSHLRSLILNSVLRIFKQQAFFKVVKTLQGC PWKEDQTERNLLQANL  
GKCCNASYSMIMTQENTVIGQTITFDAETKIKQ NITKSLYSLFPKKS PFQKPIRTC AVVGNG  
GILTNSSCGAQIDGADFVRLNFPPLNWTDDIGAKTDLVTSNPSILMNKFS SLTEKRKPFIM  
MVQEYSSPLILLPAFSYSANTEVSLRVLYTIEDFELNSKV VFFNPEYLKNLSAYWKS MGLKF  
GRLSSGLMVVSIAMEVCDKVTLFGFWPFSKDLNGVPILHHYDNP PPKPGIHAMPDEFYKYL  
QMHIQGS LRLNLEHC

>Malterter\_GT29\_ST8Sia7

MVAPPRMLRRQSWALVLA VGIALSFSLSVLWRLQS QASQPKTALAAGKGARLDPKHPCRTMD  
QNRSPIPEALVMGAEQCRGLMQNWSAGTLPAREQLGSSCNASANLVLTQNN TQLGSQIVYDA  
QRDKKHPVKEELLEMLPQGS PFQGAPYECCA VVGNGGILRNSSCGSEIDRAQFVIRFNLP PM  
DFADDVGTKSSVVTMNP SILHARFRGLSRWRRPFAEAVGIYGAP LLLIPAFS FVGQSTV SFQ  
ALYTLEDFGSPARAVFMNPEYLARLDGHW RPRGLRAKRLSSGFMLVSAALELCQH LTLYGFW  
PFPTDPEGRLLP HHYDNQPPKPGIHAMPDEFTRYLGMHMQGALRLHLGR CQ

>Sinrhi\_GT29\_ST8Sia7

MALAFLRWIFRILMVLIVFQGVFVMFY YTPGTHSSRDGMTDTLQLLRCAKLRHKFSI IKPAK  
SLNLESFTQELSDFMSCPYKSNTTERELNRMK LQFCCNATRSLFLTKRNTAVNQTIPYETST  
ISTYTMNDTLHSMLPEDFPW SGRRLGRCAVVGSGGILKNSSCGREIDSAD FVIRFNLASIND  
SDVGLKTDLVTINPSQIQREYKDLEKKPNPLVKRVSVYGNASLIMPAFAYTFCTGLSIRTLK  
ALHPIRPQQPVVFFSPYYLQTLDRFWKGRGLK SIRLSTGFMLISAALEVCEHVHVYGFWPF D  
TDLQDNVPYHYD LRRPSKRMHKMPEEFV RLLQLHSQGALTLHLQPCSSDAS



>Sinans\_GT29\_ST8Sia7

MALAFRLWIFRLLTLLVSHSVCVIFYYTADTHSSREAMPDTLQRLRCAKLRKFSVITSVK  
RLNMESFTEELVDFLKCQKPNTEQELNRMKLQFCCNATGSIFLTKRNTAINQTI PYETDT  
KHTYRMNAAIHMLPEDFPWSGRRLGRCVVVGGILKNSSCGREIDSADVFIRFNLASIND  
SDVGLKTDLVTINPSQIQREYKDLEKKNPLVKRVSVYGNSTLIMPAFAYTFCTGLSIKTLK  
ALHPIRPQQPVVFFSPYYLQTLDFWKGRGLKSIRLSTGFMLISTALELCENVHVGFWPFD  
TDLQDNLVPHYHYDLRRPSKSMHKMPEEFVRLQLHSQGALTLHLQPCSSDAS

>Gymprzprz\_GT29\_ST8Sia7

MALVFLRWIFQLLTVLIVFQGVCMFYTRSDTHSSRDGMTETLQLLRCAKLRHKFSIIKPA  
QSIKLESFTQELSDFMNCPHKPNTTERELNRMRMQFCCNATGSLFLTKRNTAINQTI PYETS  
TIRTYNMNPVIHSMPLPEDFPWTGRRLGRCVVVGGILKNSSCGREIDSADVFIRFNLAYIN  
DSDVGLKTDLVTINPSQIRYKNLEQNPDPVERVSVYGNASLAMAFAFAYTFCTGLSIKTLKV  
LHPIRPQQPVVFFSPIYLRTLDRFWKGRGLKSIRLSSGFMLINTALELCEHVHVGFWPFGT  
DLQNNVPHYHYDELSPHRYKHKMP

>Catcat\_GT29\_ST8Sia7

MALAFRLRVFRLMLVLMVFQGVCMIIYYTRNTHSPRDGTADRLQKLRCTKLRHKFAIIKPAK  
SIQLQRFTQELSDFMSCPYKSNTERELNRMRLQYFCNATGSLFLTKRNTAINQTI PYETST  
VKTYKMNAAIHGMLPEDFPWSGRRMGRCAVVVGGILKNSSCGREIDSADVFIRFNLASIND  
SDVGLKTDLITINPSQIQFKNLDKNPEPLVERVSVYGNASLIMPAFAYTFCTGQSIKTLRVL  
HPIRPQQPVVFFSPTYLRTLDRFWKGRGLKEVRLSTGFMLISTALELCEVDHVHVGFWPFGTD  
LHNSVPHYHYDQLSPHYMHAMPEEFVRLQLHSGALTLHLQPCS

>Pimpro\_GT29\_ST8Sia7

MASASLQWIFTLMMVLVIFQGVCMFYTADTHSSRDAITKGFLRLHCEKLRKFSIIKSAK  
SINFKRFTQELSDYLSCPYKSNQTERELNRIRLQFCCNATGSFILTKRNTAITQSIQYETST  
KTYKMAELHKMLPEDI PWSGRRLGRCVVVGGILKNSSCGREIDNADVFIRFNLAENVDS  
DVGLKTDLITINPSQIRYKNLQNNPDPLVERVSVYGNASLIIPAFAYTFCTSVSIKVLKVLQ  
PIRPHQPVVFFSPSYLRS�DRFWKGRGLQEERLSTGFMLISTALELCEHVHVGFWPFDNDL  
QDQPIPHYHYDLSRPSHRHKMPEEFVRLQLHSQGALTLHLLPCDSPETDRENNL

>Salsal\_GT29\_ST8Sia7

MRYSIYLVLFILVCSASLLSVTLISRYYHKRSGGFDSYAAFRCNRLRLKFLTLTSAKAINMR  
TLIMDVRQLMTCTHRPNITQRELYRVILRSCCNATGEMILTKQNTKLGQKIHYETNQLFKT  
VDKKLHSMPLPKDLPWSKGLLSHCAVVVGGILQNSSCGAEIDSADYIIRFNLGPVTNSKDVG  
NKTHLMTINPSQIRGYRNLTAPQPLANRVAVYGNASLLLPAFSYQFSTGLSLDVYHALQPL  
RPYQKVVFNPNFMLNLGRKWKGOGLKEPRLSTGLMLASVAMELCEEVHIYGFWPFSLDLNH  
NPLPHHYDNDVGPKIGFHSMPPEEFQLLLKLHTQALQLHLGRC

>Salsal\_GT29\_ST8Sia7-B

RDEF LDSVQKSLQCRRLREKLV TMTSMKKVDIALFSQEVRELMNCPWRLNITHRELHRTELW  
SCCNASDRMLVTRQNTNQNQSLTYEVERRMKRKVDQALWEMLPQTVPW SKGSLSRCAVVGSG  
GILQNSSCGAEIDSADYIIRFNLGPVTNSKDVGNKTHLMTINPSQIRGYRNLT KAPQPLANR  
VAVYGNASLLLPAFSYQFSTGLSLDVYHALQPLRPYQKV VFFNPNFMLNLGRKWK GQGLKEP  
RLSTGLMLASVAMELCEEVHIYGF WPFSLDLNHNPLPHHYD N VGP KIGFHSMP EEFQ LLLK  
LHTQGALQLHLGRC

>Salfon\_GT29\_ST8Sia7

MRYNIYLVLFILVCSASLLSLTLIRRYSHKSINTRTLIMDVRELMNCPHRPNITQRELYRVI  
LRSCCNATGEMILTNQNTKSGQKIH YETNQKLFKTV DKKLHSMLPKALPWSKGLLG HCAVVG  
SGGILQNSSCGAEIDSADYIIRFNLGPVTNSKDVGNKTHLMTINPSQIRGYPNLT KDPQPLA  
NRVAVYGNASLLLPAFSYQFCTGLSLNAYHALQPLRPNQKV VFFNPNFMLNLGRKWK GQGLK  
EPRLSTGLMLASVAMELCEEVHIYGF WPFSLDLNHNPLPHHYD N VGP KKG VHSMPDEFQ LLL  
LKLHTQGV LQLHLGRC

>Corclu\_GT29\_ST8Sia7

MRYSIYLVSFILMCSTSLLSVTLIGRYYHKRSAGFDSYAAFLCNRLRLKFLTVTSAKAINPR  
TLIMDIRQLMDCSHRPNITQRELYRVI LRSCCNATGEMILTNQNTKLGQKIH YETNQKLFKTV  
VDKKLHSMLPNALPWSKGLLGRC AVVGSGGILQNSSCGAEIDSADYIIRFNLGPVSN SEDVG  
NKTHLMTINPSQIRTYRNLT KDPQPLANRVAAYGNASLLSPFSYQFCTGLSLDVYHVL RP  
LRPNQKV VFFNPNFLLQLSRKWKGRGLKEPRLTSGMLLASVAMELCEEVHLYGF WPFPLDLY  
HNPLPHHYD N VGP KKG VHSMPDEFLLMLQLHTQGV LQLHLGGC

>Thythy\_GT29\_ST8Sia7

MRYLILFILVCSGTL LSIILIDYYQHQRDGF LDSVQKRLHCRRLTEKLV TMTTMKKANIALF  
SQEVRELMDCPWRLNLTHRELHRTELWSCCNASDRMLVTRQNTNQNQILT YEAEKWRKRKVD  
KALWEMLPQTVPW SKGSLSRCAVVGSGGILQNSSCGAEIDTADYVIRFNLAPINKSCDVGVK  
TDLITANPSQIIKGYHNLQRNPGPLVKRMSVYGHALLLHAF AFGFGTSPCFKVYHALRKAR  
PQQEVVFFHPDYLLQLDRFWRRRGQRAPRLSTGLMLASTALEICEQVHLYGF WPFHLDLSQN  
TLPHHYD N VGP SRFMHAMPEEFL LLLQLHSQ GALQLHVGPCTL

>Thythy\_GT29\_ST8Sia7-B

MRYSIYLVTFIMVCSASLLSVTFIGRYYHKRSGGFDGYAAFLCNRLRLKFLNVTSAKAINTR  
TLIMEVRQLMNCTYRPNITQRELYRVTLRSCCNATGEMILTNQNTKLGQKIH YETNQKQFKT  
VDKKLHSMLPKALPWSQGLLG HCAVVGSGGILQNSSCGAAIDSADYIIRFNLGPVSN SEDVG  
NNTNLMTINPSQIRTCYRNLT KDP RPLANR VAVYGNASLLSPFSYQFSTGLSLDVYRALRP  
LRPNQV LFFNPNFLLKLGRKWKERGLKESRLTSGMLLASVAMELCEEVHLYGF WPFPLDLYD  
NPLPHHYD N VGP NKG IHSMPNEFR LLLKLHTLGV LQLHLGSC

>Angang\_GT29\_ST8Sia7

MAAYLLKWSFLLMMITMMVHTFVVL RGTIWI VRDEMTDFQKLRCTKLREIIFSLT ASKINTK  
SFTEDVRALMSCPHE SNITQRE RHRVELRSCCNATGSLFLTRQNTREGQR I KYETNRKKNIL  
VDKSI FKMLPKSTPWRNDSRFQRC AVVGNGGILRNSSCGAEIDSADIVFRLNMAPINNSRDV

GVKTSLV TINPSQIRVGY PDLQKR PQLVERV SAYGDAPLLMPAFAYTTCTDISFKVHKVVQ  
KMRPNQKV VFFNPEY LLELFQYWKHRGLEELRLTTGLMLASVAMELCDSVHLYGFWPFELDL  
FQCPVTHHYD N VGPSRRMHAMPKEFLQLLKMHCQGS IHLQLTRCH

>Ambmex\_GT29\_ST8Sia7-B

PVKQTHSERRSPEAMITHSKAKCQKLRRI FATLSANKTINERSIMRNAVELQRCPWLENRKK  
KEFYRSEINQCKT SHELILTQENTQVGEDIVYETQKSKKINVTTKIFNMFPKESPFSGKAY  
KTCAVVGN GAILVDSCCGQQIDQAEFVFRFNLPPLNYTRDAGR RVDLVTANPSIMINRFQSL  
NQRRKAFGNTLREYRGALILMAAFSHTRSTQVAFKVQYTLDDFGLGSRMLS FHPVYLENLAK  
YWRSGLYVKRLSSGIMLVSAAMELCDSITLYGFWPFYSNLEGR TIGYHYD KMAPNIQVHA  
MPKEFLIYSQMHAQGALKLQVGQCS

>Pelnig\_GT29\_ST8Sia7

MVRRWKVLLILSTGLAGFLFYQNLQTQHGPVHHR SKKTKTTLPPKECSHLKSLILNSVMKIF  
RRKTF FEVVKALQGC PWREDQTERNLLKAKFRKCCNASYSMMVTQENTPIGHI IHYDGDKGR  
KNVTESLYSLFPEKSPFQKPIRSCAVVGN GGILNSSFCGAEIDRANFVFRNLNPPMNW TNDV  
GTKTDVV TANPSILIDKFGSLMERRKPFITRMKEYGSTLIILPAFSYLLNTAVSLRALYTIS  
DFNLNSRAVFFNPDYLRNL TAYWKDMGIKSLRLSSGLMLVSAAIEMCDKVTLYGFWPF SQDL  
DGVPIPHHYDNALPTPKIHSMPDEFYQFLQMHIOGSLRLNLGQC

>Aptausman\_GT29\_ST8Sia7

MPNSISMEEYVNPGLLKMHLWVRL LAVA AVSLFSVFFLVWSDGRPD IKVPEAEACQVLLSN  
LTESFLKRVNEVWLSRHLKLMQSCRWNFNASALAQYRAELGHCCNASAWLV LTRVNTPLGTK  
IVYDGDH SKSLKVSSGLEILPEESPFQDPFYKTCAVVGN GGILLNSSCGSEIDGHQFVIRF  
NLPSTDFPEDVGRKSSIVTVNPSILQERFHGLTGRRLPFVKAAAFYGETWFLI PAFSYPGQN  
EASYRALYALQDSGSRSPVFFFHPQYLSALSRYWHERGFHTPRLSSGFMLVNAALELCQHIT  
LYGFWPFSLHPDGHPLPHHYDNLQPKPRVHLMPQEFAYYVNMHFQGV LHLHLGKC

>Cuccancan\_GT29\_ST8Sia7

MSESDATMPVSAFSKMPNSISREEHVKPGLLKHKHLWVLLVATAASLVSMWFLVLNDR TQL  
GHYCNASAWLAVTQENTPLGSNIVFDGYRSKSLKVSSGLEILPEKSPFQD LLYKTCAVVGN  
GGILRNSSCGSQIDGYQFVIRFNLP SADFPELVGRKSSIVTVNPSILHKRFHGLNGRRLPFV  
EAAASYGKTWFFI PAFSYPGNSEASYRAFYALQDSESQSHVFFFHPQYLSALS KYWHDGRGFH  
TYRLSSGFMLVNAALELCEHITLYGFWPFSLHPDGHALPHHYDNLVLPNQRIHIMPREFAYY  
VDMHFQGV LRLHVGRC

**Supplementary data2: Multiple sequence alignment of the 147 selected vertebrate ST8Sia sequences:** 129 mono-  $\alpha$ 2,8-sialyltransferases *i.e.* 17 ST8Sia I, 15 ST8Sia V, 63 ST8Sia VI and 34 ST8Sia VII and 18 oligo- $\alpha$ 2,8-sialyltransferases ST8Sia III, which are used as an outgroup were aligned using Clustal Omega in MEGA 7.0. Species name abbreviations are given in supplemental data1 legend.

```
#Mega
!Title siat8.txt;

#Takrub_GT29_ST8Sia3-B
IP-----LTNALNEELHGKASKWKFNFKTAFAHQQRKDILGFIDIPNNF-----
-----SLTKDRVRVQQLMHFDYSSHKYVFSISNNFKSLLP-----D-TSPIH
NK---HYSLCSVVGNSGILTGSHCGANIDQADVFVRCNFAPTE-VYSKDVGRKTNMTTFN
PSILERYNNLLTIQDRNNFFLNKLLKLGAILWIPAFFLHTSATVTRTLVDFFVEHKGQL
KVELAWPGNIMHDVNKYWKNKNSPKRVSTGIFMYTLASAMCDEIHLYGFWPFWDPTG
KELPYHYDDKKGTKFTTKWQETHQLPTEFKLLYKLHREGVIRLSLTHCT-----

#Tetnig_GT29_ST8Sia3-B
IP-----LTNALNEELHGKASKWKFNFKTAFAHQQRKDILGFIDIPNNF-----
-----SLTKDRVRVQQLMHFDYSSHKYVFSISNNFKSLLP-----D-TSPIH
NK---HYSLCSVVGNSGILTGSHCGANIDQADVFVRCNFAPTE-VYSKDVGRKTNMTTFN
PSILERYNNLLTIQDRNNFFLNKLLKLGAILWIPAFFLHTSATVTRTLVDFFVEHKGQL
KVELAWPGNIMHDVNKYWKNKNSPKRVSTGIFMYTLASAMCDEIHLYGFWPFWDPTG
KELPYHYDDKKGTKFTTKWQETHQLPTEFKLLYKLHREGVIRLSLTHCT-----

#Orylat_GT29_ST8Sia3-B
IP-----LTTALNEELQGKPKYKWFNFRTAFYQQRKDIFSYIDIPNNF-----
-----SLTKNSVRVQQLMHFDYSSHKYVFSISNNFKSLLP-----E-ISPIL
NK---HYSVCAVVGNSGILTGSHCGPEIDQADVFVRCNFAPTD-VYSKDVGRKTNMTTFN
PSILERYNNLLTIQDRNNFFLNKLLKLEGAILWIPAFFLHTSATVTRTLVDFFVEHKGQL
KVELAWPGNIMHNVNKYWKTKNLSPKRSLTGILMYTLAFSMCDEIHLYGFWPFWDPTG
KDLPHYHYDDKKGTKFTTKWQETHQLPSEFKLLYKLHREGVTKLGLSHCT-----

#Gasacu_GT29_ST8Sia3-rB
IP-----LTNALNEELQGKPSKWFNFKTAFAHLQKKDIFSYIDIPTNF-----
-----SLTKNSVRVQQLMHFDYSSHKYVFSISNNLKSLLP-----D-ASPIR
NK---HYSVCAVVGNSGILTGSHCGPEIDQADVFVRCNFAPTE-VYSKDVGKKTNLTTFN
PSILERYNNLLTIQDRNNFFLNKLLKLEGAILWIPAFFLHTSATVTRTLVDFFVEHKGQL
KVELAWPGNIMHDVNKYWKTKNLSPKRSLTGILMYTLASAMCDEIHLYGFWPFWDPTG
NDLPYHYDDKKGTKFTTKWQETHQLPSEFKLLYKLHRDGVIKLSLTHCS-----

#Anocar_GT29_ST8Sia3
VP-----NTNSLNHELQDKSPKWFNFRTAFLOQRREILQHVVDVIKNF-----
-----SLTKNMVRIQQLMHYDYSSHKYVFSISNSFRMLLP-----D-VSPIQ
NK---HYNICAVVGNSGILVGSQCGQEIDKYDFVRCNFAPTE-AFHKDVGRKTNITTFN
PSILEKYNNLLTIQDRNNFFLNKLLKLDGAILWIPAFFFHTSATITRRTLVDFFIEHRAQL
KVQLAWPGNIMQHVNRKYWKNKHLAPKRLSTGILMYTLASAICDEIHLYGFWPFWDPTG
EDLPYHYFDKKGTKFTTKWQESHQLPAEFQQLFRMHSEGLAKLTLSHCA-----

#Siltro_GT29_ST8Sia3
VP-----ITNSLTQELQEKPAKWFNFNTAYARQRREILQNVVDVIRNF-----
-----SLTKNSVRTGQLMHYDYSSHKYVFSISNNFRSLLP-----D-TSPVM
NK---RYNCAVIGNSGILTESQCGAEIDKADVFVRCNFAPTE-GFQKDVGRKTNLTTFN
PSILEKYNNLLTIQDRNNFFLNKLLKLDGAILWIPAFFFHTSASVTRTLVDFFVEHRDQL
KVQLDWPGNIMQHVNRKYWKNKHLSPKRLSTGILMYTLASSVCEEIHLYGFWPFWDPTG
```

KDLPYHYDDKKGTKFTTKWQESHQLPAEFKLLYKMHREGLTKLTLSCA-----

#Bostau\_GT29\_ST8Sia3

VP-----FPHSVTHELQARP-KWTFNRTAFLHQRQEILQHVDVIKNF-----  
-----SLTKNSVRIGQLMHYDYSSHKYVFSISNNFRSLLP-----D-VSPIV  
NK---RYNICAVVGNISGILTGSRGCPQIDKSDVFRFCNFAPTE-AFQRDVGRKTNLTTFN  
PSILEKYNNLLTIQDRNNFFLSLKKLDGAILWIPAFFFHSTATVTRTLVDFVVEHRGQL  
KLQLAWPGNIMQHVNRWKNKHLSPKRLSTGILMYTLASAVCEEIHLYGFWPFPGFDPNTR  
EDLPYHYDDKKGTKFTTKWQESHQLPAEFQLLYRMHGEGGLTKLTLSCA-----

#Galgal\_GT29\_ST8Sia3

VP-----ITNSLQELQEKPSKWFNRTAFAQQRQEILQHVDVIKNF-----  
-----SLTKNSVRIGQLMHYDYSSHKYVFSISNNFRSLLP-----D-VSPIL  
NK---HYNVCAVVGNISGILTGSCQGEIDKSDVFRFCNFAPTE-AFQKDVGRKTNLTTFN  
PSILEKYNNLLTIQDRNNFFLSLKKLDGAILWIPAFFFHSTATVTRTLVDFVVEHRGQL  
KVQLAWPGNIMQHVNRWKNKHLSPKRLSTGILMYTLASAICEEIHLYGFWPFPGFDPNTR  
EDLPYHYDDKKGTKFTTKWQESHQLPAEFQLLYRMHGEGGLAKLTLSCA-----

#Canlupfam\_GT29\_ST8Sia3

VP-----ITNSLTHELQEKPSKWFNRTAFLHQRQEILQHVDVIKNF-----  
-----SLTKNSVRIGQLMHYDYSSHKYVFSISNNFRSLLP-----D-VSPIV  
NK---HFNICAVVGNISGILTGSRGQGEIDKSDVFRFCNFAPTE-AFQRDVGRKTNLTTFN  
PSILEKYNNLLTIQDRNNFFLSLKKLDGAILWIPAFFFHSTATVTRTLVDFVVEHRGQL  
KVQLAWPGNIMQHVNRWKNKHLSPKRLSTGILMYTLASAICEEIHLYGFWPFPGFDPNTR  
EDLPYHYDDKKGTKFTTKWQESHQLPAEFQLLYRMHGEGGLTKLTLSCA-----

#Ratnor\_GT29\_ST8Sia3

VP-----ITNFLTHELQEKPSKWFNRTAFLHQRQEILQHVDVIKNF-----  
-----SLTKNSVRIGQLIHYDYSSHKYVFSISNNFRSLLP-----D-VSPIL  
NK---RYNICAVVGNISGILTGSCQGEIDKSDVFRFCNFAPTE-AFHKDVGKKTNLTTFN  
PSILEKYNNLLTIQDRNNFFLSLKKLDGAILWIPAFFFHSTATVTRTLVDFVVEHRGQL  
KVQLAWPGNIMQHVNRWKNKHLSPKRLSTGFLMYTLASAICEEIHLYGFWPFPGFDPNTR  
EDLPYHYDDKKGTKFTTKWQESHQLPAEFQLLYRMHGEGGLTKLTLSCA-----

#Musmus\_GT29\_ST8Sia3

VP-----ITNSLTHELQEKPSKWFNRTAFLHQRQEILQHVDVIKNF-----  
-----SLTKSSVRIGQLMHYDYSSHKYVFSISNNFRSLLP-----D-VSPIM  
NK---RYNCAVVGNISGILTGSCQGEIDKSDVFRFCNFAPTE-AFHKDVGRKTNLTTFN  
PSILEKYNNLLTIQDRNNFFLSLKKLDGAILWIPAFFFHSTATVTRTLVDFVVEHRGQL  
KVQLAWPGNIMQHVNRWKNKHLSPKRLSTGILMYTLASAICEEIHLYGFWPFPGFDPNTR  
EDLPYHYDDKKGTKFTTKWQESHQLPAEFQLLYRMHGEGGLTKLTLSCA-----

#Homsap\_GT29\_ST8Sia3

VP-----ITNSLQELQEKPSKWFNRTAFLHQRQEILQHVDVIKNF-----  
-----SLTKNSVRIGQLMHYDYSSHKYVFSISNNFRSLLP-----D-VSPIM  
NK---HYNICAVVGNISGILTFIQGREIDKSDVFRFCNFAPSE-AFQRDVGRKTNLTTFN  
PSILEKYNNLLTIQDRNNFFLSLKKLDGAILWIPAFFFHSTATVTRTLVDFVVEHRGQL  
KVQLAWPGNIMQHVNRWKNKHLSPKRLSTGILMYTLASAICEEIHLYGFWPFPGFDPNTR  
EDLPYHYDDKKGTKFTTKWQESHQLPAEFQLLYRMHGEGGLTKLTLSCA-----

#Pantro\_GT29\_ST8Sia3

VP-----ITNSLQELQEKPSKWFNRTAFLHQRQEILQHVDVIKNF-----  
-----SLTKNSVRIGQLMHYDYSSHKYVFSISNNFRSLLP-----D-VSPIM  
NK---HYNICAVVGNISGILTGSCQGEIDKSDVFRFCNFAPTE-AFQRDVGRKTNLTTFN  
PSILEKYNNLLTIQDRNNFFLSLKKLDGAILWIPAFFFHSTATVTRTLVDFVVEHRGQL  
KVQLAWPGNIMQHVNRWKNKHLSPKRLSTGILMYTLASAICEEIHLYGFWPFPGFDPNTR  
EDLPYHYDDKKGTKFTTKWQESHQLPAEFQLLYRMHGEGGLTKLTLSCA-----

#Danrer\_GT29\_ST8Sia3

TS-----LNTALNENLQE-SSNWRFNRSAYAEINKEIAQHIDVPHNF-----  
-----TLTKNSVRVQGLMHYDYSSHKYVFSIGENLRSLLP-----D-ASPVL

NK---RYNTCAVVGNSGILTGSRGPEIDKYDFVFR CNFAPTE-VFRRDVGRRTNLTTFN  
PSILEKYNNLLTIQDRNNFFLSLKKLDGAILWIPAFFFH TSATVTRTLVDFVVEHKGQL  
KVQLAWPGNIMQYVNYWKTQKLSPKRLSTGILMFTLASSLCEQVHLYGFWPFWD PNTG  
KELPYHYDDKKGTKFTTKWQESHQLPTEFKLLFKMHADGVLKLSLSHCA-----

#Orylat\_GT29\_ST8Sia3-A

TS-----LSSAINEDLKN-SSKWTYNSTAFIQLRTEISHHIDMPHNF-----  
-----TLTRDAVKVQGLMHFDYSSHKYVYSIGENFRSLLP-----E-VSPIL  
NR---HYNVCAVVGNSGILTGSLCGAQIEKYDFVFR CNFAPTE-IFKKDVGRRTNMTTFN  
PSILEKYNNLLTVQDRNNFFLSLKKLDGAILWIPAFFFH TSATVTRTLVDFVVEHKGQL  
KVQLAWPGNIMQYINNYWKTQKLSPKRLSTGILMYTLASSMCDQIHLYGFWPFWD PNTG  
KELPYHYDDKKGTKFTTKWQESHQLPAEFKLLHKMHTEGLLKLTL SHCA-----

#Tetnig\_GT29\_ST8Sia3-A

IP-----LTSALSEDLQN-SSKWSHNGSAFTQLKKEISQYIDIPRNF-----  
-----TLTRDSVRIGQLMHDYSSHKYVFSIGENFRSLLP-----E-VSPIL  
QK---HYNVCAVVGNSGILTGSRGQEI DSLDFVFR CNFAPTE-LFKKDVGRRTNMTTFN  
PSILEKYNNLLTVQDRNNFFLSLKR LDPAILWIPAFFFH TSATVTRTLVDFVVEPRGQL  
KVQLAWPGNIMQYINNYWKTQKLSPKRLSTGILMYTLASSMCDQIHLYGFWPFWD PNTG  
RELPHYHYDDKKGTKFTTKWQESHQLPTEFKLLYKMHREGVLKLSLSHCG-----

#Takrub\_GT29\_ST8Sia3-A

TP-----LTSSLESDLQN-ASKWSFNSSAFAQLKNEISQYIDVPRNF-----  
-----TLTRDSVRIGQLMHDYSSHKYVFSIGENFRSLLP-----E-TSPIL  
QK---HYNVCAVVGNSGILTGSRGQO I DRFDFVFR CNFAPTE-IFKKDVGRRTNMTTFN  
PSILEKYNNLLTVQDRNNFFLSLKKLD TTILWIPAFFFH TSATVTRTLVDFVVEHKGQL  
KVRLAWPGNIMQYINNYWKTQKLSPKRLSTGILMYTLASSMCDQIHLYGFWPFWD PNTG  
KELPHYHYDDKKGTKFTTKWQESHQLPTEFKLLYKMHREGVLKLSLSHCA-----

#Gasacu\_GT29\_ST8Sia3-rA

SP-----LTNALGEDLQN-SSKWTYNSSAFLQLKNEISQYIDIPHNF-----  
-----TLTRDSVRIGQLMHDYSGHKYVFSIGENFRSLLP-----E-VSPIL  
NK---HYNVCAVVGNSGILTGSRGQOIEKFDFVFR CNFAPTE-IFKKDVGRRTNMTTFN  
PSILEKYNNLLTVQDRNNFFLSLKKLDG VILWIPAFFFH TSATVTRTLVDFVVEHKGQL  
KVRLAWPGNIMQYVNSYWKTKQKLSPKRLSTGILMYTLASTMCDQIHLYGFWPFWD PNTG  
KELPHYHYDDKKGTKFTTKWQESHQLPAEFKLLYKMHTEGLLKLTL SHCA-----

#Danrer\_GT29\_ST8Sia7-B

-----HGCRMRLQYCCNATHSL-----  
-----ILTKRNTAVDHIITYETEGKRT-YRVKADLHKMLP-----E-DSPWS  
AG---ALGLCAVVGSSGILKNSSCGRQID SADFVIRFNLALVN--DS-DVGLKTDLMNIN  
PSQI-RRYKTM--QDPGPLVERISVYGNSSLIIPAFAYGFCTSPSLRVLRVLPQIRPQ-  
QPVVFFNPHYLRALDRFWKWRGLKEPRLSSGFILISA ALEMCEHVHVYGFWPFGTDLQE-  
NPVPYHYDDQSKPSP-----YHMRMPEEFVRLQLHSQGALTLHLQPCHTHRAVFPNPVP

#Danrer\_GT29\_ST8Sia7-A

SVIKPAKSIKFSF---AREVSDFLSCPYSNETEQELNRIRLRFCCNATESF-----  
-----VLTKRNTAISQSI PYETNSRRT-YKMNADVHKLLP-----E-DSPWS  
AG---ALGLCAVVGSSGILKNSSCGRQID SADVIRFNLALIN--DS-DVGLKTNLITIN  
PSQI-RGYRNLE--KKPGPLVKRVSVYGNSSLIIPAFAYVICTSPSLRVLRVLPQIRPQ-  
QPVLFFSPHYLRALDRFWKGRGLKERRLSTGFMLISA ALEMCEHVHVYGFWPFGTDLQE-  
NPIPHYHYDDQMSR-G-----SVHRMPEEFVRLQLHSQGALTLHLQPCDTH-----

#Pimpro\_GT29\_ST8Sia7

SIIKSAKSIKFRF---TQELSDYLSCPYSNQTERELNRIRLQFCCNATGSF-----  
-----ILTKRNTAITQSIQYETST-KT-YKMKAE LHKMLP-----E-DIPWS  
GR---RLGRCAVVGSSGILKNSSCGREIDNADFVIRFNLA EVN--DS-DVGLKTDLITIN  
PSQI--RYKNLQ--NNPDPLVERVSVYGNASLIIPAFAYTFCTSVSIVLKVLPQIRPH-  
QPVVFFSPSYLRSLDRFWKGRGLQEERLSTGFMLI STALELCEHVHVYGFWPFDDNDLQD-  
QPIPHYHYDDLSPSS-----HRHKMPEEFVRLQLHSQGALTLHLLPCDSPETDRENNL-

#Catcat\_GT29\_ST8Sia7

AIIKPAKSIQLQRF---TQELSDFMSCPYKSNTTERELNRMRLQYFCNATGSL-----  
-----FLTKRNTAINQTIPIYETSTVKT-YKMNAAIHGMLP-----E-DFPWS  
GR---RMGRCAVVGSGGILKNSSCGREIDSADYVIRFNLASIN--DS-DVGLKTDLITIN  
PSQI--QFKNLD--KNPEPLVERVSVYGNASLIMPAFAYTFCTGQSIKTLRVLHPIRPQ-  
QPVVFFSPTYLRTLDRFWKGRGLKEVRLSTGFMLISTALELCEVDHVYGFWPFPGTDLHN-  
NSVPYHYDQLSPHR-----YMHAMPEEFVRLQLLHSGALTLHLQPCS-----

#Gymprzprz\_GT29\_ST8Sia7

SIIKPAQSIKLESF---TQELSDFMNCPHKPNTTERELNRMRMQFCCNATGSL-----  
-----FLTKRNTAINQTIPIYETSTIRT-YMNPNVIHSMLP-----E-DFPWT  
GR---RLGRCAVVGSGGILKNSSCGREIDSADVFIRFNLAYIN--DS-DVGLKTDLVTIN  
PSQI--RYKNLE--QNPDPPLVERVSVYGNASLAMAFAFAYTFCTGLSIKTLKVLHPIRPQ-  
QPVVFFSPIYLRTLDRFWKGRGLKSIKTLRVLHPIRPQ-  
NSVPYHYDQLSPHR-----YKHKMP-----

#Sinrhi\_GT29\_ST8Sia7

SIIKPAKSLNLESF---TQELSDFMSCPYKSNTTERELNRMKLOFCCNATRSL-----  
-----FLTKRNTAVNQTIPYETSTIST-YTMNDTLHSMLP-----E-DFPWS  
GR---RLGRCAVVGSGGILKNSSCGREIDSADVFIRFNLASIN--DS-DVGLKTDLVTIN  
PSQIQREYKDL--KKNPPLVKRVSVYGNASLIMPAFAYTFCTGLSIRTLKALHPIRPQ-  
QPVVFFSPYYLQTLDRFWKGRGLKSIKTLRVLHPIRPQ-  
NPVPYHYDQLSPHR-----RMHKMPEEFVRLQLLHSGALTLHLQPCSSDAS-----

#Sinans\_GT29\_ST8Sia7

SVITSVKRLNMESEF---TEELVDLFLKCPQKPNTEQELNRMKLOFCCNATGSI-----  
-----FLTKRNTAINQTIPIYETDTKHT-YRMNAAIHNMLP-----E-DFPWS  
GR---RLGRCAVVGSGGILKNSSCGREIDSADVFIRFNLASIN--DS-DVGLKTDLVTIN  
PSQIQREYKDL--KKNPPLVKRVSVYGNASLIMPAFAYTFCTGLSIRTLKALHPIRPQ-  
QPVVFFSPYYLQTLDRFWKGRGLKSIKTLRVLHPIRPQ-  
NLVPYHYDQLSPHR-----SMHKMPEEFVRLQLLHSGALTLHLQPCSSDAS-----

#Lepocu\_GT29\_ST8Sia7

LGMQSLKKNVSTLL---CGQVTQLMRCPWTLNLTQLEQQORTELRSLSCNATGRL-----  
-----VVTQDNTPLGGTITYDAEKWT--RQVDTEIFNMLP-----Q-SPPWA  
GGPGARLRRCVAVGNGGILRNSSCGAHDRAFDVIRFNLPPLN--YSRDVGVKSSLVTVN  
PSQIINSYRNLN--YARRPFVQRVSTYENAHVLPFAFAF'SFCTDPCFRVYYTLQDNRP-  
QRALFYHPDYLRQLATYWQEKGLRETRLSTGLMMVSAALELCEVLYGFWPF'SFDLSE-  
RPLSNHYDDVPPNR-----GMHAMPEEFVRLQLLHSGALTLHLQPCSSDAS-----

#Angang\_GT29\_ST8Sia7

FSLT-ASKINTKSF---TEDVRLMSPHESNITQERHRVELRSCCNATGSL-----  
-----FLTRQNTREGQRIKQYETNRKKN-ILVDKSIKMLP-----K-STPWR  
ND--SRFQRCVAVGNGGILRNSSCGAEIDSADIVFRLNMAPIN--NSRDVGVKTSLVTVN  
PSQIRVGYPDQ--KRPQPLVERVSVYGNASLIMPAFAYTTCTDISFKVHKVQKMRPN-  
QKVVFFNPEYLLELFQYWKHGLEELRLTTGLMLASVAMELCDSVHLYGFWPFELDLFQ-  
CPVTHHYDDVPPNR-----RMHAMPEEFVRLQLLHSGALTLHLQPCSSDAS-----

#Salsal\_GT29\_ST8Sia7-B

VTMTSMKKVDIALF---SQEVRELMNCPWRNLNITHRELHRTELWSSCNASDRL-----  
-----MVTRQNTNQNQSLTYEVERRMK-RKVDQALWEMLP-----Q-TVPWS  
KG---SLSRCVAVGSGGILQNSSCGAEIDSADYIIRFNLPVVT--NSKDVGNKTHLMTIN  
PSQIR-GYRNLN--KAPQPLANRVAVYGNASLLLPAFASYQFSTGLSLDVYHALQPLRPY-  
QKVVFFNPNFMLNLGRKWKQGLKEPRLSTGLMLASVAMELCEEVHLYGFWPFSLDLNH-  
NPLPHHYDDVPPNR-----GFHSMPEEFVRLQLLHSGALTLHLQPCSSDAS-----

#Salsal\_GT29\_ST8Sia7

LTLTSAKAINMRTL---IMDVRQLMTCTHRPNITQRELYRVILRSCCNATGEM-----  
-----ILTKQNTKLGQKIHYETNQKLF-KTVDKKLHSMMLP-----K-DLPWS  
KG---LLSHCAVVGSGGILQNSSCGAEIDSADYIIRFNLPVVT--NSKDVGNKTHLMTIN  
PSQIR-GYRNLN--KAPQPLANRVAVYGNASLLLPAFASYQFSTGLSLDVYHALQPLRPY-

QKVVFNNPMLNLGRKWKQGLKEPRLSTGLMLASVAMELCEEVHIYGFWPFSLDLNH-  
NPLPHHYDNDVGPKI-----GFHSMPEEFQQLLKLHTQGALQLHLGRC-----

#Salfon\_GT29\_ST8Sia7

-----SINTRTL---IMDVRELMNCPHRPNITQRELYRVILRSCCNATGEM-----  
-----ILTNQNTKSGQKIHYETNOKLF-KTVDKKLHSMMLP-----K-ALPWS  
KG---LLGHCAVVGSGGILQNSSCGAEIDSADYIIRFNLGPVT--NSKDVGNKTHLMTIN  
PSQIR-GYPNLT--KDPQPLANRVAVYGNASLLLPAFSYQFCTGLSLNAYHALQPLRPN-  
QKVVFNNPMLNLGRKWKQGLKEPRLSTGLMLASVAMELCEEVHIYGFWPFSLDLNH-  
NPLPHHYDNDVGPCK-----GVHSMPEEFQQLLKLHTQGVQLHLHLGRC-----

#Corclu\_GT29\_ST8Sia7

LTVTSAKAINPRTL---IMDIRQLMDCSHRPNITQRELYRVILRSCCNATGEM-----  
-----ILTNQNTKLGQKIHYETNOKLF-KTVDKKLHSMMLP-----N-ALPWS  
KG---LLGRCVAVVGSGGILQNSSCGAEIDSADYIIRFNLGPVS--NSEDVGNKTHLMTIN  
PSQIRTGYRNL--KDPQPLANRVAAYGNASLLLPFSYQFCTGLSLDVYHVLRLRPN-  
QKVVFNNPMLLQLSRKWKGRGLKEPRLTSGMLMLASVAMELCEEVHLYGFWPFPLDLYH-  
NPLPHHYDNDVGPCK-----GVHSMPEEFLLMLQLHTQGVQLHLHLGRC-----

#Thythy\_GT29\_ST8Sia7-B

LNVTSAKAINPRTL---IMEVRQLMNCTYRPNITQRELYRVTLRSCCNATGEM-----  
-----ILTNQNTKLGQKIHYETNOKQF-KTVDKKLHSMMLP-----K-ALPWS  
QG---LLGHCAVVGSGGILQNSSCGAAIDSADYIIRFNLGPVS--NSEDVGNNTNLMITIN  
PSQIRTCYRNL--KDPQPLANRVAVYGNASLLLPFSYQFSTGLSLDVYRALRPLRPN-  
Q-VLFFNPNFLKLGRKWKERGLKESRLTSGMLMLASVAMELCEEVHLYGFWPFPLDLYD-  
NPLPHHYDNDVGPKN-----GIHSMPEEFRLLLKLHTLGVQLHLHLGSC-----

#Esoluc\_GT29\_ST8Sia7

VAMTTMKKVDIVPF---SQVRELMDCPWRLNLTREHRLHRTLWACCNASDRL-----  
-----IVTRQNTNHNQTLTYEAERWRK-KLVDQTLWEMFP-----K-NVPWS  
KG---LLGRCVAVVGSGGILQNSSCGEEIDRAHYIIRFNLAPVN--QSRDVGLKTDLITAN  
PSQIIKQYDLH--KNPGRLAEQMSVYGNARLLLPAFSFAFGTAPCFKVYHALQKALPQ-  
QEVVFFHPDYLFELGQFWRRRGQKASRISTGLMLASSALEICDQVHLYGFWPFVLDLH-  
NPLQHYYDNDVGPNH-----YMHAMPEEFLLLLQLHSQGALQLHVGHC-----

#Oncmyk\_GT29\_ST8Sia7

VTMSTIKKVDIALF---SQDVRELMDCPWRLNLTRELYRTELWSSCNASDRL-----  
-----MVTRQNTNQLNQSLSYIEHRWKK-RKVDQALWEMLP-----Q-TVPWS  
KG---SLSRCAVVGSGGILQNSSCGAEIDNADYVIRFNLAPIN--KSCDVGVKTDLVTAN  
PSQIIKGYTDLQ--QNPGLAEVLSFYGHALLLPAFSSASGTAPCFKVYHALRKARPQ-  
QEVVFFHPDYLFELGRFWRHRGQRARLSTGLMLASTALEICEQVHLYGFWPFPLDLSH-  
NSLPHHYDNDVGPNR-----KMHAMPEEFLLLLQLHSQGALQLHVGPCCTLPTP-----

#Thythy\_GT29\_ST8Sia7

VTMTTMKKANIALF---SQEVRELMDCPWRLNLTREHRLHRTLWSSCNASDRL-----  
-----MVTRQNTNQNQILTYEAEKWRK-RKVDKALWEMLP-----Q-TVPWS  
KG---SLSRCAVVGSGGILQNSSCGAEIDTADYVIRFNLAPIN--KSCDVGVKTDLITAN  
PSQIIKGYHNLQ--RNPGLVLRMSVYGHALLLHAFYFGTSPCFKVYHALRKARPQ-  
QEVVFFHPDYLLQLDRFWRRRGQRAPRLSTGLMLASTALEICEQVHLYGFWPFHLDLSQ-  
NTLPHHYDNDVGPSPR-----FMHAMPEEFLLLLQLHSQGALQLHVGPCCTL-----

#Takrub\_GT29\_ST8Sia6-A

-----EI---TDKVNRLYAQTLEKKEDKSKILRSELSSKCQGFKA-----  
-----IITQANTVVGSKIYVDGERKSL-VQVTPPEMNTFP-----K-EHPFP  
NK---TWETCAVVGNGGILSDSGCGKMIQSAQFVIRCNLPLNNGYQDHVGVKTDLVTAN  
PSILVEKYGALM--GRRRPFIESLRSYGNLPTFSYRSNTPVSLRAFYSIEDFGSP-  
TRAI SFNPQYLQKLDVFWRSKGLRAVRLSSGLMVASLALCNSVHLYGFWPFVSNHNPGL  
RTLKNHYDDIIPPK-----KFHAMPEEFELLLKLHTEGVLRRLHLDLDCVPEVNLMGSTG

#Takrub\_GT29\_ST8Sia6-B

-----EI---IDKVNRLYAQTWEKKEDKYKKFRSELSSKCQGFKA-----



-----IITQANTVVGSKIVYDGERKRS-VKVSTEMFNTFP-----K-EHPFP  
NK---TWETCAVVGNGGILSDSGCGKVIDSAQFVIRC�LPPLNNGYQDHVGVKTDLVTAN  
PSILFEKYGALM--GRRRPFIESLRSYGNLILLIPAFSYGNNTPVSLRAFYSIEDFGSP-  
TRTIFFFNPQYLQKLAVFWRSKGLRAVRLSSGLMVASLALCLSNVHLFGFWPFSNHPHGL  
RTLKNHYYDDIQTKK-----KFHAMPVEFELLLQLHTEGVLRRLHLDDCVPGEVNLMSGTR

#Orylat\_GT29\_ST8Sia6

-----EN---IMKALELYSEPWWKQEDNYHQFRSOLNSKCHGLEKA-----  
-----IITQANTPQGTKLVYDAERKRT-LVVNAEVFNTFI-----K-ENPFP  
NK---TWDTCAVVGNGGILANSSCGKTIDSAQFVIRC�LPPLSNGFEKDVGIKSDIVTAN  
PSIITEKYFSLM--RHRPFAMRIYGNMVLIPAFSFGHNTALSMRAFYTLEDFESS-  
ARAVYFNPEYLNLANFWRSEGLKSPRLSTGIMMASIALEVCSEVHLYGFWPFVHPYSH  
QGLTNHYYDDRKAKN-----KFHAMPTEFNLLQLHRKGVLRRLHLGDCTPDEK-----

#Notfur\_GT29\_ST8Sia6

-----ED---IKKALELYSQTWKKQEDSYQNFRSLLNRKCKCFDKA-----  
-----IITQNTPLGSKLVYDGERKRT-LQVNQEIFNTFP-----K-GHPFS  
NK---TLHTCAVVGNGGILANSSCGKTIDSAEFVIRC�LPPLSNGYEKHVGIKTHLVTAN  
PSILMEKYAALM--ARRRPFVENLRSYGDSSMLLIPAFSYGRNTPVSLRAFYTLEDFESP-  
IQSIFFFNPAYLRNLAAFWRSQLKAVRLSTGIIMTSLALEICENVHLYGFWPFVHPYSS  
QDLTNHYYDDRKTKI-----KFHAMPDEFNLLNLHLSQGVLMHMLGDCEPDEKRFHRSD-

#Orenil\_GT29\_ST8Sia6-B

-----EI---ISKVQERYNQTWKKQEDNYLKFRTNLSVKCNGFDKA-----  
-----IITKNTPVGLKLVYDGEKKRT-LQVNKDFNIFT-----K-ENPFS  
NK---KWDTCSVVGNGGILSESSCGKVIDSAFVIRC�LPPLSNGYEKDVGIKTSLV TAN  
PSIFTQRYGSLV--GRRLPFVESLHKGNSLILLIPAFSFGINTAVCQRVAYTIEDFKSP-  
IRPVFFNPQYLDLSLAQFWRSEGLKERRLSTGLIMASMALELCENVHLYGFWPFVHPYGF  
YTLTNHYYDDKPAKT-----SFHAMPAEFDRLQLHTEGVLRRLHLEDCK-----

#Gasacu\_GT29\_ST8Sia6

-----QF---IDKVRERYNKTWIKQVDDYLEFRSOLSRKCHGFDSA-----  
-----FITQYNTPVGAKIVYDGEKTRT-LQVTPEIFSTFP-----K-EHPFS  
NK---IWGTCSVVGNGGILSNSSCGKVIDSAEFVMRC�LPPLDNGYENDVGIKTDLVTAN  
PSILIKKYGSLQ--QRRRPFVESLRSYGNLILLIPAFSYGFNTPLSLRAVYSIEDFKSP-  
TRPVFFNPPEYLESGLFWRSRGLKAVRASTGLMMASLALHCTDVHLYGFWPFVGNHPQGL  
HALTNHYYDDVQPKN-----TVHAMPVEFEFLQLHSQGVLRRLHLEDQCPGEK-----

#Anofim\_GT29\_ST8Sia6

-----EV---INKVIERYSKTWKKQEENYQKFRSOLSSKCHGFDKA-----  
-----IITQANTPVGAKLVYDGEKKRT-LQVTPEIFSTFA-----K-EHPFQ  
NK---IWDTCAVVGNGGILTNSCGKTIDSAQFVMRC�LPPLDKGYEKHVGIKTDLVTAN  
PSILLEKYGALM--GRRRPFVESLRSYGNLILLIPAFSFGFNTPVCLRAVYSIEDFESP-  
TRPVFFNPPEYLQKLALFLRSQGLRAPRSTGIIMASLALHCANVHLYGFWPFVSSHPHGL  
HALTNHYYDDRQTKK-----KFHSMPAEFDLLQLHSQGVLRRLHLGDCPPGER-----

#Larcro\_GT29\_ST8Sia6

-----EV---IDKVMERYSQSWERQEDNYQKFRALNNKCHGFDKA-----  
-----IITQANTPVGSKLAYDGEKKRI-LQVTPEIFSTFA-----K-ERPFP  
NK---TWDTCAVVGNGGILTNSCGKVIDSAQFVIRC�LPPLSNGYEKHVGIKTDLVTAN  
PSIFLEKYGGLM--GRRRPFVESLHSGNSLILLIPAFSYGHNTPVSLRVAYSLEDFKSS-  
TRPIFFNPPEYLHSLALFWRSQGLRAVRLSTGIIMASLALHLCANVDLYGFWPFVSNHPHGF  
HTLTNHYYDDRQTKV-----KFHAMPAEFELLLRLHLSQGVLRRLHLGDCQPSEK-----

#Ampoce\_GT29\_ST8Sia6

-----EV---IDKVARYSQPWKRQEDSYQKFRFQLSSKCHGFNKA-----  
-----IITKTNPVGSKLVYDGEKKRT-LQVTPEIFSTFI-----K-DHPFS  
NK---TWDTCAVVGNGGILTNSCGKTIDSAQFVIRC�LPPLANGYEKHVGVKTDLVTAN  
PSILLEKYGALM--GRRRPFVESLRTYGDSSMLLIPAFSFGHNTPVSLRAAYTIEDFESP-  
TRPVFFNPPEYLHSLALFWRSQGLKAVRLSTGLIMASLALHLCANVHLYGFWPFVSNHPHGL  
QPLTNHYYDNRQTKT-----KFHAMPAEFDLLRLHLSQGVLRRLHLGDCPTSGK-----

#Serlaldor\_GT29\_ST8Sia6

-----EI---IDNVIERYSQTWKKQEDNYQKFRSQLNSKCRGFNKA-----  
-----IITQANTPVGSKLVYDGEKRRS-LQVTPEIFSTFV-----K-EHPFS  
NK---TWGTCAVVGNGGILTNSSCGQTIDSAQFVIRC�LPPLKNGYEKHVGNKTDLVTAN  
PSILVEKYGALM--AHRPFVDSLHTYGNL LLLP AFSFGHNTPVSLRAAYTIEDFGSP-  
IKPVFFNPEYLQRLAVFWRSQLRAVRLSTGIIMASLAL ELCADVHLYGFWPFSSTHPHGF  
HPLTNHYYDDRKT KM-----KFHAMP AEFDLLRLRHSQGVLRRLHLGDCRPHEK-----

#Paroli\_GT29\_ST8Sia6

-----EI---IDKVIQRYSQTWKRQEDNYQKIRSQLSSKCHGFDKA-----  
-----IITQANTPVGSKLVYDGEKRT-LQVTPEVFSTFI-----K-ERPFS  
NK---TWDTCVAVVGNGGILTNSSCGQ MIDSAQFVIRC�LPPL ENGYEKHVGTKTDLVTAN  
PSILMEKYGALM--GRRRPFVESLRIYGD SLLLI PAFSYGHNTPVSLRVVYTIEDFESP-  
TRPIFFNPEYLQSLAVFWRSQLKAVRLSTGIIMASLAL ELCNVHLYGFWPFSNHPHGL  
HVLNNHYYDDRKT KT-----KFHAMP AEFDLLRLRHSQ GALRLHLGDC-----

#Lepocu\_GT29\_ST8Sia6

-----EKAN---IDKLAQVHSQTWKRQESRLQTFRAQLNMKQCQGSRA-----  
-----IITQANTLLGSKVTYDGERRKP-VEVTPKLYSTFP-----K-EHPFG  
NV---SFQSCAVVGNGGILANSSCGEEIDGAQFVIRC�LPVDRKYQDDVGNKTDLVTAN  
PSILLERFEGLM--ELRRPFVESLGDYGPMLALPAFSYGHNTPVSLRAVYTLQDFNSP-  
VRAVFLNPEYLQNLARFWKAHGLRTVRLSTGLIVASLAL ELCASVTLYGFWPFSLHPFSK  
QHLTNHYYDDQ QSK-----SFHAMP AEFEQLRLRHSQGVIRVHLGSC-----

#Amical\_GT29\_ST8Sia6

-----EQSV---IDRLLQTHIVDWEKQEHKFQSFRAQLNSRCDGLSKA-----  
-----IISQTNTPLGSKVVYDGEKRP-IQVTPKLFSTFP-----K-EHPFG  
NR---TFTSCAVVGNGGILMNSSCGGEIDEAQFVIRC�LPVDPHGYQRDVGNKTSLV TAN  
PSILLDKFNGLM--ELRRPFVDSLGSYGDPLLVLP AFSYSRNPVSLRALYTLQDFDSP-  
VRPVFLNPEYLNARFWKAQGLQAIRLSTGLIMASLAL ELCANVQLYGFWPFSKDPHSK  
HPLTNHYYDDQ QAK-----TIHAMSTEF SHLLMLHNQGIIRVQLGKCQAGTRRATPSLH

#Angang\_GT29\_ST8Sia6

-----EY-T---IDKMVELYSYAWKKQANFNKFRSQLSSRCRGVSTA-----  
-----IVTQNTPLDSKIYYDGEKRP-LQVTPKLYSTFA-----K-EQPFV  
NV---TWKTCVAVVGNGGILVNSSCGE AIDSAHFVFR CNLPPLDKAYQKDVGNKTNLVTAN  
PSILIEKFEGLM--EYRRPFVESLSDYGEALL LLLP AFSYAHNTPVSLRAFYT LRDFGGR-  
ARPAFLSPAYLQSLAHFWRAQGLRTVRLSTGLIVASLAL ELCANVHLYGFWPHAQH PHDR  
RPLTNHYYDDRQ GK-----KVHAMP AEFGHLLRLHRQGVVRVHLGQCEDRPR-----

#Cluhar\_GT29\_ST8Sia6

-----DS-V---IDKVLERYSKNWKKQENNYKRFRALLSSRCHGATKA-----  
-----VVTQANTPLGSKVVYDGEKRP-LQVTSALFNVP-----K-EPPFG  
NT---SWDTCVAVVGNGGILANSSCGRRIDSAQFVIRC�LPPL EHG YEEDVGNKTDLVTAN  
PSILHEKFGGLM--ERRRPFVEGLRPGNSL LLLP AFSYSHNTPVSLRAVYTL EDFRSP-  
ARPVFLSPDYLTSLARFWRSQLRSVRLSTGLIVASLAL ELCNTVDLYGFWPFSQHPHGH  
QPLTNHYYDNRETKK-----KIHAMP AEFDHLLRLRHGQGILRVHLGQCPRSDG-----

#Esoluc\_GT29\_ST8Sia6

-----DTTI---IEKVVEHYSHSWKKQEDNFRKFRSLLRNTCHGLTKA-----  
-----VVTQSNTPLGSKVVYDGEKRP-LQVTAELFSTFA-----K-EHPFV  
NA---TWDTCVAVVGNGGILANSSCGERIDSAQFI IRC�LPPL ANGYERDVGNKTDLVTAN  
PSILQEKYKGLQ--EHRLPFVKSLSYGD SFVLLP AFSYGHNTPLSLRALYTIQDFNSP-  
SRPIFLNPEYLRSLARFWRSQLKTARLSTGLIVASLAL ELCANVHLYGFWPFSQHPQH  
RPLTNHYYDDRQ SK-----TVHAMP AEFDQLQRLHNQGVLRRLHLGECAPAAAT-----

#Onckis\_GT29\_ST8Sia6-A

-----DT-V---TDKVVELYSYSHSWKKQEDKFRNFRSLLSNRCNGLTKA-----  
-----MVTQANTPLGSKVVYDGEKRP-LQVTPELFSTFA-----K-ENPFV  
NT---TWDTCVAVVGNGGILANSSCGEKIDSAQFVIRC�LPPL ENGYERDVGNKTDLVTAN

PSILMEKYGGLQ--ERRRPFVESLRSYGDLSMLLLPAFSYGHNTPVSLRALYTIQDFDSP-  
SRPVFLNPEYLQSLARFWQGOGLRTVRLSTGLIVASLALALELCANVHLYGFWPFNEHPHRH  
QPLTNHYYDDRQSKK-----TVHAMPAEFDHLLRLRHTQGVLRIRHLGECAPTARCRPSSPL

#Salalp\_GT29\_ST8Sia6

-----DT-V---TEKVVERYSHSWKKQEDKFRNFRSLLSNRCHGLTKA-----  
-----MVTQANTPLGSKVVYDGEKRKP-LQVTPELFSTFA-----K-ENPFV  
NT---TWDTCSVVGNGGILANSSCGERIDSAQFVIRC�LPLENGYERDVGNKTDLV TAN  
PSILMEKYGGLQ--ERRRPFVESLRSYGDLSMLLLPAFSYGPNTPVSLRALYTIQDFDSP-  
LRPVFLNPEYLQSLARFWQGOGLRTVRLSTGLIVASLALALELCANVHLYGFWPFNEHPHRH  
QPLTNHYYDNRQSKK-----TVHAMPAEFDHLLRLRHSQGVLRIRHLGECAPAAR-----

#Salsal\_GT29\_ST8Sia6

-----DT-V---TEKVVERYSHSWKKQEDKFRNFRSLLSNRCHGLTKA-----  
-----MVTQANTPLGSKVVYDGEKRKP-LQVTPELFSTFA-----K-ENPFV  
NT---TWDTCSVVGNGGILANSSCGEKIDSAQFVIRC�LPLENGYERDVGNKTDLV TAN  
PSILMEKYGGLQ--ERRRPFVESLRSYGDLSMLLLPAFSYGHNTPVSLRALYTIQDFDSP-  
SRPVFLNPEYLQSLARFWQGOGLRTVRLSTGLIVASLALALELCANVHLYGFWPFNKHPHRH  
QNLTNHYYDDRQSKK-----TVHAMPAEFDHLLRLRHTQGVLRIRHLGECTPTASPGCSS-K

#Oncmyk\_GT29\_ST8Sia6

-----DT-V---TDKVLELYSHSWRKQEDKFRKFRSLLSNRCHGLTKA-----  
-----MVTQANTPLGSKVVYDGEKRKP-LQVTPELFSTFA-----K-ENPFV  
NT---TWDTCSVVGNGGILANSSCGEKIDSAQFVIRC�LPLENGYERDVGNKTDLV TAN  
PSILMEKYGGLQ--ERRRPFVESLRSYGDLSMLLLPAFSYGHNTPVSLRALYTIQDFDSP-  
SRPVFLNPEYLQSLARFWQGOGLRTVRLSTGLIVASLALALELCANVHLYGFWPFNEHPHRH  
QPLTNHYYDNRQSKK-----TVHAMPAEFDHLLRLRHTQGVLRIRHLGECAPTASPGCSS-K

#Onctsh\_GT29\_ST8Sia6

-----DT-V---TDKVVELYSHSWRKQEDKFRNFRSLLSNRCHGLTKA-----  
-----MVTQANTPLGSKVVYDGEKRKP-LQVTPELFSTFA-----K-ENPFV  
NT---TWDTCSVVGNGGILANSSCGEKIDSAQFVIRC�LPLENGYERDVGNKTDLV TAN  
PSILMEKYGGLQ--ERRRPFVESLRSYGDLSMLLLPAFSYGHNTPVSLRALYTIQDFDSP-  
SRPVFLNPEYLQSLARFWQGOGLRTVRLSTGLIVASLALALELCANVHLYGFWPFNEHPHRH  
QPLTNHYYDDRQSKK-----TVHAMPAEFDHLLRLRHTQGVLRIRHLGECAPTASPGCSS-K

#Danrer\_GT29\_ST8Sia6

-----DSVI---IGKALGNYSNSWKKHEANYKRFRLLLNKCHAVSKA-----  
-----VVTQNNTPLGSNVYDGERRKP-LQVTQALFNILA-----K-EQPF  
NA---TWESCAVVGNGGVLANS SCGEEINSAQFVIRC�LPPLDDRYEKDVGNKTNLV TAN  
PSILHEKYSGLM--ERRRPFVESLHSYQALLLLPAFSYGHNTPVSLRAFYTLEDFGREG  
PLPIFLNPEYLRKLTKFWREQGLNSVRPSTGLIMASLALICTNVHLYGFWPFGKHPNDS  
RPITNHYYDNRESKK-----NVHSMPEFEQQLLKLHKQGVVHIRHLGECQPAHR-----

#Cypcar\_GT29\_ST8Sia6

-----DDVL---IAKALENYS DKWKKQETNFKKFRSLLSNKCHAVSKA-----  
-----VVTQNNTPLGSNVIYDGERRKP-LHVTQALFNILA-----K-EQPF  
NA---TWESCAVVGNGGILANSSCGEEINSAQFVIRC�LPPLDKGYEKDVGNKTNLV TAN  
PSILHEKYSGLM--ERRRPFVESLRPYQALLLLPAFSYGHNTPVSLRAFYTLEDFGSNS  
PLPVFLNPDYLRRLSKFWREGLNSVRPSTGLIVASLALICSNVHLYGFWPFSKHPYDS  
QAITNHYYDNRESKK-----NVHSMPTFEFYLLKLHNQGVIRIRHLGKCQPTH-----

#Sinans\_GT29\_ST8Sia6-B

-----DSVL---IAKALENYS DKWKKHEANLKRFRSLMSSKCHAVSKA-----  
-----VVTQNNTPLGSNVIYDGERRKP-LQVTQALFNILA-----K-EQPF  
NA---TWESCAVVGNGGILANSSCGEEINSAQFVIRC�LPPLDKGYEKDVGKKTNLV TAN  
PSILHEKYSGLM--ERRRPFVESLRPYQALLLLPAFSYGHNTPVSLRAFYTLEDFGSNS  
PLPVFLNPEYLRRLSKFWREQGLNSVRPSTGLIVASLALICSNVHLYGFWPFSKHPYDS  
QPITNHYYNDRESKK-----NVHSMNEFAHLLKLHKQGVIRIRHLGECQPTH-----

#Sinans\_GT29\_ST8Sia6

-----DNVL---IAKALENYSHKWKKEANFKRFRSLLSSKCHAVSKA-----  
-----VVTQNNTPLGSNVIYDGERRKP-LQVTQALFNILA-----K-EQPF  
NA---TWESCAVVGNGGILANSSCGEEINSAQFVIRC�LPPLDNRYEKDVGNKTSLV  
TANPSILHEKYSGLM--ERRRPFVESLRPYGQALLLLPAFSYGHNTPVSLRAFYTLEDFGSDS  
PLPVFLNPEYLRRLSKFWRERGLNSVRPSTGLIMASLALICSNVHLYGFWPFNKHPNDS  
RPITNHYYDDRESKK-----NVHSMPTFEFEHLLKLHKQGVIRIHLGECQPT-----

#Sinrhi\_GT29\_ST8Sia6

-----DNVL---IAKALENYSHKWKKEANFKRFRSLLSSKCHAVSKA-----  
-----VVTQNNTPLGSNVIYDGERRKP-LQVTQALFNILA-----K-EQPF  
NA---TWESCAVVGNGGILANSSCGEEINSAQFVIRC�LPPLDNRYEKDVGNKTSLV  
TANPSILHEKYSGLM--ERRRPFVESLRPYGQALLLLPAFSYGHSTPVSLRAFYTLEDFGSDS  
PLPVFLNPEYLRRLKFWRERGLNSVRPSTGLIMASLALICSNVHLYGFWPFNKHPNDS  
RPITNHYYDDRESKK-----NVHSMPTFEFEHLLKLHKQGVIRIHLGECQPT-----

#Pygnat\_GT29\_ST8Sia6

-----ENVI---IDKALRVYSSRWRQEANFKRFRSLLSRNCHALSKA-----  
-----VVTQANTPVGSKLVYDGEKTKP-LQVTSALFNFTA-----K-EQPF  
NA---TWDTCAVVGNGGILANSSCGEKINSADFIIRC�LPPLGSGYEKDVGNQTSLV  
TANPSILIEKFGLM--ERRRPFVESLRPYGDSLLVLPAFSYGHNTPVSLRAFYTLEDFGITS  
ARPVFLNPEYLSLARFWRGQGLRSARLSTGLIVASLALICSNVHLYGFWPFQHPYGR  
QPITNHYYDDRQSKK-----NVHSMPEAFDHLRLRHMQGVIQMHLGACSMNRNRTSN----

#Astmex\_GT29\_ST8Sia6

-----DNAI---IDRLLKSYSRWKRREANFSKFRSLLSSSCHAVSKA-----  
-----VVTQSNTPVGSKLVYDGEKTKP-LQVTKALFNFTA-----K-EQPF  
NA---SWDTCAVVGNGGILVNSSCAEKINSANLVIRC�LPPLGNGYEKDVGNKTSLV  
TANPSILIEKFSGLM--ERRRPFVESLRPYGDSLLLLPAFSYSHNTPVSLRALYALEDFNAVG  
PRPVFFNPEYLSLARFWRGRGLRARTARLSTGLIVTSLALELCTNVHLYGFWPFSLHPHGR  
QTITNHYYDNRQSKK-----NVHSMPSEFEHLLRLHVSQVILHLGECSTTDLNHTEKT-

#Danrer\_GT29\_ST8Sia1

-----SDKEMV---EEVLR--QGQTSRNQTAVELYRKLLTDCCNPKRMF-----  
-----AVTKENSPLGKVLWYDGEFYHY-HTVTNETYPIFV-----Q-DTPLQ  
L----PLKRCSVVGNGGVLKHSKGCNEIDRADFIMRC�LPPLSKDYTDVVGTKTHLV  
SANPSIIIEKSFQNL--WSRKSFVESMKAYGSSYIYIPAFSMKPGTDP SLRAYHALADSSN-  
QTVLFANPDFLKNVGI FWKNHG VHGKRLSTGLFLVSLALGLCEEVTAYGFWPF SVGLDE-  
RPVSHHYYDNILPSS-----RFHAMPEEFLQLWHLHKSGTLRMRVGSACAKERMELKREK-

#Orylat\_GT29\_ST8Sia1

-----RDKDIV---AEVLR--QGDVWRKNQGTGIDLRYRDLTKCCNPKKMF-----  
-----AVTKENSPIGKVLWYDGEIYHS-HTVNSETYQLFI-----K-RRGAA  
S----SCRRCAVVGNGGILKGSKKGKEIDHHYIFRC�LPPLSREYVEDVGTKTHLV  
TANPSIIIEKRFQNLV--WSRKT FVDSMKVYGSYIYMPAFSMAPGTDP SLRAYFALTDVPSN-  
LTMLFANPDFLLSVSKFWKAHG VHARRLSTGLFLVSLAMGLCEVTYGFWPF SVDLDE-  
QPI SHHYYDNILPYK-----WFHAMPEEFVQLWHLHKSGILRMKVGHCSQON-----

#Gasacu\_GT29\_ST8Sia1

-----RDKDIV---EEVLK--QGGVWQKNQGTGIDLRYRDLTECCDPRRMF-----  
-----AVTKENSPTGKVLWYDGEFYHS-HTVNNETYPLLIV-----K-DNPLR  
L----PLKKCAVVGNGGILRHSQCGRIDIQADFLVRC�LPPLSKEYVDDVGTTRTHLV  
TANPSIIIEKRFQNL--WSRKFVDSMKVYGSYIYMPAFSMKTGTDP SLRAYHALADSSN-  
LTMLFANPEFLRTVGRFVKARGVHARRLSTGLFLVSLALGLCEEVTAYGFWPF SVGLDE-  
QPVSHHYYDNILPYT-----WFHAMPEEFVQLWHLHKSGALRVRVGRCSAQGGG-----

#Takrub\_GT29\_ST8Sia1

-----ADKEIV---DEVLR--QGEAWQKNQGTGIDLRYRDLTECCDPRRMF-----  
-----AVTKQNSPLGKVMWYDGEFYHS-HTVNNETYPLFV-----Q-ENPLQ  
L----PLKKCAVVGNGGILRGSKCGKIDRADFIMRC�LPPLSKEYLEDVGTKTHLV  
TANPSI IENRFQNL--WSRKHVDSMKVYGTSYIYMPAFSMSPGTNP SLRAYALADASAN-  
LTMLFANPEFLRSVKGFWKARNVHAKRLSTGLFMVSLALALCKEVTYGFWPF FAIDLDE-

QPVSHHYDNLIPYK-----WFHTMPEEFVQLWHLHKSGTLRMRVGRCPPEDEGGR-----

#Tetnig\_GT29\_ST8Sia1

-----GDKEIV--AEVLR--QGEAWHRNQTGIDLYRRLTDCDDPPKMF-----  
-----AVTKRNSPLGKVMWYDGEFYHS-HTVNNETYRLFV-----Q-DNPLQ  
L----PLKKCAVVGNGGILRASKCGKIDIDQADFIMRCNLPPLSEEYLEDVGTKTHLVTAN  
PSI IENRFQSL--WSRKHFVDSIKVYGTSYIYMPAFSMRPGTEPSLRAYYALADTSSN-  
LTVLFANPEFLRTVVGKFWKARNVHAKRLSTGLFMVSLALALCEEVTVYGFWPFPAIDLDE-  
QPVSHHYDNLIPYK-----WFHTMPEEFVQLWHLHKSGTLRMRVGRCSSQGGGR-----

#Calmil\_GT29\_ST8Sia1

-----DQKEIV--NDVLH---QPVWRRNQTATTAFRRLENCCETKRMF-----  
-----AVTQHNSPMGKNLWFDGEFLHS-LSVNNEMFAMFP-----Q-DTPFQ  
I----PLKKCSVVGNGGILKRSACGDKIDKADFVMRCNLPPLSNEYARDVGHRTQLVTAN  
PSI IKKRYQNL--WSRKAFVESMKVYGRSYIYMPGFSMKAGTEPSFRYYTLDSDVNAN-  
QTIIIFANPDFLRNVQKFWKGVHAKRLSTGLFLVSVALGLCEEVTLYGFWPFSTDLEE-  
RTISHHYDNLVMPDT-----SYHAMPEEFVQLWHLHKSGILKIHVGKCGQIPM-----

#Xenlae\_GT29\_ST8Sia1

-----GHKEMI--RQVL--QFGPRWGRNRSSGDSFRKLLQDCCDPPRLF-----  
-----SMTKANTALGENLWYDGEFFQS-LTIDNTRSLFP-----Q-DTPIK  
L----PLKRCSVVGNGGILKNSRCGEQIDEADFVMRCNLPPLSREYTDVGTQTQLVTAN  
PSI IDKRFQNL--WSRKSFVESVSVYKQSYVYMPAFSTKRGTDPVSLRVYYTLEDFGTN-  
QTVLFANPNFLRVNGKFWKSGVHAKRLSTGLFMVSAALSCEEVTIYGFWPFQMDLGG-  
RHISHHYDNLMLPLS-----GVHAMPEEFVQLWHLHKSGVLMQQLDQCKKDVSSKKPH--

#Siltro\_GT29\_ST8Sia1

-----GHKEMV--REVL--RFGPGWRKNRTEMDSFRKLLQDCCDPPHLF-----  
-----SLTKVNTPLGENLWYDGEFFHS-LTIDNSTRSLFP-----Q-DTPFK  
L----PLKRCSVVGNGGILKNSRCGEQIDEADFVMRCNLPPLSREYTEDVGTTRTQLVTAN  
PSI IDKRYQNL--WSRKSFVENLRVYQQSYVYMPAFSTKRGTDPVSLRVYYTLADFGTN-  
QTVLFANPNFLRVNGKFWKSRGIHAKRLSTGLFMVSAALSCEEVTIYGFWPFQMDLGG-  
RYISHHYDNLPLS-----GVHAMPEEFVQLWHLHKSGVLMQQLDQCKKDVSSQKPH--

#Anocar\_GT29\_ST8Sia1

-----GEKEIM--CGMRLQKCKAWQRGHAAHAFRKLKKECCDPGQLF-----  
-----AMTKENSPVGKNLWYDGEFLYS-FTIDNETFSLFP-----K-ATPFQ  
L----PLKKCSVVGNGGILKKSNCGRQIDQADFVMRCNLPPLTSEYSKDVGSKTQLVTAN  
PSI IKKRFQNL--WSRKAFVDSVKVYNQSYIYMPAFSMKAGTEPSLRVYYTLADV GAR-  
QTVIFANPNFLRDIGKFWKSGIHKRLSTGLFLVSAALGMCEEVTIYGFWPFMSMDLHG-  
NFISHHYDNLIPDS-----GFHAMPEEFVQLWFLHKSGVLRMQLEHCEDSIFHPAS---

#Galgal\_GT29\_ST8Sia1

-----DEKEIV--QGVLMQ--GKAWRRNHTAVAVFRKLLDCCDPGQLF-----  
-----AMTKQNSPMGKNLWYDGEFLYS-FTIDNTTYSLFP-----Q-ATPLQ  
L----PLKKCSVVGNGGILKKS GCGKQIDQADFVMRCNLPPLSREYSKDVGLKTQLVTAN  
PSI IQRFQNL--WSRKAFVDSVKVYNHSYIYMPAFSMKTGTGPSLRVYYTLKDFGAK-  
QAVLFANPNFLRDIGKFWKNGIHKRLSTGLFLVSAALGLCEEVTIYGFWPFVSDLHG-  
KFISHHYDNLVLPDS-----GFHAMPEEFVQLWFLHKSGVLRMQLEQCEDPLTQSSA---

#Bostau\_GT29\_ST8Sia1

-----DEKEIV--QGVLMQ--GTAWRRNRTAAGIFRKQMEDCCDPAHLF-----  
-----AMTKMNA PMGKSLWYDGEFLYS-FTIDNSTYSLFP-----Q-ATPFQ  
L----PLKKCAVVGNGGILKKS GCGRQIDEADFVMRCNLPPLSSEYTKDVGSKSHLVTAN  
PSI IRQRFQNL--WSRKT FVDHMKVYNHSYIYMPAFSMKTGTGTEPSLRVYYTLDSDVGAN-  
QTVLFANPNFLRSIGKFWKSRGIHAKRLSTGLFLVSAALGLCEEVAIYGFWPFVSNMHE-  
QPISHHYDNLVLPFS-----GFHAMPEEFVQLWFLHKGALRMQLDPCEDNSL-QPTS--

#Canlupfam\_GT29\_ST8Sia1

-----NEKEIV--QGVLMQ--GTAWRRNQTAAARVFRKQMEDCCDPAHLF-----  
-----AMTKLNSPMGKSMWYDGEFLYS-FTIDNSTYSLFP-----Q-ATPFQ

L----PLKKCAVVGNGGILKKSQCGRQIDEANFVMRCNLPPLSSEYTKDVGSKSHLVTAN  
PSIIRQRFQNL--WSRKTFFVNDMKIYNHSYIYMPAFSMKTGTPEPSLRVYYTLDVGVAN-  
QTVLFANPNFLRSIGKFWKSRGIHAKRLSTGLFLVSAALGLCEEVAIYGFWPFVSNMHE-  
QPISHHYDNLVLPFS-----GFHAMPEEFLQLWYLHKIGALRMQLDPCEDTSL-QPTS--

#Pantro\_GT29\_ST8Sia1

-----NEKEIV--QGVL-QQ-GTAWRRNQTAARAFRKQMEDCCDPAHLF-----  
-----AMTKMNSPMGKSMWYDGEFLYS-FTIDNSTYSLFP-----Q-ATPFQ  
L----PLKKCAVVGNGGILKKSQCGRQIDEANFVMRCNLPPLSSEYTKDVGSKSQLVTAN  
PSIIRQRFQNL--WSRKTFFVNDMKIYNHSYIYMPAFSMKTGTPEPSLRVYYTLDVGVAN-  
QTVLFANPNFLRSIGKFWKSRGIHAKRLSTGLFLVSAALGLCEEVAIYGFWPFVSNMHE-  
QPISHHYDNLVLPFS-----GFHAMPEEFLQLWYLHKIGALRMQLERCEDTSL-QPTS--

#Homsap\_GT29\_ST8Sia1

-----NEKEIV--QGVL-QQ-GTAWRRNQTAARAFRKQMEDCCDPAHLF-----  
-----AMTKMNSPMGKSMWYDGEFLYS-FTIDNSTYSLFP-----Q-ATPFQ  
L----PLKKCAVVGNGGILKKSQCGRQIDEANFVMRCNLPPLSSEYTKDVGSKSQLVTAN  
PSIIRQRFQNL--WSRKTFFVNDMKIYNHSYIYMPAFSMKTGTPEPSLRVYYTLDVGVAN-  
QTVLFANPNFLRSIGKFWKSRGIHAKRLSTGLFLVSAALGLCEEVAIYGFWPFVSNMHE-  
QPISHHYDNLVLPFS-----GFHAMPEEFLQLWYLHKIGALRMQLDPCEDTSL-QPTS--

#Macmul\_GT29\_ST8Sia1

-----NEKEIV--QGVL-QQ-GTAWRRNQTAARAFRKQMEDCCDPAHLF-----  
-----AMTKMNSPMGKSMWYDGEFLYS-FTIDNSTYSLFP-----Q-ATPFQ  
L----PLKKCAVVGNGGILKKSQCGRQIDEANFVMRCNLPPLSSEYTKDVGSKSHLVTAN  
PSIIRQRFQNL--WSRKTFFVNDMKIYNHSYIYMPAFSMKTGTPEPSLRVYYTLDVGVAN-  
QTVLFANPNFLRSIGKFWKSRGIHAKRLSTGLFLVSAALGLCEEVAIYGFWPFVSNMHE-  
QPISHHYDNLVLPFS-----GFHAMPEEFLQLWYLHKIGALRMQLDPCEDTSL-QPTS--

#Musmus\_GT29\_ST8Sia1

-----NEKEIV--QGVL-AQ-STAWRTNQTSASLFRQMEDCCDPAHLF-----  
-----AMTKMNSPMGKSLWYDGEFLYS-FTIDNSTYSLFP-----Q-ATPFQ  
L----PLKKCAVVGNGGILKMSQCGRQIDEANFVMRCNLPPLSSEYTRDVGSKTQLVTAN  
PSIIRQRFENLL--WSRKKFFVNDMKIYNHSYIYMPAFSMKTGTPEPSLRVYYTLKDVGAN-  
QTVLFANPNFLRNIGKFWKSRGIHAKRLSTGLFLVSAALGLCEEVSIYGSWPFVSNMQG-  
DPISHHYDNLVLPFT-----GYHAMPEEFLQLWYLHKIGALRMQLDPCEEP-SPQPTS--

#Ratnor\_GT29\_ST8Sia1

-----NEKEIV--QGVL-AQ-RTAWRRNQTSARLFRKQMEDCCNPAHLF-----  
-----AMTKVNSPMGKSLWYDGEFLYS-LTIDTSTYSLFP-----Q-ATPFQ  
L----PLKKCAVVGNGGILKMSQCGRQIDEANFVMRCNLPPLSSEYTRDVGSKTQLVTAN  
PSIIRQRFENLL--WSRKKFFVNDMKIYNHSYIYMPAFSMKTGTPEPSLRVYYTLKDAGAN-  
QTVLFANPNFLRNIGKFWKGRGIHAKRLSTGLFLVSAALGLCEEVSIYGFWPFVSNMQG-  
EPISHHYDNLVLPFS-----GFHAMPEEFLQLWYLHKMGALRMQLDPCENPPSPQPTS--

#Calmil\_GT29\_ST8Sia6

ASASNQWR-SEEDV---LRNIAKIHQCKWGKQKRAVENFRWELRKCCTRSLSGS-----  
-----FVTQRNTPVGTTELFYEAEPKKK-IKITPSIFAIFP-----K-DSPFR  
GR---SIQRCAVVGNGGILHNSSCGAEIDQADFVFRCNLPPMGGNFTKDVGSKTHLVTAN  
PKVIIERYAELH--KRRKPFANTLVIYNDALLLFPAFYHSKNTALSFRAYTLQDFKSK-  
QRVIFFNPIYLLKHLAHFWLSKGMQVQNLSTGITVASMAMELCSEVWIYGFWPFVSNMTEG-  
ELMSHHYFDSLLAEP-----DLHSTSNEFYQLLRMHSKGIVKLMQMGQCEAEETDEFTLKP

#Hetzeb\_GT29\_ST8Sia6

ASSPIQWK-TEKDV---IKSVAKLQKCQWHKQEVAAEELRSELKRCCHAAANY-----  
-----LVTQKNMPVGTTELIYDAESKNK-INITPQIFSIFP-----K-NSFFS  
GR---QYRRCAVIGNGGILANSSCGAEIDQADFVFRCNLPPMGGEFTRDIGTKTNLVTAN  
PSIILERYAKLQ--DRRRSFFTNLAVYDEALLLPAFYSKNTDLCFRALYTLQDFQAK-  
QKVVFNFVYLLKHLANFWLSKGIQVKRLSTGIMIVSVAVELCEEVWIYGFWPFVSNMVEG-  
KVVSHHYFDNLLPKP-----DTHSMPLFHHLLQMHSGMIKLMQMTQCQADPK-----

#Squaca\_GT29\_ST8Sia6  
-----EEEV---IKTVAQLQCCQWHKQELEAEKFRSELKRCCYAAAYDG-----  
-----LVTQRNTPVGTETLYDAEPKKK- IKITHPIFTIFP-----K-DSAFS  
SR---QYRRCAVIGNGGILANSSCGAEIDQADFVFRCLNPPVGGDFAQDVGKTNLVTAN  
PSIIAERYAELH--DRRKPFFTNTLVYNEALLLPAFSYTKNTVLCFRALYTLQDFQAK-  
QKVFFNPVYLKHLTEFWLSKGIQVNRSLSTGIMVVSVAIELCEEVWIYGFWPFGRNVEG-  
RVMSHHYFDNLLPKP-----DVHSMPSFEHQLLQMHSKGI IKLQTAQCQADPKEMGNI--

#Calmil\_GT29\_ST8Sia5  
TEVKVLSMVKQSEL---FERWRTLQLCKWELNKTEANT--ARLTNCCNAIQNF-----  
-----TVTQVNTALGANLTYDAQPKKQ-ITITEDI FNLLP-----Q-EMPYS  
RS---QFKKCAVVGNGGILKKECGKEINSADVFVFCNLPPLSNEYARDVGHRTQLVTAN  
PSIIKKRFQKLD--KWRPFFVELLQVYENTSVVMPAFYNTRNTDVS LRVRYALDDFSAP-  
QDLFYFHPRYLENVARFWGRQGVRAKRPSSGLMLVTAAMELCQEVHLYGFWGFPMDFPSG-  
IHITHHYYDNVKKPRP-----GFHSMPEIFFTFLMHMSRGVLQVHTTPCR-----

#Danrer\_GT29\_ST8Sia5  
TDVKVLT MVKTSSEL---FERWRNLQVCKWDQNKKEETDNFKMSLSRCCNAPSFL-----  
-----FTTKRNTPSGKTLRYEVDTSGI-LHISPEIFKMF-----D-DMPFS  
KS---QFKKCAVIGNGGI IKNSKCGREIDASDFVFRCLNPPVSDLYSQDVGSKTDLVTIN  
PSIITERFQKLE--KWRKPFYEV LQNYENSSVVLPAFYNTRNTDVSFRVKYMLDDFESS-  
RGVFFFHPQYLLNVQRFWAVQGVRAKRLSSGLMLVTAAMELCQEVHLYGFWAFPMNPSG-  
IFITHHYYDNVKKPRP-----GFHAMPEIFNFIMMHARGIVHVHTGPCR-----

#Gasacu\_GT29\_ST8Sia5  
MDVKVLT MVKTSDL---FERWRNLQVCRWEQNKKEETS NFKMSLTRCCNAPSFL-----  
-----FTTKRNTPAGTKLRYEVDTSGI-LPITTEVFKMF-----D-DMPYS  
KS---QYKKCAVVGNGGI IKSTKCGKEIDSADVFVFRCLNPLDNGYENDVGIKTDLVTAN  
PSILVCRFQKLE--KWRPFFYEV LQKYENSSVVLPAFYNTRNTDVSFRVKYMLDDFDSQ-  
RGVFFFHPQYLLNVQRFWAVQGVRAKRVSSGLMLVTAALEMCEEVHLYGFWAFPMNPSG-  
IYITHHYYDNVKKPRP-----GFHAMPEIFNFIMHTRGIVNVHTGQCT-----

#Orylat\_GT29\_ST8Sia5  
MDVKVLT MVKTSDL---FERWRNLQVCKWEQSKKEETS NFKLSLSRCCNAPSFL-----  
-----FTTKRNTPAGSKLRYEVDTSGI-LPITNEVFKMF-----H-DMPYS  
KS---QFKKCAVIGNGGI IKNSKCGKEIDSADVFVFRCLNPPIKEKYSTDVGSKTDLVTIN  
PSIITERFQKLE--KWRPFFYDVLQNYENSSVVLPAFYNTRNTDVSFRVKYMLDDFDSQ-  
RSVFFFHPQYLLNVQRFWAVQGVRAKRLSSGLMLVTAALEICEEVHLYGFWAFPMNPSG-  
VYITHHYYDNVKKPRP-----GFHAMPEIFNFIMHTRGI INVHTDQCM-----

#Takrub\_GT29\_ST8Sia5  
MDVKVLT MVKTSDL---FERWRNLQICRWEQNKKEETS NFKMSLSRCCNAPSFL-----  
-----FTTKRNTPAGTKLRYEVDTSGI-LPITAEVFKMF-----D-DMPYS  
KS---QFKKCAVVGNGGI IKNSKCGKEIDSADVFVFRCLNPPISEKYSADVGTKTDLVSI  
PSIITERFQKLE--KWRPFFYEV LQNYENSSAVLPAFYNTRNTDVSFRVKYMLDDFDSQ-  
RGVFFFHPQYLLNVQRFWAVQGVRAKRLSSGLMLVTAALEMCEEVHLYGFWAFPMNPSG-  
IFITHHYYDNVKKPRP-----GFHAMPEIFNFIMHTRGIVNVHTGQCT-----

#Tetnig\_GT29\_ST8Sia5  
MDVKVLT MVKTSDL---FERWRNLQVCKWEQNKKEETS NFKMSLSRCCNAPSFL-----  
-----FTTRRNTPAGTKLRYEVDTSGI-LPITAEIFKMF-----D-DMPYA  
KS---QFKKCAVVGNGGI IKNSKCGTEIDSADVFVFRCLNPPISEKYSADVGTKTDLVSI  
PSIITERFQKLE--KWRPFFYEV LQNYENSSVVLPAFYNTRNTDVSFRVKYMLDDFDSQ-  
RGVFFFHPQYLLNVQRFWAVQGVRAKRLSSGLMLVTAALEMCEEVHLYGFWAFPMNPSG-  
IFITHHYYDNVKKPRP-----GFHAMPEIFNFIMHTRGIVNVHTGRCV-----

#Siltro\_GT29\_ST8Sia5  
TNVKVLSMVKESDL---FDRWKS LQVCKWEMNVTEANAFKSALTRCCNAPSFL-----  
-----FTTQKNTPLGKTLRYEVDTSGI-FPISSEIFNIFP-----KQDMPYY  
RS---QFKKCAVVGNGGILKDSKCGKIDISTDFVFRCLNPPITPKYVEDVGMKTDVVTIN  
PSIITERFNKLE--KWRPFFYEV LQGYENASLLLPAFYNTRNTDVSIRVKYVLDDEFESQ-

QAVYYFHPQYLINVSRLFWMQGVHAKRISSGLILVTAALELCEEVHLYGFWGFPMDFSG-  
NFITHHYYDNVKKPRP-----GFHAMPSEIFNFIHMHSGILRVHTGTC-----

#Musmus\_GT29\_ST8Sia5

LEVKVLSMVKQSEL---FERWKS LQICKWAMGASEASLFKSTLSRCCNAPNFL-----  
-----FTTQKNTPVETNLRYEVESSGL-YHIDQEIFKMFP-----K-EMPHY  
RS---QFKKCAVVGNGGILKNSGCGKEINSADVFVRCNLPPISGIYTTDVGEKTDVVTVN  
PSIIIDRFHKLKLE--KWRPFFSVLQRYENASVLLPAFYNVRNTLVSRVKYMLDDFQSR-  
QPVYFFHPQYLSVSRYWLSLGVRRARISTGLSLVTAALELCEEVHLFGFWAFPMNPSG-  
FFITHHYYDNVKKPKP-----GFHAMPSEIFTFLRMHSGILRVHTGTCNCC-----

#Ratnor\_GT29\_ST8Sia5

LEVKVLSMVKQSEL---FERWKS LQICKWAMDASEASLFKSTLSRCCNAPNFL-----  
-----FTTQKNTPVETNLRYEVESSGL-YHIDQEIFKMFP-----K-EMPHY  
RS---QFKKCAVVGNGGILKNSGCGKEINSADVFVRCNLPPISGIYTTDVGEKTDVVTVN  
PSIIIDRFHKLKLE--KWRPFFSVLQRYENASVLLPAFYNVRNTLVSRVKYMLDDFQSG-  
EPVYFFHPHYLSSVSRYWLSLGVRRARISTGLILVTAALELCEEVHLFGFWAFPMNPSG-  
FFITHHYYDNVKKPKP-----GFHAMPSEIFTFLRMHSGILRVHTGTCNCC-----

#Anocar\_GT29\_ST8Sia5

TDVKVLSMVKQTEL---FERWKNLQ MCKWEMNITQANIFKATLLRCCNAPAF-----  
-----FTTQKNTPLGTKLKYEVDTSGI-FHVNQETFRMFP-----Q-EMPYS  
RS---QFKKCAVVGNGGILKNSRCGREIDSADVFVRCNLPPISEKYIADVGVKTDIVTVN  
PSIITERFHKLKLE--KWRKPFVNLQTYENASVLLPAFYNTRNTDVSIRVRYALDDFESQ-  
QSVYFFHPQYLINLSRYWLNQGVRAKRISTGLILVTAALELCEEVHLFGFWAFPMNPSG-  
IYITHHYYDNVKKPRP-----GFHAMPSEIFNFLHMHSGILRVHTDACNCC-----

#Galgal\_GT29\_ST8Sia5

LEVKVLSMVKQTEL---FDRWKS LQ MCKWEMNVTEANILKSTLSRCCNAPAF-----  
-----FTTQKNTPLGTKLKYEVDTSGI-FHINQEIFKMFP-----K-DMPYH  
RS---QFKKCAVVGNGGILKNSRCGREIDSADVFVRCNLPPISEKYLTDVGVKTDVVTVN  
PSIITERFHKLKLE--KWRKPFYDVLQVYENASVLLPAFYNTRNTDVSIRVKYVLDDFESQ-  
QAVYYFHPQYLINVSRYWLGQVRAKRISTGLILVTAALELCEEVHLFGFWAFPMNPSG-  
IFITHHYYDNVKKPRP-----GFHAMPSEIFNFLHMHSGILRVHTGTCGCC-----

#Bostau\_GT29\_ST8Sia5

LEVKVLSMVKQSEL---FDRWKS LQ MCKWAMNISEANQFKSTLYRCCNAPPFL-----  
-----FTTQKNTPLGTKLKYEVDTSGI-YHINQEIFRMFP-----K-DMPYH  
RS---QFKKCAVVGNGGILKNSRCGREINSADVFVRCNLPPISEKYTMDVGVKTDVVTVN  
PSIITERFHKLKLE--KWRPFFYRVLQVYENASVLLPAFYNTRNTDVSIRVKYVLDDFESP-  
QAVYYFHPQYLVNVSRYWLSLGVRAKRISTGLILATAALELCEEVHLFGFWAFPMNPSG-  
LYITHHYYDNVKKPRP-----GFHAMPSEIFNFLHLSRSGILRVHTGTCSCC-----

#Homsap\_GT29\_ST8Sia5

LEVKVLSMVKQSEL---FDRWKS LQ MCKWAMNISEANQFKSTLSRCCNAPAF-----  
-----FTTQKNTPLGTKLKYEVDTSGI-YHINQEIFRMFP-----K-DMPYH  
RS---QFKKCAVVGNGGILKNSRCGREINSADVFVRCNLPPISEKYTMDVGVKTDVVTVN  
PSIITERFHKLKLE--KWRPFFYRVLQVYENASVLLPAFYNTRNTDVSIRVKYVLDDFESP-  
QAVYYFHPQYLVNVSRYWLSLGVRAKRISTGLILVTAALELCEEVHLFGFWAFPMNPSG-  
LYITHHYYDNVKKPRP-----GGHAMPSEIFNFLHLSRSGILRVHTGTCSCC-----

#Pantro\_GT29\_ST8Sia5

LEVKVLSMVKQSEL---FDRWKS LQ MCKWAMNISEANQFKSTLSRCCNAPAF-----  
-----FTTQKNTPLGTKLKYEVDTSGI-YHINQEIFRMFP-----K-DMPYH  
RS---QFKKCAVVGNGGILKNSRCGREINSADVFVRCNLPPISEKYTMDVGVKTDVVTVN  
PSIITERFHKLKLE--KWRPFFYRVLQVYENASVLLPAFYNTRNTDVSIRVKYVLDDFESP-  
QAVYYFHPQYLVNVSRYWLSLGVRAKRISTGLILVTAALELCEEVHLFGFWAFPMNPSG-  
LYITHHYYDNVKKPRP-----GFHAMPSEIFNFLHLSRSGILRVHTGTCSCC-----

#Macmul\_GT29\_ST8Sia5

LEVKVLSMVKQSEL---FDRWKS LQ MCKWAMNISEANQFKSTLSRCCNAPAF-----



-----FTTQKNTPLGTKLKYEVDTSGI-YHINQEIFRMFP-----K-DMPYY  
RS---QFKKCAVVGNGGILKNSRCGREINSADVFVRCNLPPISEKYTMDVGVKTDVVTVN  
PSIIITERFHKLE--KWRPFPYRVLQVYENASVLLPAFYNTRNTDVSIRVKYVLDDEFESP-  
QAVYYFHPQYLVNVSRYWLSLGVRAKRISTGLILATAALELCEEVHLFGFWAFPMNPSG-  
LYITHHYYDNVKKPRP-----GFHAMPSEIFNFLHLHSRGILRVHTGTCCSC-----

#Ambmex\_GT29\_ST8Sia7

ATLSAHKKIGEKSI---MRNAELQRCPWQENREKKEFYRSEINQCCNSSHGL-----  
-----IVTQENTRVGENIVYETQKSVK-INVTTIEIFNMFP-----K-ESPF  
GK---AYKTCAVVGNGAILVDSCCGQQIDQAEFVFRFNLPLN--YTKDSGKKVDLVTAN  
PSIMINRFQSLN--HRRKAFVDMLRAYRGALILMPTFSHTFGTQLAFKVQYTLDDFGLG-  
SRMLSFHPVYLENLAKYWRKGLYVKRLSSGIMLVSAAMELCDSITLYGFWPFYSNLEG-  
RTIGYHYYDKMAPNI-----QVHAMPKEFLIYSQMHAQGALKLQVGQCS-----

#Ambmex\_GT29\_ST8Sia7-B

ATLSANKTINERSI---MRNAVELQRCPWLENRKKKEFYRSEINQCKTSHEL-----  
-----ILTQENTQVGEDIVYETQKSKK-INVTTKIFNMFP-----K-ESPF  
GK---AYKTCAVVGNGAILVDSCCGQQIDQAEFVFRFNLPLN--YTRDAGRVDLVTAN  
PSIMINRFQSLN--QRRKAFGNTLREYRGALILMAAFSHTRSTQVAFKVQYTLDDFGLG-  
SRMLSFHPVYLENLAKYWRKGLYVKRLSSGIMLVSAAMELCDSITLYGFWPFYSNLEG-  
RTIGYHYYDKMAPNI-----QVHAMPKEFLIYSQMHAQGALKLQVGQCS-----

#Latcha\_GT29\_ST8Sia7

TS-----QELPKETDLNKCSNLTQRL-----  
-----VLTRENAPIGHEIEYEVAE-QR-VRVEEPLFKLLPRFPPPFYQ-ESPFK  
KA---PYKRCAVVGNGAGILLNSGCGRRIDQADFVFRNLPPLN--YSKDVGSKTDLVTAN  
PSIIIQKYHGLK--ESRRLFVERMKVYKDALILMAAFSQSFATEISLAVAYALEDFGSK-  
QKAIFFFHPAYLRQLGSLWRSWVRRRLSSGLMLVSAALELCDSVALYGFWPFSTGLDG-  
EAVLHHYYDNVPEP-----GVHAMSEFVHYLQMHKGVQLHVGKC-----

#Rancat\_GT29\_ST8Sia7

LNSVLRIFKQQAFF---FKVVKTLOGCPWKEDQTERNLLQANLGKCCNASYSM-----  
-----IMTQENTVIGQTITFDAETKIK-QNITKSLYSLFP-----K-KSPFQ  
K----PIRTCAVVGNGGILTNSSCGAQIDGADFVFRNLPPLN--WTDDIGAKTDLVTSN  
PSILMNKFSSTL--EKRKPFIMMVQEYSSPLILLPAFSYSANTEVSLRVLYTIEDFELN-  
SKVFFFNPEYLNLSAYWKSMLKFGRLSSGLMVVSIAMEVCDKVTLYGFWPFKDLNG-  
VPILHHYYDNVPPKP-----GIHAMPDEFYKYLMHIQGSRLRLNLEHC-----

#Pelniq\_GT29\_ST8Sia7

LNSVMKIFRRKTF---FEVVKALQGPCWREDQTERNLLKAKFRKCCNASYSM-----  
-----MVTQENTPIGHIHYDGDGK-GR-KNVTESLYSLFP-----E-KSPFQ  
K----PIRSCAVVGNGGILNSSFCGAEIDRANFVFRNLPPLN--WTNDVGTKTDDVVTVN  
PSILIDKFGSLM--ERRKPFITRMKEYGSTLIILPAFSYLLNTAVSLRALYTIISDFNLN-  
SRAVFFNPDYLRNLTAYWKDMGIKSLRLSSGLMLVSAAIEMCDKVTLYGFWPFQDLDG-  
VPIPHHYYDNALPTP-----KIHSMPDEFYQFLQMHQGSRLRLNLGQC-----

#Strcamaus\_GT29\_ST8Sia7

TESFL-KRVDEVWS---LSHLKLMQSCRWNFNASALAQYRAELGHCCNASAWL-----  
-----ALTQVNTPLGSNIVYDGYRSKS-LKVSSGLLEILP-----E-ESPFQ  
EP---FYKTCAVVGNGGILRNSSCGSEIDEHQFVIRFNLPSMD--FPEDVGRKSSIVTVN  
PSILQKRFGHGLN--GRRLPFVKAAYIYGETWFLIIPAFSYPGQNEASYRALYALQDSGSR-  
SPIFFFHPQYLSALTRYWHEHGPHPTRLSSGFMLVNAALELCQHITLYGFWPFSLHPDG-  
HPLPHHYYDNQLPNP-----RMHLMPOEFACYVMNHFGVQLHVGKC-----

#Aptausman\_GT29\_ST8Sia7

TESFL-KRVNEVWS---LRHLKLMQSCRWNFNASALAQYRAELGHCCNASAWL-----  
-----VLTRVNTPLGKTIYDGDHDSKS-LKVSSGLLEILP-----E-ESPFQ  
DP---FYKTCAVVGNGGILLNSSCGSEIDGHQFVIRFNLPSMD--FPEDVGRKSSIVTVN  
PSILQERFHGLT--GRRLPFVKAAYIYGETWFLIIPAFSYPGQNEASYRALYALQDSGSR-  
SPVFFFHPQYLSALSRYWHERGFHTPRLSSGFMLVNAALELCQHITLYGFWPFSLHPDG-  
HPLPHHYYDNQLPKP-----RVHLMPOEFAYVVMNHFGVQLHHLHGKC-----

#Cuccancan\_GT29\_ST8Sia7

-----QLGHYCNASAWL-----  
-----AVTQENTPLGSNIVFDGYRSKS-LKVSSGLLEILP-----E-KSPFQ  
DL---LYKTCAVVGNNGGILRNSSCGSQIDGYQFVIRFNLPSAD--FPEDVGRKSSIVTVN  
PSILHKRFHGLN--GRRLPFVEAAAASYGKTWFFI PAFSYPGNSEASYRAFYALQDSESQ-  
SHVFFFHPQYLSALSKEYWHDGRGFHTYRLSSGFMLVNAALELCEHITLYGFWPFSLHPDG-  
HALPHHYYDNVLPNQ-----RIHIMPREFAYYVDMHFQGVLRRLHVGRC-----

#Colliv\_GT29\_ST8Sia7

TQP-----QKAELGRCCNASAWL-----  
-----AVTQDNTPLGSEIVYDAYPSKR-LKVSSGLLEILP-----E-KSPFQ  
ES---PYKTCAVVGNNGGILRNSSCGSKIDGHEFVIRFNLPSVD--FPEDVGKSSIVTVN  
PSILHKRFHGLN--GRRLPFVAAAASYGKTWFLI PAFSYPNSSEASYRALYALQDSASQ-  
SHIFFFFHPQYLSLSSKYWHDHGFHTPRLSSGFMLVNAALELCQHITLYGFWPFSLHPDG-  
HSLPHHYYDNVLPNS-----RIHIMPKEFTYYVDMHFHGVQLHLGR-----

#Apavit\_GT29\_ST8Sia7

TQP-----HKAELGHCCNASAWL-----  
-----AVTQENAPLGSEIVYDGYPSKR-LKVSSGLLEILP-----E-KSPFQ  
NP---LYKTCAVVGNNGGILRNSSCGAKIDEHQFVIRFNLPSMD--FPEDVGRKSSIVTVN  
PSILQKRFHGLN--GRRLPFVAAAAPYGKTWFLI PSFSFPDDTEASYRALYALQDSASE-  
SHVFFFHPHYLSALSKEYWHDLGFHTYRLSSGFMLVNAALELCQHITLYGFWPFSLHPDG-  
HSLPHHYYDNVLPKQ-----NIHIMPKEFSYYVDMHFHGVQLHLGR-----

#Chrpicbel\_GT29\_ST8Sia7

SQRVLPVRLHEAWIWR---LKLMOQSCPWAYNARALGRYREQLGHCNASADL-----  
-----VLTRDNTPLGSRIVCDGQPAKK-LLVQEALLEILP-----Q-G-----  
-A---PYDSCAVVGNNGGILHNSGCGPEIDRAQFVIRFNLPPMG--FAEDVGTKSSVITVN  
PSILVLRFGALS--RWRPFAEAMGTYGAPLLLI PAFSFSFAAVSSQALYTLDFGSP-  
ARAVFMNPEYLAGLDGHWHRRLRAKRLSSGFMLVNAALELCQHITLYGFWPFPTDPEG-  
RPLPYHYYDKQTPKP-----GVHAMPDEFTRYLGMHLQGALRLHLGRQEGLAGGHAQQG

#Malterter\_GT29\_ST8Sia7

SPI--P-----EALVMGAEQCRGLM--QNWSA---GTL PAREQLGSSCNASANL-----  
-----VLTQNTQLGSQIVYDAQRDKK-HPVKEELLEMLP-----Q-GSPFQ  
GA---PYECCAVVGNNGGILRNSSCGSEIDRAQFVIRFNLPPMD--FADDVGTKSSVVTMN  
PSILHARFRGLS--RWRPFAEAVGIYGAPLLLI PAFS FVQSTV SFQALYTLDFGSP-  
ARAVFMNPEYLARLDGHWPRGLRAKRLSSGFMLVSAALELCQHITLYGFWPFPTDPEG-  
RLLPHHYYDNQPPKP-----GIHAMPDEFTRYLGMHMQGALRLHLGRQ-----

#Promuc\_GT29\_ST8Sia7

-----QLMLIQECPWKPNATAVMQHRAELGQCCNASHRL-----  
-----VVTKENAPLGSTIHFDGVKVKI-ITVDSKLTNMLL-----E-RFPLA  
DA---QYSKCALIGNGGILQDSRCGQEIDQADFI IRFNLPPLN--RTEDVGTKTHLVTIN  
PSVLTNRFKNLV--GPPMAFIDAVRAYPNALFLI PALS FHDHIELGYRALHILKDIGLP-  
HQAFFLNPHYLGALDMYWKQKGMTEIRLSTGFMFTSFALEFCDHITLYGFWPFDFDLTG-  
KPISSHYYDNVLPNA-----FVHSMSEEFSTRYIDMYAQGVLR IQLGKCQ-----

#Deiacu\_GT29\_ST8Sia7

VI-----ILLPAPLN----GVLLKSSKWTPTSANLFCSRAL--DCCVCGFHLGFSLSCF  
SFEDSKTWCVLR CATGERTAGIHPPFDGVKVKI-ITVDSKLTNMLL-----E-RFPLA  
DA---QYSKCALIGNGGILQDSRCGQEIDQADFI IRFNLPPLN--RTEDVGTKTHLVTIN  
PSILTNRFKSLV--RSPVAFIDAVRAYPNALFLI PALS FHDHIELGYRALHILKDIGLP-  
HQAFFLNPHYLGALDTYWKQKGMTEIRLSTGFMFTSFALEFCDHITLYGFWPFDFDLTG-  
KPINHHYYDNVLPHP-----FVHSMSEEFSTRYIDMYAQGVLR IQLGKC-----

#Pytmol\_GT29\_ST8Sia7

VI-----ILLPAPLN----GVLLKSSKWTPTSANLFCSRAL--DCCVCGFHLGFSLSCF  
SFEDSKTWCVLR CATGERTAGIHPPFDGVKVKI-ITVDSKLTNMLL-----E-RSPLA  
GF---QYNKCALIGNGGILRHSSCGQEIDQADLI IRFNLPPMN--YTEDVGTKTSLVITIN

PSILNNKFQSLQ--GPQKPFLLDALQAYRDALFLIPSLSFSSHVLCRAVSIKDSGLT-  
HRAFFLHPHYLGAIKRYWEQKGLKEIRLSTGFLFISIALEFCEHITLYGFWPFYSYDLTG-  
EPLSHHYDNLIPNA-----GFHTMSEEFLLHYLNMYAQGVLRILQLGKC-----

#Anocar\_GT29\_ST8Sia7-A

-----TQLQCCNASFRF-----  
-----VTTKENIRLGSYIIFDGNPTRK-LRVDTKLLDLLP-----E-KSPFM  
DT---SYRKCAVVGNGGILLNSSCGQEIDRADLVIRFNLPPMN--FSEDIGTKTSLVTIN  
PSILQNRFKLLQ--ERRKPFVEALHSYSDATFLLPVLSFVGHNILGYRVLYTLEDFGVE-  
QQAFFLNPOYLSNLANFWKKRGLKTNRLSSGFMLVSMALFECQHITLYGFWPFYSYDLNN-  
QSIPIHHYYDNMMPTP-----GVHAMPTTEFSYYLSMYAEGVLRRLRVGKCQ-----

#Gekjap\_GT29\_ST8Sia7

LQ-----KLDEEILA----HLLLTQGCWPQASARAMAQYRTELGRCCNASFWL-----  
-----AITKENTPLGSDILLDGNKGGK-LPVGAELMDLLP-----E-RSPIP  
GI---LYDQCAVVGNGGILQNSSCGQEIDQADLIIRFNLPPMN--YSEDVGTKTSLVITIN  
PSILQTKFNKLE--AHRKPFADALRPYRSALVFIPAFSFGVHSELAYRALYTMEDFGTG-  
QRAYFWNPHYLDTLGIYWKARGFYPHRLSSGFMLVNMALFECRITLYGFWPFSDHPAG-  
RPIPHHYDNTWPKP-----GVHAMSQEFSHYLMHYAQGVLLQLRLGSCQ-----

#Amblat\_GT29\_ST8Sia6

LSATL-RKRYSEDFY--IQSFRKVQNTWTRRPEEYKFRSKLASCCNAVNNF-----  
-----IVSQNNTSLGSNMSYEVDNKKK-IVISSETIFKMLP-----Q-SQPFV  
ER---SYKHCAVVGNGGILQNSSCGAEIDESDFVFRCNLPPVNGDFHKDVGNKTNVVTVN  
PSIIALRYGKLS--QKKTVFLQNTIKYGDAYFLLPAFSYRSNTAVCFKVFALKEAKAN-  
QKAIFFHPKYLKNLGQFWRANGVRAYRLSTGLMIASAAIELCDHVKLYGFWPFSSKNTEG-  
NLISSHYYDNQLPKP-----GFHAMPKEFIQYLLQLHNGKILKLQVGECEENKTKI-----

#Ambmex\_GT29\_ST8Sia6

LSATL-RKRYSEDFY--IQSFRKVQNTWTRRPEEYKFRSKLASCCNAVNNF-----  
-----IVSQNNTSLGSNMSYEVDTKKN-IVISSETIFKMLP-----Q-SQPFV  
ER---SYKHCAVVGNGGILQNSSCGAEIDESDFVFRCNLPPVNGDFHKDVGNKTNVVTVN  
PSIIALRYGKLS--QKKTVFLQNTIKYGDAYFLLPAFSYRSNTAVCFKVFALKEAKAN-  
QKAIFFHPKYLKNLGQFWRANGVRAYRLSTGLMIASAAIELCDHVKLYGFWPFSSKNTEG-  
NLISSHYYDNQLPKP-----GFHAMPKEFIQYLLQLHNGKILKLQVGECEENKTKI-----

#Siltro\_GT29\_ST8Sia6

LTVSL-KKRYSEDYY--IQTVDNLQNTWHRPEERSKFRLDLSSCCNGVKNF-----  
-----IVSQNNTSVGINITYEVESKKR-ILITEEIIYRMLP-----K-SQPFV  
GT---PFKQCAVVGNGGILANSKCGVEIDQSDVFRCNLPPTSGNVSDVGNKTNLVTVN  
PSIISQKYRKLN--KVKNVFLKYVSNYGNLSSLLLPAFSYSSNTAISFEVHRVLEKNQAK-  
QKAVFFHPNYLKNLAKFWKGGVRAVRLSTGLMITSAAMELCEEVILYGFWPFSSKDLEG-  
KPISSHYYDNMLPKP-----GFHAMPKEFYQVLLQLHNGKILKLQVGECEENKTKI-----

#Xenlae\_GT29\_ST8Sia6

LTVSL-KKRYSEDYY--IQTVDNLQNTWQKRPQEYSKFRLYLSTCCNGLKNF-----  
-----IVSQNNTSLGSNITYEVESKKK-ILIAEEIYRMFP-----K-SQPFV  
GA---PFKQCAVVGNGGILANSKCGAEIDQSDVFRCNLPPTWGNI SVDVGNKTNLVTVN  
PSIISRKYRKLN--KVKNVFLKNSNYGYSFLLLPAFSYSSNTAISFEVHRILEKNQAK-  
QKAIFFHPYYLKNLAQFWKGRGVRAVRLSTGLMITSAAMELCEEVILYGFWPFSSKNQEG-  
KPISSHYYDNILPKP-----GFHAMPKEFYQVLLQLHNGKILKLQVGECEENKTKI-----

#Litcat\_GT29\_ST8Sia6

LSVSL-RKRYSEDYY--IQAVNDVQNTWKKKQPQEYSRFRLYLSSCCNAVNNF-----  
-----IVSQNNTSLGSNITYEVESKKK-ILIAEDIYKMLP-----K-SQPFV  
GI---PFKQCAVVGNGGILKNSCGAEIDQSDVFRCNLPPIWGNVSDVGNKTDLVTVN  
PSIIALKYGKLN--DMKTAFLKNTNYGYSFLLLPAFSYSSNTAISFEVHLLRKYQAK-  
QKAIFFHPNYLKSQAQFWKGRGVRAVRLSTGFMITSAAMELCEEVILYGFWPFSSKNLDG-  
KPISSHYYDNQLPKP-----GFHAMPKEFYQVLLQLHNGKILKLQVGECEENKTKI-----

#Rhimar\_GT29\_ST8Sia6

LTVSL-RKRYSEDCY--IQAVNEVQNCWTQKKPQEYSRFRFYLSGCCNAVNNF-----  
-----IVSQNNTSLGNSITYEVESKKN-ILIAEDIYKMLP-----K-SQPFE  
GI---PFKQCAVVGNGGILTNSSCGAEIDRSDFVFRCLNPPIWGNAAVDVGKNTDLVTVN  
PSIIALKYGKLN--EMKTAFLRNLTSYGGSFLLLPAFSNTAISFEVHNLKLYQAK-  
QRAIFFHPNYLKSALQFWRGRGVRAYRLSTGFMITSAAIELCEDVKLYGFWPFSKNPNG-  
KPISSHYYDNQLPKP-----GFHAMPKEFYQVLQLHYKGVLLKQIGECQKR-----

#Latcha\_GT29\_ST8Sia6

MSATTPRKRYSDDY--IQTVNELQKCSWVIRPEEHEKFRSELSVCCNAVRNF-----  
-----IVSQNNTPLGTNMSYEVENGRT-FLITQRIFKMFP-----Q-SQPFA  
GY---PYNQCAVVGNGGILKNSACGTEIDQADFVFRCLNPPTLGNISIDVGSKTSLVTLN  
PSIITHRFGKLN--EKRKPFVETVSHYGEAFLLLPAFSFRSNTALSFKVYHTLEAFRGK-  
QKTIFFFHPKYLKSLALFWRSKGIKVYRLSSGFMIANAIIELCKEVRLYGFWPFSKNNEG-  
KNISHHYYDNQLPKP-----GIHSMPEFYHFLKLHNKGI IKLQFGRCDIT-----

#Latmen\_GT29\_ST8Sia6

MSATTPRKRYSDDY--IQTVNELQKCSWVIRPEEHEKFRSELSVCCNAVRNF-----  
-----IVSQNNTPLGTNMSYEVENGRT-FLITQRIFKMFP-----Q-SQPFA  
GY---PYNQCAVVGNGGILKNSACGTEIDQADFVFRCLNPPTLGNISIDVGSKTSLVTLN  
PSIITHRFGKLN--EKRKPFVETVSHYGEAFLLLPAFSFRSNTALSFKVYHTLEAFRGK-  
QKTIFFFHPKYLKSLALFWRSKGIKVYRLSSGFMIANAARRLCKEVRLYGFWPFSKNNEG-  
KNISHHYYDNQLPKP-----GIHSMPEFYHFLKLHNKGI IKLQFGRCDIT-----

#Canlupfam\_GT29\_ST8Sia6

QRLYSKAKNYLES DY--LQIIRNIQNC PWKRQEEYENFRAKLASCCDAAQNF-----  
-----IVSQNNTPAGTNMSYEVESKNE-ILIRENIFNMFP-----V-SQPFV  
EY---PYNQCAVVGNGGILNKSLCGAEIDKSDFVFRCLNPPITGNISKDVGSKTNVTVN  
PSIIRLKYGNLK--KKKEIFLEDIATYGD AFLLLPAFSFRANTIASFKVYSTLKE SNAR-  
QKVIFFHPKYLRLALFWRTGVT EFR LSSGLMITSVAVELCEHVKLYGFWPFSRTVKD-  
TPVSHHYYDNMLPKR-----GFHEMPKEYRQILQLHLKGI LKLFQSKCEIA-----

#Musmus\_GT29\_ST8Sia6

NSLSNKTRRYSEDDY--LQITITNIQRCPWNRQAEYDNFRAKLASCCDAIQDF-----  
-----VVSQNNTPVGTNMSYEVESKKN-IPIRENIFHMFP-----V-SQPFV  
DY---PYNQCAVVGNGGILNKSLCGAEIDKSDFVFRCLNPPITGSASKDVGSKTNLVTVN  
PSIITLKYQNLK--EKKAQFLEDISTYGD AFLLLPAFSYRANTGISFKVYQTLKESKMR-  
QKVLFFHPRYLRHLALFWRTKGVTAYRLSTGLMIASVAVELCENVKLYGFWPFSKTIED-  
TPLSHHYYDNMLPKH-----GFHQMPKEYSQMLQLHMRGILKLFQSKCETA-----

#Ratnor\_GT29\_ST8Sia6

DSLANKTRRYSEDDY--LQIVTNIQRCPWNRQAEYENFRAKLASCCDAIQDF-----  
-----VVSQNNTPVGSNMTYEVESKQ-IPIRENIFHMFP-----V-SQPFV  
DY---PYNQCAVVGNGGILNKSLCGAEIDKSDFVFRCLNPPITGSASQDVGSKTNLVTVN  
PSIITLKYKNLK--EKKARFLEDISAYGD AFLLLPAFSYRVNTGISFKVYQTLKESKVR-  
QKVLFFHPRYLRHLALFWRTKGVTAYRLSTGLMIASIAVELCENVTLYGFWPF SKTVEE-  
IPLSHHYYDNKLPKH-----GFHQMPKEYSQMLQLHMKGILKLFQSKCEAA-----

#Macmul\_GT29\_ST8Sia6

ESFSNNTKGYSENDY--LQIITDIQSCPWKRQAEYANFRAKLASCCDAVQNF-----  
-----VVSQNNTPVGTNMSYEVESKKN-IPIKKNIFHMFP-----V-SQPFV  
EY---PYNQCAVVGNGGILNKSLCGAEIDKSDFVFRCLNPPITGDVSKDVGSKTNLVTVN  
PSIITLKYGNLK--EKRALFLEDIATYGD AFFLLPAFSFRANTGTSFKVYYTLEESKAR-  
QKVLFFHPKYLKHLALFWRTKGVTAYRLSTGLMITSVAVELCENVKLYGFWPFSKTVED-  
IPVSHHYYDNKLPKH-----GFHQMPKEYSQILQLHMKGILKLFQSKCEVA-----

#Ponpyg\_GT29\_ST8Sia6

ESFSNNTKGYSENDY--LQIITDIQSCPWKRQAEYANFRAKLASCCDAVQNF-----  
-----VVSQNNTPVGTNMSYEVESKKE-IPIKKNIFHMFP-----V-SQPFV  
EY---PYNQCAVVGNGGILNKSLCGTEIDKSDFVFRCLNPPITGDVSKDVGSKTNLVTVN  
PSIITLKYGNLK--EKKALFLEDIATYGD AFFLLPAFSFRANTGTSFKVYYTLEESKAR-  
QKVLFFHPKYLKDLALFWRTKGVTAYRLSTGLMITSVAVELCKNVKLYGFWPFSKTVED-

TPVSHHHYDNKLPKR-----GFHQMPKEYSQILQLHMKGILKLOFSKCEVA-----

#Homsap\_GT29\_ST8Sia6

ESFSNKTKRYSENDY--LQIITDIQSCPWKRQAEYANFRAKLASCCDAVQNF-----  
-----VVSQNNTPVGTNMSYEVEESKKE-IPIKKNIFHMF-----V-SQPFV  
DY---PYNQCAVVGNGGILNKSCLGTEIDKSDVFVRCNLPPTTGVDVSKDVGSKTNLVTIN  
PSIITLKYGNLK--EKKALFLEDIATYGDFAFFLLPAFSFRANTGTSFKVYYTLEESKAR-  
QKVLFFHPKYLKDLALFWRTKGVTAAYRLSTGLIMITSVAVELCKNVKLYGFWPFPSKTVED-  
IPVSHHHYDNKLPKH-----GFHQMPKEYSQILQLHMKGILKLOFSKCEVA-----

#Pantro\_GT29\_ST8Sia6

ESFSNKTKGYSENDY--LQIITDIQSCPWKRQAEYANFRAKLASCCDAVQNF-----  
-----VVSQNNTPVGTNMSYEVEESKKE-IPIKKNIFHMF-----V-SQPFV  
DY---PYNQCAVVGNGGILNKSCLGTEIDKSDVFVRCNLPPTTGVDVSKDVGSKTNLVTIN  
PSIITLKYGNLK--EKKALFLEDIATYGEAFAFFLLPAFSFRANTGTSFKVYYTLEESKAR-  
QKVLFFHPKYLKDLALFWRTKGVTAAYRLSTGLIMITSVAVELCKNVKLYGFWPFPSKTVED-  
IPVSHHHYDNKLPKH-----GFHQMPKEYSQILQLHMKGILKLOFSKCEVA-----

#Bostau\_GT29\_ST8Sia6

ETLSNRTKGYSEDEY--LQIITNIQSCPWKRQVEEYENFRAKLASCCDAVQNF-----  
-----IVSQNNTPIGTNMTYEVEESKSK-IQIKENIFDMLE-----V-VQPFV  
GY---SFNQCAVVGNGGILNQSLCGAEIDKADFVRCNLPPTTGNTNDVGTNLTNLVTIN  
PSIIKLRYGNLK--EKKAI FLEDVAAYGDFAVLLPAFSFRANTAASFVYYTLKESKAR-  
QKVLFFHPKYLKDLALFWRTKGVTEYRLSSGLIMITSVAVELCENVKLYGFWPFPSRTGEN-  
MPVSHHHYDNKLPKR-----GFHEMPKEYSQILQLHVKGILKLOFSKCETA-----

#Susscr\_GT29\_ST8Sia6

KALSNTKRYSEDDY--LQIITNIQSCPWKRQAEAYENFRAKLASCCDAVQNF-----  
-----IVSQNNTPVGTNMSYEVEESKSE-IQIRESIFDMLE-----V-FQPFV  
GY---PYNQCAVVGNGGILNQSLCGAEIDKSDVFVRCNLPPTTGNISNDVGSKTNLVTIN  
PSIIRLRYGNLK--EKKAVFLEDIATYGDFAVLLPAFSFRANTAASFVYYALKESNSR-  
QKVLFFHPKYLKHLAVFWRTKGVTEYRLSSGLMIASVAVELCENVKLYGFWPFPSKTGEN-  
TPVSHHHYDNKLPKR-----GFHEMPKEYRQILQLHVKGILKLOFSKCDTS-----

#Gekjap\_GT29\_ST8Sia6

WAASVKKRYAEDY--LQVVGRLQONCTWKNRPQYAKFKSELASCCDAAHNF-----  
-----ITSQNNTPLGSNMSYEVDNKKT-IHITEEIFRMLP-----E-SQPL-  
EQ---PFKNCAVVGNGGILKNSNCGAEIDQSDVFVRCNLPPTMGSIQDVGSKTNLVTIN  
PSIISQKYNKLN--EKKATFLENIASYGDFTLLLPFAFSFRSNTAASFVHHTLKEFSKAK-  
QKAIFFYPYRLNLAQFWRTKGVKAYRLSSGFMITSAALEL CENVKLYGFWPFPSKNVAG-  
TPISHHHYDNQLPKP-----GFHAMPKEYNQILQLHGRGILKLOFGKCLPD-----

#Anocar\_GT29\_ST8Sia6

WSSSIKTKRYSEDDY--LQIVGKLQONCTWKKRPQYAKFRSELTSCCDAIHNF-----  
-----ISSQNNTPLGSNMSYEVDNKKT-IHITEEIFKMLP-----E-SQPL-  
DY---PFKQCAVVGNGGILKNSNCGAEIDKSDVFVRCNLPPTGSGSVQDVGNKTNLVTIN  
PSIIAQKYNKLN--EKKATFLENIASYGDFAFLLLPAFSFRSNTATSFKVHHTLREFSAK-  
QKAIFFYPYRLKLAQFWRTKGVKAYRLSSGFMITSAAVELCENVKLYGFWPFPSKSIAG-  
NPISHHHYDNQLPKP-----GFHAMPKEYNQILQLHGRGILKLOFGKCHTE-----

#Tingut\_GT29\_ST8Sia6

LSSLTKKKRYSEDDF--LHLVTKLQONCTWVKRPEECTKFRSELASCCDAVHNF-----  
-----VASQNNTPLGSNMSYEVEESKKT-ILITENIFRMLP-----V-SSPFS  
AY---PFKNCAVVGNGGILKNSSCGAEIDRADVFVRCNLPPTTGSMKDVGNKTNLVTIN  
PSIIAQKYNKLN--KKKTEFLQNI AVYGDFAFLLLPAFSYRSNTATSFKVYQTLKEFKAM-  
QRAIFFHPTYLKSLAQFWRTKGVKAYRLSSGFMITSAAIELCENVKIYGFWPFPSKSTEK-  
MPISHHHYDNQLPKP-----GFHAMPKEYNQILQLHGKGILKLOFGKCESE-----

#Chemyd\_GT29\_ST8Sia6

WSSSIKTKRYSEDDY--LQIVTKIQONCTWKKRPEEYTKFRLELASCCDAVHNF-----  
-----IASQNNTALGSNMSYEVDNKKT-LLITEDI FRMLP-----E-SPPLL

DY---PFKHCAVVGNGGILKNSSCGAEIDKSDFVFRCLNPPTTGSVSKDVGNGKTNLVTVN  
PSIIAQKYNKLN--EKKVTFLENIASYGNAFLLLPAFSFKSNTAASFVKVYHTLQEFRAK-  
QRAIFFHPRYLKSLAQFWRTKGVKAYRLSSGFMIASAAIELCENVKLYGFWPFPSKTTEE-  
MPISHHYYDNQLPKP-----GFHAMPKEYNQILQLHGKGIVKLQFGKCDSDXKGTSDSSK

#Chrpicbel\_GT29\_ST8Sia6

WSSSIKKKRYSEDYY--LQIVTKIQNCTWKRPEEYTKFRLELASCCDAVHNF-----  
-----IASQNNTLLGSNMSYEVDNKKT-ILITEDI FRMLP-----E-SPPFL  
GY---PFKHCAVVGNGGVLKNSSCGAEIDNSDFVFRCLNPPTTGSVSKDVGNGKTNLVTVN  
PSIIAQKYNKLN--EKKVTFLENIASYGNAFLLLPAFSFKSNTAASFVKVYHTLQEFRAK-  
QRAIFFHPRYLKSLAQFWRTKGVKAYRLSSGFMIASAAIELCENVKLYGFWPFPSKTTEE-  
MPISHHYYDNQLPKP-----GFHAMPKEYNQILQLHGKGILKLQFGKCDSD-----

#Galgal\_GT29\_ST8Sia6

LSSSFKKKRYPEDYY--LHIVKKLQNCTWVRRPEESAKFRSELASCCNAVHNF-----  
-----IASQNNTPLGSNMSYEVDNKKT-ILITEDI FRMLP-----V-SSPLS  
VY---PFKNCAVVGNGGILKNSSCGAEIDRSDFVFRCLNPPTMGSIKDVGNKTKLVTVN  
PSIIAQKYNKLN--EKKTEFVENVAVYGD AFLLLPAFSFRSNTATSFKVYHTLQEFKAT-  
QRAIFFHPTYLKSLAQFWRTKGVKAYRLSSGFMITSAAVELCENVKLYGFWPFPSKSTEK-  
MPISHHYYDNQLPKP-----GFHAMPKEYNQILQLHGKGIKKLQFGKCESD-----

#Chavoc\_GT29\_ST8Sia6

LSSSIKKKRYSEDYY--LHIVTKLQNCTWTRRPEESTKFRSELASCCDAVHNF-----  
-----IASQNNTPLGSNMSYEVDNKKT-ILITEDI FKMLP-----V-SSPLS  
AY---PFKTCVAVVGNGGILKNSSCGAEIDRSDFVFRCLNPPTTGSISKDVGNKTNLVTVN  
PSIIAQKYNKLN--EKKTEFLENI AVYGD AFLLLPAFSFRSNTATSFKVYHTLQEFKAT-  
QRAIFFHPTYLKSLAQFWRTKGVKAYRLSSGFMITSAALELCENVKLYGFWPFPSKSTEK-  
MPISHHYYDNQLPKP-----GFHAMPKEYNQILQLHGKGILKLQFGKCESD-----

#Egrgar\_GT29\_ST8Sia6

LSSSIKKKRYSEDYY--LHIVTKLQNCTWIRRPEESMKFRSELASCCDAVHNF-----  
-----IASQNNTPLGSNMSYEVDNKKT-ILITEDI FKMLP-----V-SSPLS  
VY---PFKTCVAVVGNGGILKNSSCGAEIDRSDFVFRCLNPPTTGSISKDVGNKTNLVTVN  
PSIIAQKYNKLN--EKKTEFLEDVAVYGD AFLLLPAFSFRSNTATSFKVYHTLKEFRAS-  
QRAIFFHPTYLKSLAQFWRTKGVKAYRLSSGFMITSAALELCENVKLYGFWPFPSKSTEK-  
MPISHHYYDNQLPKP-----GFHAMPKEYNQILQLHGKGILKLQFGKCESD-----

#Calpug\_GT29\_ST8Sia6

LSSSIKKKRYSEDYY--LHIVTKLQNCTWIRRPEESTKFRSELASCCDAVHNF-----  
-----IASQNNTPLGSNMSYEVDNKKT-VLITEDI FKMLP-----V-SSPLS  
VY---PFKTCVAVVGNGGILKNSSCGAEIDRSDFVFRCLNPPTTGSISKDVGNKTNLVTVN  
PSIIAQKYNKLN--EKKTEFLDNIAVYGD AFLLLPAFSFRSNTATSFKVYHTLQEFKAT-  
QRAIFFHPTYLKSLAQFWRTKGVKAYRLSSGFMITSAALELCENVKLYGFWPFPSKSTEK-  
MPISHHYYDNQLPKP-----GFHAMPKEYNQILQLHSGKILKVQFGKCESD-----

#Psehum\_GT29\_ST8Sia6

LSSSIKKKRYSEDYY--LHIVTKLQNCTWIRKPEESTKFRSELASCCDAVHNF-----  
-----IASQNNSPLGSNMSYEVDNKKT-ILITEDI FKMLP-----V-SSPLS  
VY---PFKNCAVVGNGGILKNSSCGAEIDSSDFVFRCLNPPTTGNISKDVGNKTNLVTVN  
PSIIAQKYNKLN--EKKTEFLENI AAYGD AFLLLPAFSFRSNTATSFKVYHTLKEFKAT-  
QRAIFFHPSYLKSLAQFWRTKGVKAYRLSSGFMITSAALELCENVKLYGFWPFPSKSI EK-  
MPISHHYYDNQLPKP-----GFHAMPKEYNQILQLHGKGVLKLQFGKCESD-----

#Parmaj\_GT29\_ST8Sia6

LSSSIKKKRYSEDYY--LHIVTKLQNCTWIRKPEESTKFRSELASCCDAVHNF-----  
-----IASQNNSPLGSNMSYEVDNKKT-ILITEDI FKMLP-----V-SSPLS  
VY---PFKNCAVVGNGGILKNSSCGAEIDSSDFVFRCLNPPTTGNISKDVGNKTNLVTVN  
PSIIAQKYNKLN--EKKTEFLENI AAYGD AFLLLPAFSFRSNTATSFKVYHTLKEFKAT-  
QRAIFFHPAYLKSLAQFWRTKGVKAYRLSSGFMITSAALELCENVKLYGFWPFPSKSI EK-  
MPISHHYYDNQLPKP-----GFHAMPKEYNQILQLHGKGILKLQFGKCESD-----

#Lepcor\_GT29\_ST8Sia6-B

LSSSIKKKRYSEDYY--LHIVTKLQONCTWIRRPEESTKFRSELASCCDAVHNF-----  
-----IASQNNNSPLGSNMSYEVDSKKT-ILITEDI FKMLP-----V-SSPLS  
VY---PFKTCAVVGNGGILKNSSCGAEIDSSDFVFRCNLPPTTGSISKDVGNKTNLVTVN  
PSIIAQKYNKLN--EKKTEFLENI AVYGD AFLLLP AFSFRSNTATSFKVYHTLKEFKAT-  
QRAIFFHPAYLKSLAQFWRTKGVKAYRLSSGFMITSAALELCENVKLYGFWPFSKSTEK-  
MPISHHYYDNQLPKP-----GFHAMPKEYNQILQLHGKGILKLQFGKCESD-----

#Lepcor\_GT29\_ST8Sia6-A

LSSSIKKKRYSEDYY--LHIVTKLQONCTWIRRPEESTKFRSELASCCDAVHNF-----  
-----IASQNNNSPLGSNMSYEVDSKKT-ILITEDI FKMLP-----V-SSPLS  
VY---PFKTCAVVGNGGILKNSSCGAEIDSSDFVFRCNLPPTTGSISKDVGNKTNLVTVN  
PSIIAQKYNKLN--EKKTEFLENI AVYGD AFLLLP AFSFRSNTATSFKVYHTLKEFKAT-  
QRAIFFHPAYLKSLAQFWRTKGVKAYRLSSGFMITSAALELCENVKLYGFWPFSKSTEK-  
MPISHHYYDNQLPKP-----GFHAMPKEYNQILQLHGKGILKLQFGKCESD-----

#Aquchrcan\_GT29\_ST8Sia6

LSSSIKKKRYSEDYY--LHIVTKLQONCTWIRRPEESTKFRSELASCCDAVHNF-----  
-----IASQNNNSPLGSNMSYEVDSKKT-ILITEDI FKMLP-----V-SSPLS  
VY---PFKTCAVVGNGGILKNSSCGAEIDHSDVFRCNLPPTTGSISKDVGNKTNLVTVN  
PSIIAQKYNKLN--EKKTEFLENI AVYGD AFLLLP AFSFRSNTATSFKVYHTLQEFKAT-  
QRAIFFHPTYLKSLAQFWRTKGVKAYRLSSGFMITSAALELCENVKLYGFWPFSKSTEK-  
MPISHHYYDNQLPKP-----GFHAMPKEYNQILQLHGKGILKLQFGKCESD-----

#Halleuala\_GT29\_ST8Sia6

LSSSIKKKRYSEDYY--LHIVTKLQONCTWIRRPEESTKFRSELASCCDAVHNF-----  
-----IASQNNNSPLGSNMSYEVDSKKT-ILITEDI FKMLP-----V-SSPLS  
VY---PFKTCAVVGNGGILKNSSCGAEIDHSDVFRCNLPPTTGSISKDVGNKTNLVTVN  
PSIIAQKYNKLN--EKKTEFLENI AVYGD AFLLLP AFSFRSNTATSFKVYHTLQEFKAT-  
QRAIFFHPTYLKSLAQFWRTKGVKAYRLSSGFMITSAALELCENVKLYGFWPFSKSTEK-  
MPISHHYYDNQLPKP-----GFHAMPKEYNQILQLHGKGILKLQFGKCESD-----
